# Supplementary material for: Design and synthesis of novel N-benzyl-2,5-dihydro-1H-pyrrole-linked benzopyrimidine conjugates as antimicrobial agents: study combining in vitro and in silico analysis
Source: Royal Society of Chemistry journal article supplement (doi:10.1039/d4nj02744b), 2024-01-01
Supplement: d4nj02744b1.pdf [file d4nj02744b1.pdf]

## Supporting Information

for

### **Design and synthesis of novel *N*-benzyl-2,5-dihydro-1*H*-pyrrole linked benzopyrimidines conjugates as antimicrobial agents: study combining *in vitro* and *in silico***

Sarra Chortani,<sup>ab</sup> Sami Ben Salah,<sup>a</sup> Amel Hajlaoui,<sup>b</sup> Mabrouk Horchani,<sup>b</sup> Hayet Edziri,<sup>c</sup> Adam Daïch,<sup>a</sup> Hichem Ben Jannet,<sup>b</sup> Anis Romdhane,<sup>b</sup> Ata Martin Lawson,<sup>\*a</sup> and Mohamed Othman<sup>\*a</sup>

<sup>a</sup> Normandie Univ., UNILEHAVRE, URCOM, 76600 Le Havre, France. UR 3221, INC3M, FR-CNRS 3038 UFR ST, BP: 1123, 25 rue Philippe Lebon, F-76063 Le Havre Cedex, France

<sup>b</sup> Laboratory of Heterocyclic Chemistry, Natural Products and Reactivity (LR11ES39), Faculty of Science of Monastir, University of Monastir, Avenue of Environment, 5019 Monastir, Tunisia

<sup>c</sup> Laboratory of Transmissible Diseases and Biologically Active Substances, Faculty of Pharmacy, 5000 Monastir, Tunisia

E-mail: [mohamed.othman@univ-lehavre.fr](mailto:mohamed.othman@univ-lehavre.fr); †ORCID Mohamed Othman: [0000-0002-8379-5704](https://orcid.org/0000-0002-8379-5704)

## Table of contents

|      |                                                                                      |      |
|------|--------------------------------------------------------------------------------------|------|
| I.   | General remarks                                                                      | S.2  |
| II.  | General procedure for the synthesis of 2-aryl-benzopyrimidinone <b>2</b>             | S.2  |
| III. | General procedure for propargylation of 2-aryl-benzopyrimidinone <b>2</b>            | S.6  |
| IV.  | General procedure for the synthesis of the cyclo-adducts <b>5a-h</b> and <b>6a-h</b> | S.13 |
| V.   | Copies of <sup>1</sup> H and <sup>13</sup> C NMR spectra for all new compounds       | S.23 |

### I. General remarks

All reactions were monitored by TLC using aluminum sheets of Merck silica gel 60 F254, 0.2 mm. Melting temperatures were determined on an electrothermal 9002 apparatus and were reported uncorrected. All purifications were performed using an automated purification system Büchi C-815 puriflash, using 200-800 nm UV scan and ELSD as a detector. NMR spectra were recorded on a Bruker AC-300 spectrometer at 300 MHz (<sup>1</sup>H) and 75 MHz (<sup>13</sup>C). Chemical shifts are reported in parts per million ( $\delta$ ).

Chromatographic separations were achieved on silica gel columns (Kieselgel 60, 40–63  $\mu$ m, Merck) typically using a cyclohexane/ethyl acetate eluent system. In all cases, distilled solvents were used as eluents for column chromatography.

Solvents (CH<sub>3</sub>CN, DMF, THF) were distilled before use, taking care to exclude moisture. All reactions were carried out under an inert argon atmosphere. All glass apparatus was oven-dried and cooled under vacuum before use. The infrared spectra (IR) were recorded on a Perkin-Elmer FT-IR Paragon 1000 spectrometer.

Mass spectra (GC-MS) were obtained on a ThermoFinniganAutomass III spectrometer coupled with a gas chromatograph Trace GC 2000. High-resolution mass spectra (HRMS) were measured on an Agilent 6530 Q-ToF MS system.

### II. General procedure for the synthesis of 2-aryl-benzopyrimidinone **2**

To a mixture of 2-aminobenzamide **1** (5 mmol) and various arylaldehydes (5 mmol) in dry acetonitrile (50 mL), molecular iodine (5 mmol) was added. After the reaction was completed, the mixture was cooled to room temperature. A solution of sodium thiosulphate (5%) was added and the resulting solid was filtered off and washed with water. The crude product was recrystallized from ethanol.

**2a : 2-phenylbenzopyrimidin-4(3H)-one**

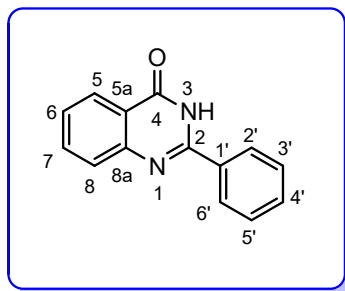

White solid; yield: 55%; mp: 250-252 °C; IR (ATR,  $\text{cm}^{-1}$ )  $\nu$ : 1660.82 (C=O);  $R_f$  (cyclohexane/EtOAc: 6/4) = 0.5.  $^1\text{H}$  NMR (300MHz, DMSO- $d_6$ ):  $\delta$  (ppm) = 7.56 (m, 4H,  $\text{H}_{\text{arom}}$ ), 7.74 (d, 1H,  $\text{H}_8$ ,  $J = 7.5$  Hz), 7.82 (td, 1H,  $\text{H}_7$ ,  $J = 8.1\text{Hz}$ ,  $J = 1.5$  Hz), 8.18 (m, 3H,  $\text{H}_{\text{arom}}$ ), 12.47 (s, 1H, NH).  $^{13}\text{C}$  NMR (75 MHz, DMSO- $d_6$ ):  $\delta$  (ppm) = 121.9 ( $\text{C}_{5a}$ ), 125.8, ( $\text{C}_{\text{arom}}$ ), 126.4 ( $\text{C}_{\text{arom}}$ ), 127.3 ( $\text{C}_{\text{arom}}$ ), 127.7 ( $2\text{C}_{\text{arom}}$ ), 128.5 ( $2\text{C}_{\text{arom}}$ ), 131.2 ( $\text{C}_{\text{arom}}$ ), 132.7 ( $\text{C}_{\text{arom}}$ ), 134.4 ( $\text{C}_{1'}$ ), 148.6 ( $\text{C}_{8a}$ ), 152.5 ( $\text{C}_2$ ), 162.2 ( $\text{C}_4$ ). ES-HRMS  $[\text{M}+\text{H}]^+$  calcd. ( $\text{C}_{14}\text{H}_{11}\text{N}_2\text{O}$ ) $^+$ : 223.0871, found: 223.0880.

**2b: 2-(p-tolyl)benzopyrimidin-4(3H)-one**

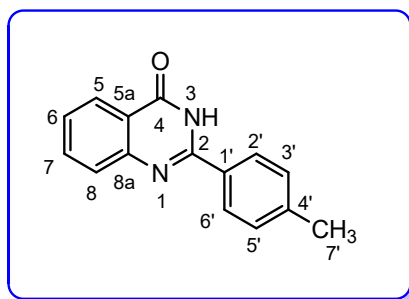

White solid; yield: 82%; mp: 253-255 °C; IR (ATR,  $\text{cm}^{-1}$ )  $\nu$ : 1656.30 (C=O);  $R_f$  (cyclohexane/EtOAc: 6/4) = 0.48.  $^1\text{H}$  NMR (300 MHz, DMSO- $d_6$ ):  $\delta$  (ppm) = 2.39 (s, 3H,  $\text{H}_{7'}$ ), 7.34 (d, 2H,  $\text{H}_{3',5'}$ ,  $J = 8.1$  Hz), 7.48 (t, 1H,  $\text{H}_6$ ,  $J = 7.9$  Hz), 7.71 (d, 1H,  $\text{H}_8$ ,  $J = 7.9$  Hz), 7.80 (t, 1H,  $\text{H}_7$ ,  $J = 7.6$  Hz), 8.09 (d, 2H,  $\text{H}_{2',6'}$ ,  $J = 8.2$  Hz), 8.14 (d, 1H,  $\text{H}_5$ ,  $J = 6.9$  Hz), 12.44 (s, 1H, NH).  $^{13}\text{C}$  NMR (75 MHz, DMSO- $d_6$ ):  $\delta$  (ppm) = 21.4 ( $\text{C}_{7'}$ ), 121.3 ( $\text{C}_{5a}$ ), 126.3 ( $\text{C}_{\text{arom}}$ ), 126.8 ( $\text{C}_{\text{arom}}$ ), 127.8 ( $\text{C}_{\text{arom}}$ ), 128.1 ( $2\text{C}_{\text{arom}}$ ), 129.6 ( $2\text{C}_{\text{arom}}$ ), 130.1 ( $\text{C}_{1'}$ ), 135.0 ( $\text{C}_{\text{arom}}$ ), 141.9 ( $\text{C}_{4'}$ ), 149.2 ( $\text{C}_{8a}$ ), 152.7 ( $\text{C}_2$ ), 162.8 ( $\text{C}_4$ ). ES-HRMS  $[\text{M}+\text{H}]^+$  calcd. ( $\text{C}_{15}\text{H}_{13}\text{N}_2\text{O}$ ) $^+$ : 237.0983, found: 237.1034.

**2c: 2-(4-methoxyphenyl)benzopyrimidinone**

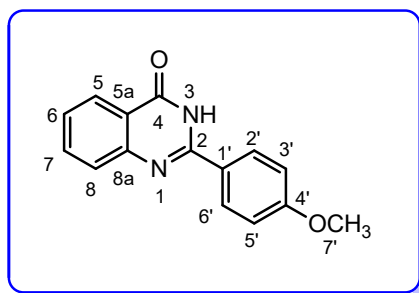

White solid; yield: 60%; mp: 240-242 °C; IR (ATR,  $\text{cm}^{-1}$ )  $\nu$ : 1660.01 (C=O);  $R_f$  (cyclohexane/EtOAc: 6/4) = 0.45).  $^1\text{H}$  NMR(300MHz,  $\text{DMSO-}d_6$ ):  $\delta$  (ppm) = 3.77 (s, 3H,  $\text{H}_{1'}$ ), 7.00 (d, 2H,  $\text{H}_{3',5'}$ ,  $J = 8.7$  Hz), 7.40 (t, 1H,  $\text{H}_6$ ,  $J = 7.8$  Hz), 7.60 (d, 1H,  $\text{H}_8$ ,  $J = 8.1$  Hz), 7.72 (td, 1H,  $\text{H}_7$ ,  $J = 8.1$  Hz,  $J = 1.2$  Hz), 8.06 (dd, 1H,  $\text{H}_5$ ,  $J = 8.1$  Hz,  $J = 0.9$  Hz), 8.12 (d, 2H,  $\text{H}_{2',6'}$ ,  $J = 8.7$  Hz), 12.26 (s, 1H, NH).  $^{13}\text{C}$  NMR (75 MHz,  $\text{DMSO-}d_6$ ):  $\delta$  (ppm) = 55.4 ( $\text{C}_7$ ), 113.9 ( $2\text{C}_{\text{arom}}$ ), 120.6( $\text{C}_{\text{arom}}$ ), 124.8( $\text{C}_{1'}$ ), 125.7( $\text{C}_{\text{arom}}$ ), 126.0 ( $\text{C}_{\text{arom}}$ ), 127.1 ( $\text{C}_{\text{arom}}$ ), 129.4 ( $2\text{C}_{\text{arom}}$ ), 134.4 ( $\text{C}_{\text{arom}}$ ), 148.8 ( $\text{C}_{8a}$ ), 151.9 ( $\text{C}_2$ ), 161.9 ( $\text{C}_4$ ), 162.3 ( $\text{C}_4$ ). ES-HRMS  $[\text{M}+\text{H}]^+$  calcd. ( $\text{C}_{15}\text{H}_{13}\text{N}_2\text{O}_2$ ) $^+$ : 253.0977, found: 253.0981.

**2d: 2-(3,4-dimethoxyphenyl)benzopyrimidin-4(3H)-one**

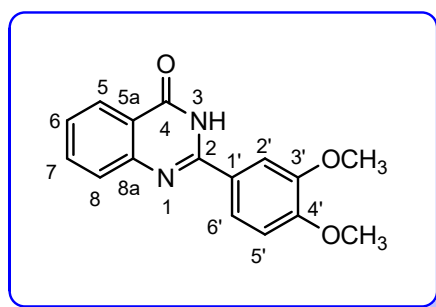

White solid; yield: 70%; mp: 244-246 °C; IR (ATR,  $\text{cm}^{-1}$ )  $\nu$ : 1572.33 (C=O);  $R_f$  (cyclohexane/EtOAc: 6/4) = 0.51.  $^1\text{H}$  NMR(300 MHz,  $\text{DMSO-}d_6$ ):  $\delta$  (ppm) = 3.85 (s, 3H,  $\text{OCH}_3$ ), 3.89 (s, 3H,  $\text{OCH}_3$ ), 7.10 (d, 1H,  $\text{H}_{5'}$ ,  $J = 8.6$  Hz), 7.46 (t, 1H,  $\text{H}_6$ ,  $J = 7.9$  Hz), 7.70 (d, 1H,  $\text{H}_{\text{arom}}$ ,  $J = 7.8$  Hz), 7.79-7.89 (m, 3H,  $\text{H}_{\text{arom}}$ ), 8.12 (d, 1H,  $\text{H}_5$ ,  $J = 7.8$  Hz), 12.44 (s, 1H, NH).  $^{13}\text{C}$  NMR (75 MHz,  $\text{DMSO-}d_6$ ):  $\delta$  (ppm) = 56.1 ( $2\text{OCH}_3$ ), 111.1 ( $\text{C}_{\text{arom}}$ ), 111.8 ( $\text{C}_{\text{arom}}$ ), 121.1 ( $\text{C}_{5a}$ ), 121.6 ( $\text{C}_{\text{arom}}$ ), 125.2 ( $\text{C}_{1'}$ ), 126.3 ( $\text{C}_{\text{arom}}$ ), 126.6 ( $\text{C}_{\text{arom}}$ ), 127.8 ( $\text{C}_{\text{arom}}$ ), 135.0 ( $\text{C}_{\text{arom}}$ ), 149.0 ( $\text{C}_{8a}$ ), 149.4 ( $\text{C}_{3'}$ ), 152.0 ( $\text{C}_{4'}$ ), 152.3 ( $\text{C}_2$ ), 162.8( $\text{C}_4$ ). ES-HRMS  $[\text{M}+\text{H}]^+$  calcd. ( $\text{C}_{16}\text{H}_{15}\text{N}_2\text{O}_3$ ) $^+$ : 283.1038, found: 283.1092.

**2e: 2-(4-(tert-butyl)phenyl)benzopyrimidin-4(3H)-one**

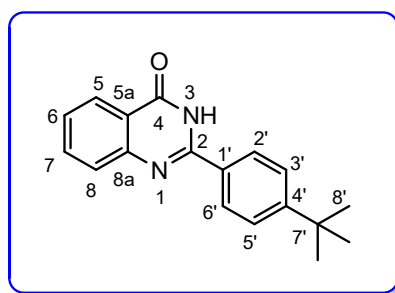

White solid; yield: 78%; mp: 222-224°C; IR (ATR,  $\text{cm}^{-1}$ )  $\nu$ : 1572.33 (C=O);  $R_f$  (cyclohexane/EtOAc: 6/4) = 0.50.  $^1\text{H}$  NMR (300 MHz,  $\text{DMSO-}d_6$ ):  $\delta$  (ppm) = 1.32 (s, 9H,  $\text{H}_{15}$ ), 7.48-7.57 (m, 3H,  $\text{H}_{\text{arom}}$ ), 7.72 (d, 1H,  $\text{H}_8$ ,  $J = 7.7$  Hz), 7.81 (t, 1H,  $\text{H}_7$ ,  $J = 7.6$  Hz), 8.13-8.17 (m, 3H,  $\text{H}_{\text{arom}}$ ), 12.48 (s, 1H, NH).  $^{13}\text{C}$  NMR (75 MHz,  $\text{DMSO-}d_6$ ):  $\delta$  (ppm) = 31.3 ( $\text{C}_{8'}$ ), 35.1 ( $\text{C}_7$ ), 121.4 ( $\text{C}_{5a}$ ), 125.9 ( $2\text{C}_{\text{arom}}$ ), 126.3 ( $\text{C}_{\text{arom}}$ ), 126.8 ( $\text{C}_{\text{arom}}$ ), 127.8 ( $\text{C}_{\text{arom}}$ ), 128.0 ( $2\text{C}_{\text{arom}}$ ), 130.4 ( $\text{C}_{1'}$ ), 135.0 ( $\text{C}_{\text{arom}}$ ), 149.4 ( $\text{C}_{8a}$ ), 152.7 ( $\text{C}_2$ ), 154.8 ( $\text{C}_{4'}$ ), 162.8 ( $\text{C}_4$ ). ES-HRMS  $[\text{M}+\text{H}]^+$  calcd. ( $\text{C}_{18}\text{H}_{19}\text{N}_2\text{O}$ ) $^+$ : 279.1453, found: 279.1503.

**2f: 2-(4-chlorophenyl)benzopyrimidinone**

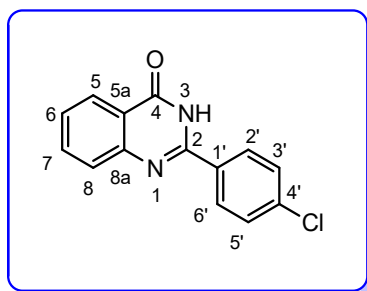

White solid; yield: 68%; mp>300 °C; IR (ATR, cm<sup>-1</sup>) v: 1665.72 (C=O); R<sub>f</sub> (cyclohexane/EtOAc: 6/4) = 0.60. <sup>1</sup>H NMR (300 MHz, DMSO-*d*<sub>6</sub>): δ (ppm) = 7.75 (m, 5H, H<sub>arom</sub>), 8.19 (d, 3H, H<sub>arom</sub>, *J* = 6.6 Hz), 12.53 (s, 1H, NH). <sup>13</sup>C NMR (75 MHz, DMSO-*d*<sub>6</sub>): δ (ppm) = 121.0 (C<sub>5a</sub>), 125.8 (C<sub>arom</sub>), 126.6 (C<sub>arom</sub>), 127.3 (C<sub>arom</sub>), 128.6 (2C<sub>arom</sub>), 129.5 (2C<sub>arom</sub>), 131.6 (C<sub>1'</sub>), 134.5 (C<sub>arom</sub>), 136.2 (C<sub>4'</sub>), 148.5 (C<sub>8a</sub>), 151.5 (C<sub>2</sub>), 162.2 (C<sub>4</sub>). ES-HRMS [M+H]<sup>+</sup> calcd. (C<sub>14</sub>H<sub>10</sub>ClN<sub>2</sub>O)<sup>+</sup>: 257.0482, found: 257.0491.

**2g: 2-(4-fluorophenyl)benzopyrimidin-4(3H)-one**

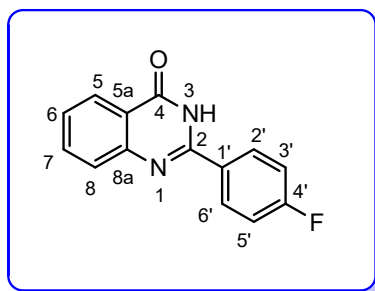

White solid; yield: 80%, mp>300 °C; IR (ATR, cm<sup>-1</sup>) v: 1661.33 (C=O). R<sub>f</sub> (cyclohexane/EtOAc: 6/4) = 0.60. <sup>1</sup>H NMR(300 MHz, DMSO-*d*<sub>6</sub>): δ (ppm) = 7.37-7.43 (m, 2H, H<sub>arom</sub>), 7.50 (t, 1H, H<sub>6</sub>, *J* = 8.1 Hz), 7.73 (d, 1H, H<sub>8</sub>, *J* = 7.6 Hz), 7.82-7.88 (m, 1H, H<sub>7</sub>), 8.14 (dd, 1H, H<sub>5</sub>, *J*<sub>1</sub> = 7.6 Hz, *J*<sub>2</sub> = 1.3 Hz), 8.24-8.28 (m, 2H, H<sub>arom</sub>, *J* = 7.6 Hz), 12.59 (s, 1H, NH). <sup>13</sup>C NMR (75 MHz, DMSO-*d*<sub>6</sub>): δ (ppm) = 116.0 (d, *J* = 22.0 Hz, C<sub>3'</sub> + C<sub>5'</sub>), 121.3 (C<sub>5a</sub>), 126.3 (C<sub>arom</sub>), 127.0 (C<sub>arom</sub>), 127.9 (C<sub>arom</sub>), 129.7 (d, *J* = 3.0 Hz, C<sub>1'</sub>), 130.8 (d, *J* = 9.0 Hz, C<sub>2'</sub> + C<sub>6'</sub>), 135.1 (C<sub>arom</sub>), 149.0 (C<sub>8a</sub>), 151.9 (C<sub>2</sub>), 162.7 (C<sub>4</sub>), 164.5 (d, *J* = 249.6 Hz, C<sub>4'</sub>). ES-HRMS [M+H]<sup>+</sup> calcd. (C<sub>14</sub>H<sub>10</sub>FN<sub>2</sub>O)<sup>+</sup>: 241.0724, found: 241.0784.

**2h: 2-(3-bromophenyl)benzopyrimidin-4(3H)-one**

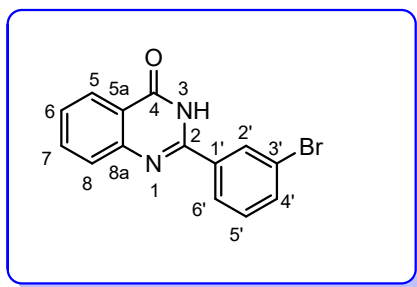

White solid; yield: 72%; mp>300 °C; IR (ATR, cm<sup>-1</sup>)  $\nu$ : 1670.98 (C=O); R<sub>f</sub> (cyclohexane/EtOAc: 6/4) = 0.60. <sup>1</sup>H NMR (300 MHz, DMSO-*d*<sub>6</sub>):  $\delta$  (ppm) = 7.50-7.58 (m, 2H, H<sub>arom</sub>), 7.56-7.89 (m, 3H, H<sub>arom</sub>), 8.15-8.22 (m, 2H, H<sub>arom</sub>), 8.39 (t, 1H, H<sub>10</sub>, *J* = 1.7 Hz), 12.64 (s, 1H, NH). <sup>13</sup>C NMR (75 MHz, DMSO-*d*<sub>6</sub>):  $\delta$  (ppm) = 113.3 (C<sub>arom</sub>), 115.2 (C<sub>arom</sub>), 120.8 (C<sub>5a</sub>), 123.2 (C<sub>3'</sub>), 126.3 (C<sub>arom</sub>), 127.3 (C<sub>arom</sub>), 127.5 (C<sub>arom</sub>), 129.6 (C<sub>arom</sub>), 130.8 (C<sub>1'</sub>), 131.2 (C<sub>arom</sub>), 133.4 (C<sub>arom</sub>), 148.7 (C<sub>8a</sub>), 152.3 (C<sub>2</sub>), 161.0 (C<sub>4</sub>). ES-HRMS [M+H]<sup>+</sup> calcd. (C<sub>14</sub>H<sub>10</sub>BrN<sub>2</sub>O)<sup>+</sup>: 300.9934, found: 300.9994.

### III. General procedure for *N*-propargylation of 2-aryl-benzopyrimidinone 2

2-aryl-benzopyrimidinone 2 (1 mmol) was dissolved in dry DMF (15 mL) and (2 eq.) of sodium borohydride was added. The reaction mixture was stirred at room temperature for 1 h. Then, propargyl bromide (1.5 eq.) was added dropwise. The reaction was performed for 24 h at room temperature. The mixture was diluted with water. The precipitate formed was filtered, washed with water, dried and purified by silica gel flash column chromatography to afford to dialkylated products 3 and 4.

#### *3a: 2-phenyl-3-(prop-2-yn-1-yl)benzopyrimidin-4(3H)-one*

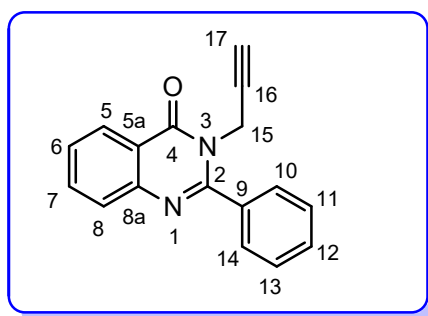

White solid; yield: 58%; mp: 178-180 °C; IR (ATR, cm<sup>-1</sup>)  $\nu$ : 2121.50 (C≡C), 3247.71 (≡C-H), 1571.23 (C=O); R<sub>f</sub> (cyclohexane/EtOAc: 9/1) = 0.5. <sup>1</sup>H NMR (300 MHz, CDCl<sub>3</sub>):  $\delta$  (ppm) = 2.36 (s, 1H, H<sub>17</sub>), 4.70 (d, 2H, H<sub>15</sub>, *J* = 1.4 Hz), 7.50-7.65 (m, 4H, H<sub>arom</sub>), 7.70-7.84 (m, 4H, H<sub>arom</sub>), 8.27 (d, 1H, H<sub>5</sub>, *J* = 7.9 Hz). <sup>13</sup>C NMR (75 MHz, CDCl<sub>3</sub>):  $\delta$  (ppm) = 36.3 (C<sub>15</sub>), 72.6 (C<sub>17</sub>), 78.3 (C<sub>16</sub>), 120.6 (C<sub>5a</sub>), 126.9 (C<sub>arom</sub>), 127.3 (C<sub>arom</sub>), 127.6 (C<sub>arom</sub>), 128.1 (2C<sub>arom</sub>), 128.9 (2C<sub>arom</sub>), 130.4 (C<sub>arom</sub>), 134.7 (C<sub>arom</sub>), 134.8 (C<sub>9</sub>), 147.1 (C<sub>8a</sub>), 155.4 (C<sub>2</sub>), 161.6 (C<sub>4</sub>). ES-HRMS [M+H]<sup>+</sup> calcd. (C<sub>17</sub>H<sub>13</sub>N<sub>2</sub>O)<sup>+</sup>: 261.0983, found: 261.1040.

#### *3b: 3-(prop-2-yn-1-yl)-2-(p-tolyl)benzopyrimidin-4(3H)-one*

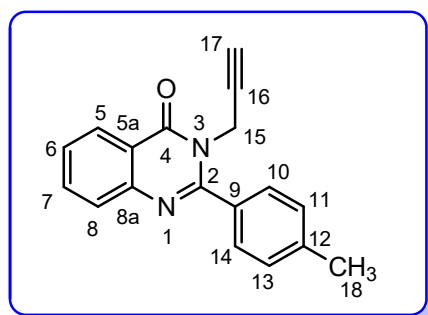

White solid; yield: 36%; mp: 166-168 °C; IR (ATR,  $\text{cm}^{-1}$ )  $\nu$ : 2121.70 ( $\text{C}\equiv\text{C}$ ), 3247.09 ( $\equiv\text{C}-\text{H}$ ), 1577.02 ( $\text{C}=\text{O}$ );  $R_f$  (cyclohexane/ EtOAc: 9/1) = 0.5.  $^1\text{H}$  NMR (300 MHz,  $\text{CDCl}_3$ ):  $\delta$ (ppm) = 2.35-2.37 (m, 1H,  $\text{H}_{17}$ ), 2.46 (s, 3H,  $\text{H}_{18}$ ), 4.69 (d, 2H,  $\text{H}_{15}$ ,  $J = 2.3$  Hz), 7.34 (d, 2H,  $\text{H}_{\text{arom}}$ ,  $J = 7.8$  Hz), 7.49-7.55 (m, 1H,  $\text{H}_{\text{arom}}$ ), 7.63-7.67 (m, 2H,  $\text{H}_{\text{arom}}$ ), 7.74-7.81 (m, 2H,  $\text{H}_{\text{arom}}$ ), 8.35 (d, 1H,  $\text{H}_5$ ,  $J = 8.3$  Hz).  $^{13}\text{C}$  NMR(75 MHz,  $\text{CDCl}_3$ ):  $\delta$  (ppm) = 21.5 ( $\text{C}_{18}$ ), 36.4 ( $\text{C}_{15}$ ), 72.6 ( $\text{C}_{17}$ ), 78.5 ( $\text{C}_{16}$ ), 120.5 ( $\text{C}_{5a}$ ), 126.9 ( $\text{C}_{\text{arom}}$ ), 127.1 ( $\text{C}_{\text{arom}}$ ), 127.6 ( $\text{C}_{\text{arom}}$ ), 128.0 ( $2\text{C}_{\text{arom}}$ ), 129.5 ( $2\text{C}_{\text{arom}}$ ), 131.9 ( $\text{C}_9$ ), 134.6 ( $\text{C}_{\text{arom}}$ ), 140.6 ( $\text{C}_{12}$ ), 147.2 ( $\text{C}_{8a}$ ), 155.6 ( $\text{C}_2$ ), 161.7 ( $\text{C}_4$ ). ES-HRMS  $[\text{M}+\text{H}]^+$  calcd. ( $\text{C}_{18}\text{H}_{15}\text{N}_2\text{O}$ ) $^+$ : 275.1140, found: 275.1194.

**3c: 2-(4-methoxyphenyl)-3-(prop-2-yn-1-yl)benzopyrimidin-4(3H)-one**

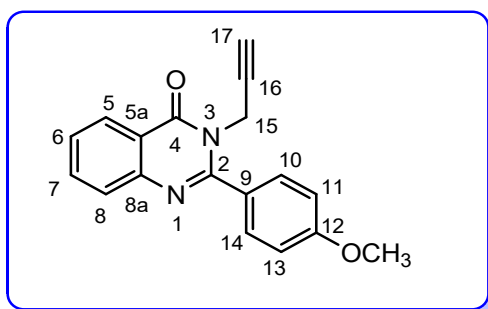

White solid; yield: 55%; mp: 234-236 °C; IR (ATR,  $\text{cm}^{-1}$ )  $\nu$ : 2119.95 ( $\text{C}\equiv\text{C}$ ), 3245.43 ( $\equiv\text{C}-\text{H}$ ), 1605.21 ( $\text{C}=\text{O}$ );  $R_f$  (cyclohexane/ EtOAc: 9/1) = 0.5.  $^1\text{H}$  NMR (300 MHz,  $\text{CDCl}_3$ ):  $\delta$  (ppm) = 2.38 (s, 1H,  $\text{H}_{17}$ ), 3.91 (s, 3H,  $\text{OCH}_3$ ), 4.72 (d, 2H,  $\text{H}_{15}$ ,  $J = 1.8$  Hz), 7.06 (d, 2H,  $\text{H}_{\text{arom}}$ ,  $J = 8.6$  Hz), 7.52 (t, 1H,  $\text{H}_6$ ,  $J = 6.8$  Hz), 7.73-7.82 (m, 4H,  $\text{H}_{\text{arom}}$ ), 8.36 (d, 1H,  $\text{H}_5$ ,  $J = 8.3$  Hz).  $^{13}\text{C}$  NMR (75 MHz,  $\text{CDCl}_3$ ):  $\delta$  (ppm) = 36.5 ( $\text{C}_{15}$ ), 55.5 ( $\text{OCH}_3$ ), 72.6 ( $\text{C}_{17}$ ), 78.6 ( $\text{C}_{16}$ ), 114.2 ( $2\text{C}_{\text{arom}}$ ), 120.5 ( $\text{C}_{5a}$ ), 126.9 ( $\text{C}_{\text{arom}}$ ), 127.0 ( $\text{C}_9$ ), 127.1 ( $\text{C}_{\text{arom}}$ ), 127.5 ( $\text{C}_{\text{arom}}$ ), 129.8 ( $2\text{C}_{\text{arom}}$ ), 134.6 ( $\text{C}_{\text{arom}}$ ), 147.2 ( $\text{C}_{8a}$ ), 155.4 ( $\text{C}_2$ ), 161.2 ( $\text{C}_{12}$ ), 161.9 ( $\text{C}_4$ ). ES-HRMS  $[\text{M}+\text{H}]^+$  calcd. ( $\text{C}_{18}\text{H}_{15}\text{N}_2\text{O}_2$ ) $^+$ : 291.1089, found: 291.1144.

**3d: 2-(3,4-dimethoxyphenyl)-3-(prop-2-yn-1-yl)benzopyrimidin-4(3H)-one**

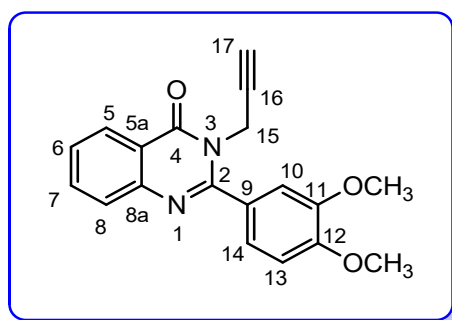

White solid; yield: 32%; mp: 157-159 °C; IR (ATR,  $\text{cm}^{-1}$ )  $\nu$ : 2121.49 ( $\text{C}\equiv\text{C}$ ), 3221.04 ( $\equiv\text{C}-\text{H}$ ), 1577.16 ( $\text{C}=\text{O}$ );  $R_f$  (cyclohexane/ EtOAc: 9/1) = 0.5.  $^1\text{H}$  NMR (300 MHz,  $\text{CDCl}_3$ ):  $\delta$  (ppm) = 2.40 (t, 1H,  $\text{H}_{17}$ ,  $J = 2.2$  Hz), 3.98 (s, 6H,  $2\text{OCH}_3$ ), 4.72 (d, 2H,  $\text{H}_{15}$ ,  $J = 2.2$  Hz), 7.03 (d, 1H,  $\text{H}_{\text{arom}}$ ,  $J = 8.2$  Hz), 7.35-7.39 (m, 2H,  $\text{H}_{\text{arom}}$ ), 7.50-7.55 (m, 1H,  $\text{H}_{\text{arom}}$ ), 7.75-7.82 (m, 2H,  $\text{H}_{\text{arom}}$ ), 8.36 (d, 1H,  $\text{H}_5$ ,  $J = 8.1$  Hz).  $^{13}\text{C}$  NMR(75 MHz,  $\text{CDCl}_3$ ):  $\delta$  (ppm) = 36.7 ( $\text{C}_{15}$ ), 56.0 ( $\text{OCH}_3$ ), 56.1 ( $\text{OCH}_3$ ), 72.6 ( $\text{C}_{17}$ ), 79.0 ( $\text{C}_{16}$ ), 111.1 ( $\text{C}_{\text{arom}}$ ), 111.2 ( $\text{C}_{\text{arom}}$ ), 120.5 ( $\text{C}_{5a}$ ), 121.3 ( $\text{C}_{\text{arom}}$ ), 126.9 ( $\text{C}_{\text{arom}}$ ), 127.1 ( $\text{C}_9$ ), 127.2 ( $\text{C}_{\text{arom}}$ ), 127.5 ( $\text{C}_{\text{arom}}$ ), 134.7 ( $\text{C}_{\text{arom}}$ ), 147.1 ( $\text{C}_{8a}$ ), 148.9 ( $\text{C}_{11}$ ),

150.7 (C<sub>12</sub>), 155.3 (C<sub>2</sub>), 161.8 (C<sub>4</sub>). ES-HRMS [M+H]<sup>+</sup> calcd. (C<sub>19</sub>H<sub>17</sub>N<sub>2</sub>O<sub>3</sub>)<sup>+</sup>: 321.1194, found: 321.1260.

**3e: 2-(4-(tert-butyl)phenyl)-3-(prop-2-yn-1-yl)benzopyrimidin-4(3H)-one**

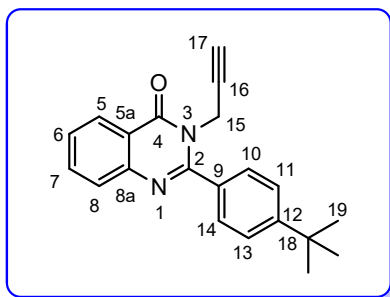

White solid; yield: 60%; mp: 220-222 °C; IR (ATR, cm<sup>-1</sup>)  $\nu$ : 2120.73 (C $\equiv$ C), 3246.61 ( $\equiv$ C-H), 1630.35 (C=O). R<sub>f</sub> (cyclohexane/ EtOAc: 9/1) = 0.5. <sup>1</sup>H NMR (300 MHz, CDCl<sub>3</sub>):  $\delta$  (ppm) = 1.39 (s, 9H, H<sub>19</sub>), 2.39 (t, 1H, H<sub>17</sub>, *J* = 2.4 Hz), 4.72 (d, 2H, H<sub>15</sub>, *J* = 2.4 Hz), 7.50-7.58 (m, 3H, H<sub>arom</sub>), 7.69-7.81 (m, 4H, H<sub>arom</sub>), 8.36 (d, 1H, H<sub>5</sub>, *J* = 8.2 Hz). <sup>13</sup>C NMR (75 MHz, CDCl<sub>3</sub>):  $\delta$  (ppm) = 31.2 (C<sub>19</sub>), 34.9 (C<sub>18</sub>), 36.5 (C<sub>15</sub>), 72.6 (C<sub>17</sub>), 78.6 (C<sub>16</sub>), 120.6 (C<sub>5a</sub>), 125.8 (2C<sub>arom</sub>), 126.9 (C<sub>arom</sub>), 127.1 (C<sub>arom</sub>), 127.6 (C<sub>arom</sub>), 127.9 (2C<sub>arom</sub>), 131.8 (C<sub>9</sub>), 134.6 (C<sub>arom</sub>), 147.2 (C<sub>8a</sub>), 153.7 (C<sub>12</sub>), 155.6 (C<sub>2</sub>), 161.7 (C<sub>4</sub>). ES-HRMS [M+H]<sup>+</sup> calcd. (C<sub>21</sub>H<sub>21</sub>N<sub>2</sub>O)<sup>+</sup>: 317.1609, found: 317.1666.

**3f: 2-(4-chlorophenyl)-3-(prop-2-yn-1-yl)benzopyrimidin-4(3H)-one**

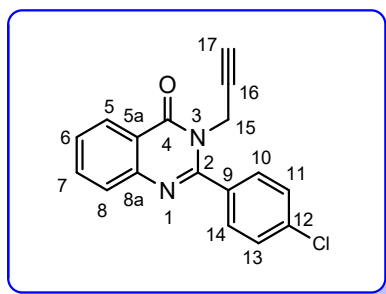

White solid; yield: 15%; mp: 159-161 °C; IR (ATR, cm<sup>-1</sup>)  $\nu$ : 2121.96 (C $\equiv$ C), 3248.47 ( $\equiv$ C-H), 1620.10 (C=O); R<sub>f</sub> (cyclohexane/ EtOAc: 9/1) = 0.5. <sup>1</sup>H NMR (300 MHz, CDCl<sub>3</sub>):  $\delta$  (ppm) = 2.38 (t, 1H, H<sub>17</sub>, *J* = 2.3 Hz), 4.68 (d, 2H, H<sub>15</sub>, *J* = 2.3 Hz), 7.55 (d, 3H, H<sub>arom</sub>, *J* = 8.4 Hz), 7.72-7.84 (m, 4H, H<sub>arom</sub>), 8.37 (d, 1H, H<sub>5</sub>, *J* = 7.9 Hz). <sup>13</sup>C NMR (75 MHz, CDCl<sub>3</sub>):  $\delta$  (ppm) = 36.3 (C<sub>15</sub>), 73.0 (C<sub>17</sub>), 78.2 (C<sub>16</sub>), 120.6 (C<sub>5a</sub>), 127.0 (C<sub>arom</sub>), 127.5 (C<sub>arom</sub>), 127.6 (C<sub>arom</sub>), 129.2 (2C<sub>arom</sub>), 129.6 (2C<sub>arom</sub>), 133.1 (C<sub>9</sub>), 134.8 (C<sub>arom</sub>), 136.7 (C<sub>12</sub>), 147.0 (C<sub>8a</sub>), 154.3 (C<sub>2</sub>), 161.5 (C<sub>4</sub>). ES-HRMS [M+H]<sup>+</sup> calcd. (C<sub>17</sub>H<sub>12</sub>ClN<sub>2</sub>O)<sup>+</sup>: 294.0530, found: 294.0651.



**3g: 2-(4-fluorophenyl)-3-(prop-2-yn-1-yl)benzopyrimidin-4(3H)-one**

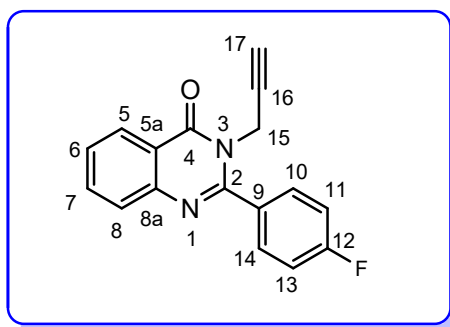

White solid; yield: 21%; mp: 190-192 °C; IR (ATR,  $\text{cm}^{-1}$ )  $\nu$ : 2124.82 ( $\text{C}\equiv\text{C}$ ), 3246.49 ( $\equiv\text{C}-\text{H}$ ), 1578.13 ( $\text{C}=\text{O}$ );  $R_f$  (cyclohexane/ EtOAc: 9/1) = 0.5.  $^1\text{H}$  NMR (300 MHz,  $\text{CDCl}_3$ ):  $\delta$  (ppm) = 2.38 (t, 1H,  $\text{H}_{17}$ ,  $J = 2.4$  Hz), 4.69 (d, 2H,  $\text{H}_{15}$ ,  $J = 2.4$  Hz), 7.23-7.29 (m, 2H,  $\text{H}_{\text{arom}}$ ), 7.55-7.57 (m, 1H,  $\text{H}_{\text{arom}}$ ), 7.74-7.84 (m, 4H,  $\text{H}_{\text{arom}}$ ), 8.36 (d, 1H,  $\text{H}_5$ ,  $J = 8.1$  Hz).  $^{13}\text{C}$  NMR (75 MHz,  $\text{CDCl}_3$ ):  $\delta$  (ppm) = 36.3 ( $\text{C}_{15}$ ), 72.8 ( $\text{C}_{17}$ ), 78.3 ( $\text{C}_{16}$ ), 116.0 (d,  $J = 22.0$  Hz,  $\text{C}_{11} + \text{C}_{13}$ ), 120.6 ( $\text{C}_{5a}$ ), 126.9 ( $\text{C}_{\text{arom}}$ ), 127.4 ( $\text{C}_{\text{arom}}$ ), 127.6 ( $\text{C}_{\text{arom}}$ ), 130.4 (d,  $J = 8.6$  Hz,  $\text{C}_{10} + \text{C}_{14}$ ), 130.8 (d,  $J = 3.0$  Hz,  $\text{C}_9$ ), 134.8 ( $\text{C}_{\text{arom}}$ ), 147.0 ( $\text{C}_{8a}$ ), 154.5 ( $\text{C}_2$ ), 161.6 ( $\text{C}_4$ ), 163.8 (d,  $J = 251.3$  Hz,  $\text{C}_{12}$ ). ES-HRMS  $[\text{M}+\text{H}]^+$  calcd. ( $\text{C}_{17}\text{H}_{12}\text{FN}_2\text{O}$ ) $^+$ : 279.0889, found: 279.0943.

**3h: 2-(3-bromophenyl)-3-(prop-2-yn-1-yl)benzopyrimidin-4(3H)-one**

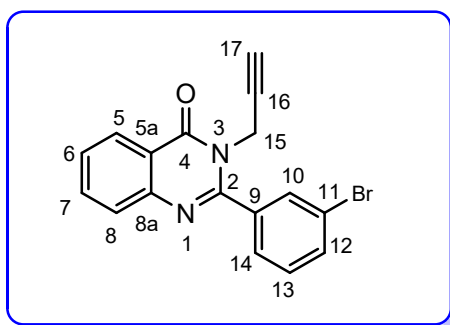

White solid; yield: 20%; mp: 174-176 °C; IR (ATR,  $\text{cm}^{-1}$ )  $\nu$ : 2134.15 ( $\text{C}\equiv\text{C}$ ), 3245.66 ( $\equiv\text{C}-\text{H}$ ), 1610.55 ( $\text{C}=\text{O}$ );  $R_f$  (cyclohexane/ EtOAc: 9/1) = 0.5.  $^1\text{H}$  NMR (300 MHz,  $\text{CDCl}_3$ ):  $\delta$  (ppm) = 2.40 (t, 1H,  $\text{H}_{17}$ ,  $J = 2.4$  Hz), 4.68 (d, 2H,  $\text{H}_{15}$ ,  $J = 2.4$  Hz), 7.44 (t, 1H,  $\text{H}_6$ ,  $J = 7.9$  Hz), 7.54 (t, 1H,  $\text{H}_7$ ,  $J = 6.7$  Hz), 7.70-7.84 (m, 4H,  $\text{H}_{\text{arom}}$ ), 7.93 (t, 1H,  $\text{H}_{\text{arom}}$ ,  $J = 1.6$  Hz), 8.37 (d, 1H,  $\text{H}_5$ ,  $J = 8.8$  Hz).  $^{13}\text{C}$  NMR (75 MHz,  $\text{CDCl}_3$ ):  $\delta$  (ppm) = 36.2 ( $\text{C}_{15}$ ), 73.0 ( $\text{C}_{17}$ ), 78.1 ( $\text{C}_{16}$ ), 120.6 ( $\text{C}_{5a}$ ), 122.9 ( $\text{C}_{11}$ ), 126.6 ( $\text{C}_{\text{arom}}$ ), 127.0 ( $\text{C}_{\text{arom}}$ ), 127.6 ( $\text{C}_{\text{arom}}$ ), 127.7 ( $\text{C}_{\text{arom}}$ ), 130.3 ( $\text{C}_{\text{arom}}$ ), 131.3 ( $\text{C}_{\text{arom}}$ ), 133.5 ( $\text{C}_{\text{arom}}$ ), 134.8 ( $\text{C}_{\text{arom}}$ ), 136.4 ( $\text{C}_9$ ), 146.9 ( $\text{C}_{8a}$ ), 153.8 ( $\text{C}_2$ ), 161.4 ( $\text{C}_4$ ). ES-HRMS  $[\text{M}+\text{H}]^+$  calcd. ( $\text{C}_{17}\text{H}_{12}\text{BrN}_2\text{O}$ ) $^+$ : 339.0098, found: 338.0148.

**4a: 2-phenyl-4-(prop-2-yn-1-yloxy)benzopyrimidine**

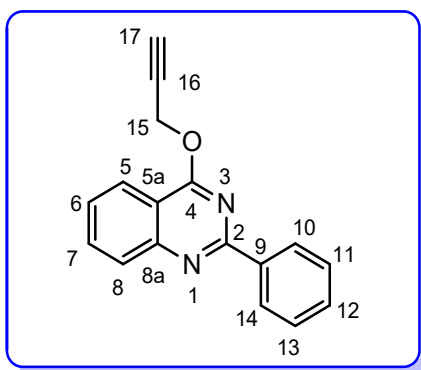

White solid; yield: 58%; mp: 140-142 °C; IR (ATR,  $\text{cm}^{-1}$ )  $\nu$ : 2126.35 ( $\equiv\text{C-H}$ ), 3206.16 ( $\equiv\text{C-H}$ );  $R_f$  (cyclohexane/ EtOAc: 9/1) = 0.5.  $^1\text{H}$  NMR (300 MHz,  $\text{CDCl}_3$ ):  $\delta$  (ppm) = 2.59 (t, 1H,  $\text{H}_{17}$ ,  $J = 2.4$  Hz), 5.37 (d, 2H,  $\text{H}_{15}$ ,  $J = 2.4$  Hz), 7.53-7.59 (m, 4H,  $\text{H}_{\text{arom}}$ ), 7.86 (t, 1H,  $\text{H}_7$ ,  $J = 8.3$  Hz), 8.03 (d, 1H,  $\text{H}_5$ ,  $J = 8.4$  Hz), 8.23 (d, 1H,  $\text{H}_8$ ,  $J = 8.1$  Hz), 8.60-8.64 (m, 2H,  $\text{H}_{\text{arom}}$ ).  $^{13}\text{C}$  NMR (75 MHz,  $\text{CDCl}_3$ ):  $\delta$  (ppm) = 54.2 ( $\text{C}_{15}$ ), 75.1 ( $\text{C}_{17}$ ), 78.2 ( $\text{C}_{16}$ ), 114.9 ( $\text{C}_{5a}$ ), 123.5 ( $\text{C}_{\text{arom}}$ ), 126.6 ( $\text{C}_{\text{arom}}$ ), 128.0 ( $\text{C}_{\text{arom}}$ ), 128.4 ( $2\text{C}_{\text{arom}}$ ), 128.5 ( $2\text{C}_{\text{arom}}$ ), 130.6 ( $\text{C}_{\text{arom}}$ ), 133.8 ( $\text{C}_{\text{arom}}$ ), 137.8 ( $\text{C}_9$ ), 152.1 ( $\text{C}_{8a}$ ), 159.7 ( $\text{C}_2$ ), 165.5 ( $\text{C}_4$ ). ES-HRMS  $[\text{M}+\text{H}]^+$  calcd. ( $\text{C}_{17}\text{H}_{13}\text{N}_2\text{O}$ ) $^+$ : 261.0983, found: 261.1036.

**4b: 4-(prop-2-yn-1-yloxy)-2-(p-tolyl)benzopyrimidine**

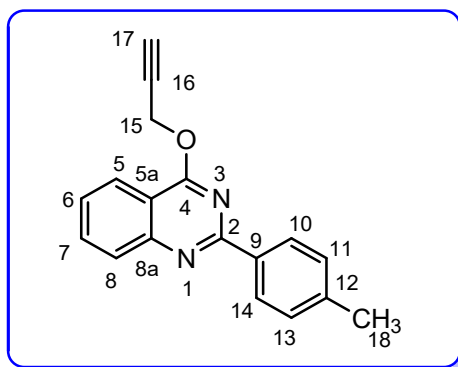

White solid; yield: 44%; mp: 160-162 °C; IR (ATR,  $\text{cm}^{-1}$ )  $\nu$ : 2126.65 ( $\text{C}\equiv\text{C-H}$ ), 3199.32 ( $\equiv\text{C-H}$ );  $R_f$  (cyclohexane/ EtOAc: 9/1) = 0.5.  $^1\text{H}$  NMR (300 MHz,  $\text{CDCl}_3$ ):  $\delta$  (ppm) = 2.47 (s, 3H,  $\text{H}_{18}$ ,  $J = 2.4$  Hz), 2.59 (t, 1H,  $\text{H}_{17}$ ,  $J = 2.4$  Hz), 5.35 (d, 2H,  $\text{H}_{15}$ ,  $J = 2.4$  Hz), 7.34 (d, 2H,  $\text{H}_{11,13}$ ,  $J = 8.0$  Hz), 7.53 (t, 1H,  $\text{H}_6$ ,  $J = 8.1$  Hz), 7.81-7.87 (m, 1H,  $\text{H}_7$ ), 8.01 (d, 1H,  $\text{H}_5$ ,  $J = 8.4$  Hz), 8.20 (d, 1H,  $\text{H}_8$ ,  $J = 8.9$  Hz), 8.50 (d, 2H,  $\text{H}_{10,14}$ ,  $J = 8.2$  Hz).  $^{13}\text{C}$  NMR (75 MHz,  $\text{CDCl}_3$ ):  $\delta$  (ppm) = 21.3 ( $\text{C}_{18}$ ), 54.0 ( $\text{C}_{15}$ ), 75.0 ( $\text{C}_{17}$ ), 78.3 ( $\text{C}_{16}$ ), 114.8 ( $\text{C}_{5a}$ ), 123.4 ( $\text{C}_{\text{arom}}$ ), 126.4 ( $\text{C}_{\text{arom}}$ ), 127.8 ( $\text{C}_{\text{arom}}$ ), 128.5 ( $2\text{C}_{\text{arom}}$ ), 129.2 ( $2\text{C}_{\text{arom}}$ ), 133.7 ( $\text{C}_{\text{arom}}$ ), 135.4 ( $\text{C}_9$ ), 140.8 ( $\text{C}_{12}$ ), 152.1 ( $\text{C}_{8a}$ ), 159.8 ( $\text{C}_2$ ), 165.4 ( $\text{C}_4$ ). ES-HRMS  $[\text{M}+\text{H}]^+$  calcd. ( $\text{C}_{18}\text{H}_{15}\text{N}_2\text{O}$ ) $^+$ : 275.1140, found: 275.1194.

**4c: 2-(4-methoxyphenyl)-4-(prop-2-yn-1-yloxy)benzopyrimidine**

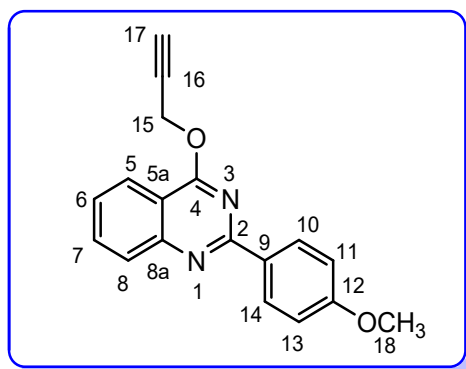

White solid; yield: 27%; mp: 137-139 °C; IR (ATR,  $\text{cm}^{-1}$ )  $\nu$ : 2127.11 ( $\text{C}\equiv\text{C}$ ), 3185.15 ( $\equiv\text{C}-\text{H}$ );  $R_f$ (cyclohexane/ EtOAc: 9/1) = 0.5.  $^1\text{H}$  NMR (300 MHz,  $\text{CDCl}_3$ ):  $\delta$  (ppm) = 2.59 (t, 1H,  $\text{H}_{17}$ ,  $J$  = 1.9 Hz), 3.91 (s, 3H,  $\text{OCH}_3$ ), 5.35 (d, 2H,  $\text{H}_{15}$ ,  $J$  = 2.2 Hz), 7.04 (d, 2H,  $\text{H}_{11-13}$ ,  $J$  = 8.8 Hz), 7.51 (t, 1H,  $\text{H}_6$ ,  $J$  = 7.5 Hz), 7.83 (t, 1H,  $\text{H}_7$ ,  $J$  = 7.4 Hz), 7.98 (d, 1H,  $\text{H}_5$ ,  $J$  = 8.4 Hz), 8.19 (d, 1H,  $\text{H}_8$ ,  $J$  = 8.1 Hz), 8.56 (d, 2H,  $\text{H}_{10-14}$ ,  $J$  = 8.8 Hz).  $^{13}\text{C}$  NMR (75 MHz,  $\text{CDCl}_3$ ):  $\delta$  (ppm) = 54.1 ( $\text{C}_{15}$ ), 55.4 ( $\text{OCH}_3$ ), 75.0 ( $\text{C}_{17}$ ), 78.3 ( $\text{C}_{16}$ ), 113.8 ( $2\text{C}_{\text{arom}}$ ), 114.7 ( $\text{C}_{5a}$ ), 123.4 ( $\text{C}_{\text{arom}}$ ), 126.2 ( $\text{C}_{\text{arom}}$ ), 127.7 ( $\text{C}_{\text{arom}}$ ), 130.1 ( $2\text{C}_{\text{arom}}$ ), 130.5 ( $\text{C}_9$ ), 133.7 ( $\text{C}_{\text{arom}}$ ), 152.1 ( $\text{C}_{8a}$ ), 159.5 ( $\text{C}_2$ ), 161.8 ( $\text{C}_{12}$ ), 165.3 ( $\text{C}_4$ ). ES-HRMS  $[\text{M}+\text{H}]^+$  calcd. ( $\text{C}_{18}\text{H}_{15}\text{N}_2\text{O}_2$ ) $^+$ : 291.1089, found: 291.1145.

**4d: 2-(3,4-dimethoxyphenyl)-4-(prop-2-yn-1-yloxy)benzopyrimidine**

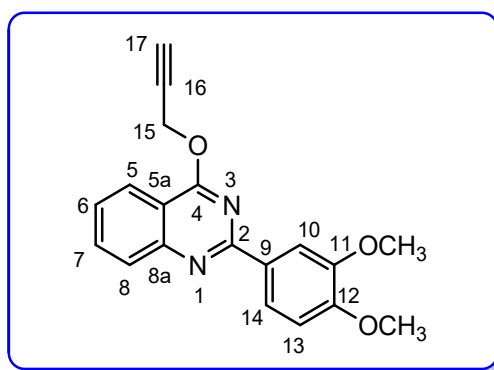

White solid; yield: 51%; mp: 143-145 °C; IR (ATR,  $\text{cm}^{-1}$ )  $\nu$ : 2117.35 ( $\text{C}\equiv\text{C}$ ), 3271.64 ( $\equiv\text{C}-\text{H}$ );  $R_f$ (cyclohexane/ EtOAc: 9/1) = 0.5.  $^1\text{H}$  NMR (300 MHz,  $\text{CDCl}_3$ ):  $\delta$  (ppm) = 2.59 (t, 1H,  $\text{H}_{17}$ ,  $J$  = 2.4 Hz), 3.99 (s, 3H,  $\text{OCH}_3$ ), 4.07 (s, 3H,  $\text{OCH}_3$ ), 5.32 (d, 2H,  $\text{H}_{15}$ ,  $J$  = 2.4 Hz), 7.00 (d, 1H,  $\text{H}_{13}$ ,  $J$  = 8.4 Hz), 7.49-7.54 (m, 1H,  $\text{H}_6$ ), 7.80-7.85 (m, 1H,  $\text{H}_7$ ), 7.98 (d, 1H,  $\text{H}_5$ ,  $J$  = 8.4 Hz), 8.17-8.21 (m, 3H,  $\text{H}_{\text{arom}}$ ).  $^{13}\text{C}$  NMR (75 MHz,  $\text{CDCl}_3$ ):  $\delta$  (ppm) = 54.1 ( $\text{C}_{15}$ ), 55.9 ( $2\text{OCH}_3$ ), 75.0 ( $\text{C}_{17}$ ), 78.3 ( $\text{C}_{16}$ ), 110.6 ( $\text{C}_{\text{arom}}$ ), 111.1 ( $\text{C}_{\text{arom}}$ ), 114.7 ( $\text{C}_{5a}$ ), 121.9 ( $\text{C}_{\text{arom}}$ ), 123.4 ( $\text{C}_{\text{arom}}$ ), 126.2 ( $\text{C}_{\text{arom}}$ ), 127.7 ( $\text{C}_{\text{arom}}$ ), 130.7 ( $\text{C}_9$ ), 133.7 ( $\text{C}_{\text{arom}}$ ), 148.9 ( $\text{C}_{12}$ ), 151.4 ( $\text{C}_{11}$ ), 152.1 ( $\text{C}_{8a}$ ), 159.4 ( $\text{C}_2$ ), 165.3 ( $\text{C}_4$ ). ES-HRMS  $[\text{M}+\text{H}]^+$  calcd. ( $\text{C}_{19}\text{H}_{17}\text{N}_2\text{O}_3$ ) $^+$ : 321.1194, found: 321.1253.

**4e: 2-(4-(tert-butyl)phenyl)-4-(prop-2-yn-1-yloxy)benzopyrimidine**

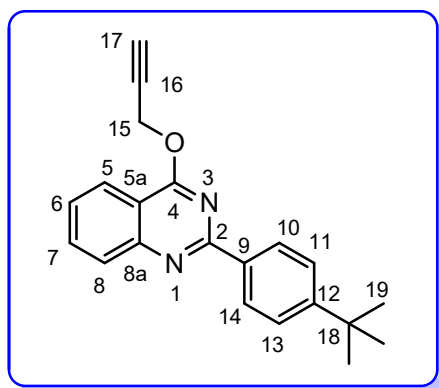

White solid; yield: 31%; mp: 120-122°C; IR (ATR,  $\text{cm}^{-1}$ )  $\nu$ : 2129.98 ( $\text{C}\equiv\text{C}$ ), 32015.20 ( $\equiv\text{C}-\text{H}$ );  $R_f$  (cyclohexane/ EtOAc: 9/1) = 0.5.  $^1\text{H}$  NMR (300 MHz,  $\text{CDCl}_3$ ):  $\delta$  (ppm) = 1.42 (s, 9H,  $\text{H}_{19}$ ), 2.59 (t, 1H,  $\text{H}_{17}$ ,  $J = 2.4$  Hz), 5.36 (d, 2H,  $\text{H}_{15}$ ,  $J = 2.4$  Hz), 7.52 (d, 1H,  $\text{H}_6$ ,  $J = 8.1$  Hz), 7.57 (d, 2H,  $\text{H}_{11-13}$ ,  $J = 8.5$  Hz), 7.82-7.87 (m, 1H,  $\text{H}_7$ ), 8.02 (d, 1H,  $\text{H}_5$ ,  $J = 8.4$  Hz), 8.21 (d, 1H,  $\text{H}_8$ ,  $J = 9.0$  Hz), 8.53 (d, 2H,  $\text{H}_{10-14}$ ,  $J = 8.6$  Hz).  $^{13}\text{C}$  NMR (75 MHz,  $\text{CDCl}_3$ ):  $\delta$  (ppm) = 31.6 ( $\text{C}_{19}$ ), 34.8 ( $\text{C}_{18}$ ), 54.2 ( $\text{C}_{15}$ ), 75.0 ( $\text{C}_{17}$ ), 78.3 ( $\text{C}_{16}$ ), 110.6 ( $\text{C}_{\text{arom}}$ ), 111.1 ( $\text{C}_{\text{arom}}$ ), 114.9 ( $\text{C}_{5a}$ ), 123.4 ( $\text{C}_{\text{arom}}$ ), 125.5 ( $2\text{C}_{\text{arom}}$ ), 126.4 ( $\text{C}_{\text{arom}}$ ), 127.9 ( $\text{C}_{\text{arom}}$ ), 128.3 ( $2\text{C}_{\text{arom}}$ ), 133.7 ( $\text{C}_{\text{arom}}$ ), 135.2 ( $\text{C}_9$ ), 152.4 ( $\text{C}_{11}$ ), 152.1 ( $\text{C}_{8a}$ ), 153.8 ( $\text{C}_{12}$ ), 159.8 ( $\text{C}_2$ ), 165.4 ( $\text{C}_4$ ). ES-HRMS  $[\text{M}+\text{H}]^+$  calcd. ( $\text{C}_{21}\text{H}_{21}\text{N}_2\text{O}$ ) $^+$ : 317.1609, found: 317.1664.

**4f: 2-(4-chlorophenyl)-4-(prop-2-yn-1-yloxy)benzopyrimidine**

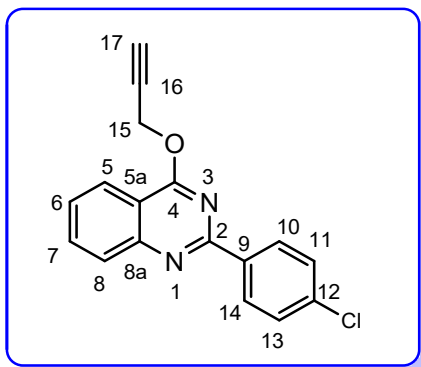

White solid; yield: 73%; mp: 198-200 °C; IR (ATR,  $\text{cm}^{-1}$ )  $\nu$ : 2124.10 ( $\text{C}\equiv\text{C}$ ), 3208.15 ( $\equiv\text{C}-\text{H}$ );  $R_f$  (cyclohexane/ EtOAc: 9/1) = 0.5.  $^1\text{H}$  NMR (300 MHz,  $\text{CDCl}_3$ ):  $\delta$  (ppm) = 2.59 (t, 1H,  $\text{H}_{17}$ ,  $J = 2.4$  Hz), 5.35 (d, 2H,  $\text{H}_{15}$ ,  $J = 2.4$  Hz), 7.49 (d, 2H,  $\text{H}_{10-14}$ ,  $J = 8.7$  Hz), 7.54-7.60 (m, 1H,  $\text{H}_6$ ), 7.84-7.90 (m, 1H,  $\text{H}_7$ ), 8.01 (d, 1H,  $\text{H}_5$ ,  $J = 8.4$  Hz), 8.22 (d, 1H,  $\text{H}_8$ ,  $J = 7.4$  Hz), 8.56 (d, 2H,  $\text{H}_{11-13}$ ,  $J = 6.8$  Hz).  $^{13}\text{C}$  NMR (75 MHz,  $\text{CDCl}_3$ ):  $\delta$  (ppm) = 54.3 ( $\text{C}_{15}$ ), 75.2 ( $\text{C}_{17}$ ), 78.1 ( $\text{C}_{16}$ ), 114.9 ( $\text{C}_{5a}$ ), 123.5 ( $\text{C}_{\text{arom}}$ ), 126.8 ( $\text{C}_{\text{arom}}$ ), 127.9 ( $\text{C}_{\text{arom}}$ ), 128.6 ( $2\text{C}_{\text{arom}}$ ), 129.8 ( $2\text{C}_{\text{arom}}$ ), 133.9 ( $\text{C}_{\text{arom}}$ ), 136.3 ( $\text{C}_9$ ), 136.8 ( $\text{C}_{12}$ ), 151.9 ( $\text{C}_{8a}$ ), 159.6 ( $\text{C}_2$ ), 165.6 ( $\text{C}_4$ ). ES-HRMS  $[\text{M}+\text{H}]^+$  calcd. ( $\text{C}_{17}\text{H}_{12}\text{ClN}_2\text{O}$ ) $^+$ : 295.0644, found: 295.0684.

**4g: 2-(4-fluorophenyl)-4-(prop-2-yn-1-yloxy)benzopyrimidine**

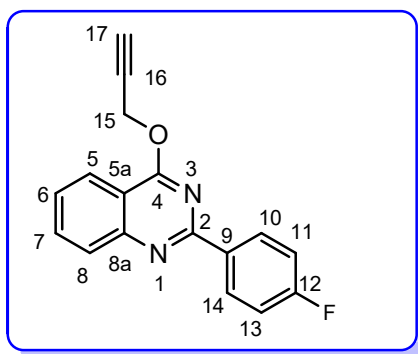

White solid; yield: 65%; mp: 168-170°C; IR (ATR,  $\text{cm}^{-1}$ )  $\nu$ : 2127.348 ( $\text{C}\equiv\text{C}$ ), 3196.48 ( $\equiv\text{C}-\text{H}$ );  $R_f$  (cyclohexane/ EtOAc: 9/1) = 0.5.  $^1\text{H}$  NMR (300 MHz,  $\text{CDCl}_3$ ):  $\delta$  (ppm) = 2.59 (t, 1H,  $\text{H}_{17}$ ,  $J$  = 2.4 Hz), 5.35 (d, 2H,  $\text{H}_{15}$ ,  $J$  = 2.4 Hz), 7.21 (t, 2H,  $\text{H}_{\text{arom}}$ ,  $J$  = 8.7 Hz), 7.56 (t, 1H,  $\text{H}_6$ ,  $J$  = 7.6 Hz), 7.86 (t, 1H,  $\text{H}_7$ ,  $J$  = 8.2 Hz), 8.00 (d, 1H,  $\text{H}_5$ ,  $J$  = 8.4 Hz), 8.22 (d, 1H,  $\text{H}_8$ ,  $J$  = 8.2 Hz), 8.59-8.64 (m, 2H,  $\text{H}_{\text{arom}}$ ).  $^{13}\text{C}$  NMR (75 MHz,  $\text{CDCl}_3$ ):  $\delta$  (ppm) = 54.2 ( $\text{C}_{15}$ ), 75.1 ( $\text{C}_{17}$ ), 78.1 ( $\text{C}_{16}$ ), 114.8 ( $\text{C}_{5a}$ ), 115.4 (d,  $J$  = 21.6 Hz,  $\text{C}_{11} + \text{C}_{13}$ ), 123.5 ( $\text{C}_{\text{arom}}$ ), 126.6 ( $\text{C}_{\text{arom}}$ ), 127.9 ( $\text{C}_{\text{arom}}$ ), 130.6 (d,  $J$  = 8.6 Hz,  $\text{C}_{10} + \text{C}_{14}$ ), 133.8 ( $\text{C}_{\text{arom}}$ ), 134.0 (d,  $J$  = 3 Hz,  $\text{C}_9$ ), 152.0 ( $\text{C}_{8a}$ ), 158.7 ( $\text{C}_2$ ), 164.6 (d,  $J$  = 249.0 Hz,  $\text{C}_{12}$ ), 165.6 ( $\text{C}_4$ ). ES-HRMS  $[\text{M}+\text{H}]^+$  calcd. ( $\text{C}_{17}\text{H}_{12}\text{FN}_2\text{O}$ ) $^+$ : 279.0889, found: 279.0944.

**4h: 2-(3-bromophenyl)-4-(prop-2-yn-1-yloxy)benzopyrimidine**

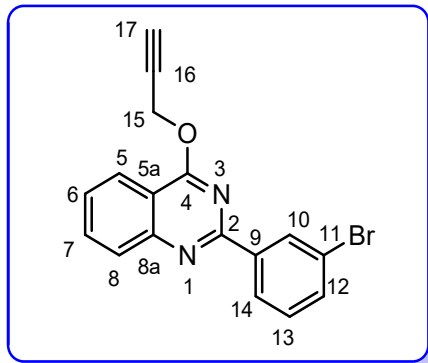

White solid; yield: 68%; mp: 152-154 °C; IR (ATR,  $\text{cm}^{-1}$ )  $\nu$ : 2134.15 ( $\text{C}\equiv\text{C}$ ), 3293.32 ( $\equiv\text{C}-\text{H}$ );  $R_f$  (cyclohexane/ EtOAc: 9/1) = 0.5.  $^1\text{H}$  NMR (300 MHz,  $\text{CDCl}_3$ ):  $\delta$  (ppm) = 2.61 (t, 1H,  $\text{H}_{17}$ ,  $J$  = 2.4 Hz), 5.36 (d, 2H,  $\text{H}_{15}$ ,  $J$  = 2.4 Hz), 7.41 (t, 1H,  $\text{H}_{\text{arom}}$ ,  $J$  = 7.9 Hz), 7.56-7.66 (m, 2H,  $\text{H}_{\text{arom}}$ ), 7.87-7.91 (m, 1H,  $\text{H}_{\text{arom}}$ ), 8.02 (d, 1H,  $\text{H}_5$ ,  $J$  = 8.3 Hz), 8.23 (d, 1H,  $\text{H}_8$ ,  $J$  = 9.0 Hz), 8.53-8.56 (m, 1H,  $\text{H}_{\text{arom}}$ ), 8.75 (t, 1H,  $\text{H}_{\text{arom}}$ ,  $J$  = 1.7 Hz).  $^{13}\text{C}$  NMR (75 MHz,  $\text{CDCl}_3$ ):  $\delta$  (ppm) = 54.4 ( $\text{C}_{15}$ ), 75.2 ( $\text{C}_{17}$ ), 78.0 ( $\text{C}_{16}$ ), 115.1 ( $\text{C}_{5a}$ ), 122.7 ( $\text{C}_{11}$ ), 123.5 ( $\text{C}_{\text{arom}}$ ), 127.0 ( $\text{C}_{\text{arom}}$ ), 127.1 ( $\text{C}_{\text{arom}}$ ), 128.0 ( $\text{C}_{\text{arom}}$ ), 129.9 ( $\text{C}_{\text{arom}}$ ), 131.4 ( $\text{C}_{\text{arom}}$ ), 133.4 ( $\text{C}_{\text{arom}}$ ), 133.9 ( $\text{C}_{\text{arom}}$ ), 139.9 ( $\text{C}_9$ ), 151.9 ( $\text{C}_{8a}$ ), 158.2 ( $\text{C}_2$ ), 165.6 ( $\text{C}_4$ ). ES-HRMS  $[\text{M}+\text{H}]^+$  calcd. ( $\text{C}_{17}\text{H}_{12}\text{BrN}_2\text{O}$ ) $^+$ : 339.0097, found: 339.0147.

**IV. General procedure for the synthesis of the cyclo-adducts 5a-h and 6a-h**

To a stirred solution of dipolarophiles **3** or **4** (0.045 mmol) and trifluoroacetic acid (0.2 equiv.) in dry THF (3 mL), *N*-benzyl-*N*-methoxymethyl-(trimethylsilyl)methylamine (3 mmol) was added dropwise at room temperature for 3 h. The resulting mixture was concentrated under reduced pressure. The residue was purified by silica gel flash column chromatography to give the pure cycloadducts **5** and **6**.

**5a: 3-((1-benzyl-2,5-dihydro-1H-pyrrol-3-yl)methyl)-2-phénylbenzopyrimidin-4(3H)-one**

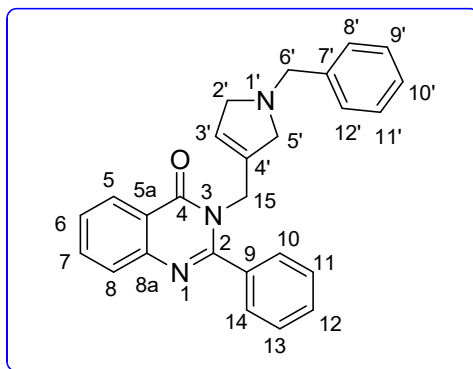

White solid; yield: 73%; mp: 99-101 °C; IR (ATR, cm<sup>-1</sup>)  $\nu$ : 1666.88 (C=O);  $R_f$  (cyclohexane/EtOAc: 7/3) = 0.5. <sup>1</sup>H NMR (300 MHz, CDCl<sub>3</sub>):  $\delta$  (ppm) = 3.24-3.28 (m, 2H, H<sub>5'</sub>), 3.34-3.38 (m, 2H, H<sub>2'</sub>), 3.67 (s, 2H, H<sub>6'</sub>), 4.59 (s, 2H, H<sub>15</sub>), 5.17-5.20 (m, 1H, H<sub>3'</sub>), 7.13-7.24 (m, 5H, H<sub>arom</sub>), 7.38-7.48 (m, 6H, H<sub>arom</sub>), 7.67-7.75 (m, 2H, H<sub>arom</sub>), 8.26 (d, 1H, H<sub>5</sub>,  $J$  = 8.3 Hz). <sup>13</sup>C NMR (75 MHz, CDCl<sub>3</sub>):  $\delta$  (ppm) = 44.4 (C<sub>15</sub>), 59.6-60.3 (C<sub>5</sub>+C<sub>2'</sub>), 60.4 (C<sub>6'</sub>), 120.6 (C<sub>5a</sub>), 124.1 (C<sub>arom</sub>), 126.9 (C<sub>arom</sub>), 127.0 (C<sub>arom</sub>), 127.1 (C<sub>arom</sub>), 127.5 (C<sub>arom</sub>), 127.9 (2C<sub>arom</sub>), 128.3 (2C<sub>arom</sub>), 128.5 (2C<sub>arom</sub>), 128.6 (2C<sub>arom</sub>), 130.0 (C<sub>arom</sub>), 134.5 (C<sub>3'</sub>), 135.1 (C<sub>9</sub>), 136.6 (C<sub>7'</sub>), 139.2 (C<sub>4'</sub>), 147.2 (C<sub>8a</sub>), 156.1 (C<sub>2</sub>), 162.0 (C<sub>4</sub>). ES-HRMS [M+H]<sup>+</sup> calcd. (C<sub>26</sub>H<sub>24</sub>N<sub>3</sub>O)<sup>+</sup>: 394.1875, found: 394.1933.

**5b: 3-((1-benzyl-2,5-dihydro-1H-pyrrol-3-yl)methyl)-2-(p-tolyl)benzopyrimidin-4(3H)-one**

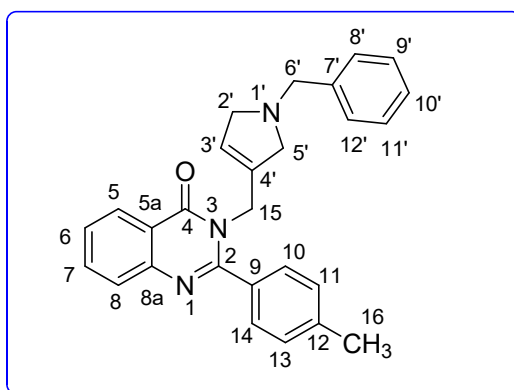

White solid; yield: 95%; mp: 94-96 °C; IR (ATR, cm<sup>-1</sup>)  $\nu$ : 1671.31 (C=O);  $R_f$  (cyclohexane/EtOAc: 7/3) = 0.5. <sup>1</sup>H NMR (300 MHz, CDCl<sub>3</sub>):  $\delta$  (ppm) = 2.35 (s, 3H, H<sub>16</sub>), 3.25-3.29 (m, 2H, H<sub>5'</sub>), 3.35-3.39 (m, 2H, H<sub>2'</sub>), 3.67 (s, 2H, H<sub>6'</sub>), 4.58 (s, 2H, H<sub>15</sub>), 5.20-5.21 (m, 1H, H<sub>3'</sub>), 7.13-7.23 (m, 7H, H<sub>arom</sub>), 7.34 (d, 2H, H<sub>arom</sub>,  $J$  = 8.0 Hz), 7.40-7.47 (m, 1H, H<sub>arom</sub>), 7.63-7.71 (m, 2H, H<sub>arom</sub>), 8.24 (d, 1H, H<sub>5</sub>,  $J$  = 8.2 Hz). <sup>13</sup>C NMR (75 MHz, CDCl<sub>3</sub>):  $\delta$  (ppm) = 21.4 (C<sub>16</sub>), 44.5 (C<sub>15</sub>), 59.7-60.3 (C<sub>5</sub>+C<sub>2'</sub>), 60.4 (C<sub>6'</sub>), 120.6 (C<sub>5a</sub>), 123.9 (C<sub>arom</sub>), 126.9 (C<sub>arom</sub>), 127.0

(C<sub>arom</sub>), 127.5 (C<sub>arom</sub>), 127.9 (2C<sub>arom</sub>), 128.3 (2C<sub>arom</sub>), 128.5 (2C<sub>arom</sub>), 129.2 (2C<sub>arom</sub>), 132.3 (C<sub>9</sub>), 134.4 (C<sub>3'</sub>), 136.7 (C<sub>12</sub>), 139.1 (C<sub>7'</sub>), 140.1 (C<sub>4'</sub>), 147.3 (C<sub>8a</sub>), 156.3 (C<sub>2</sub>), 162.0 (C<sub>4</sub>). ES-HRMS [M+H]<sup>+</sup> calcd. (C<sub>27</sub>H<sub>26</sub>N<sub>3</sub>O)<sup>+</sup>: 408.2031, found: 408.2092.

**5c: 3-((1-benzyl-2,5-dihydro-1H-pyrrol-3-yl)méthyl)-2-(4-methoxyphenyl)benzopyrimidin-4(3H)-one**

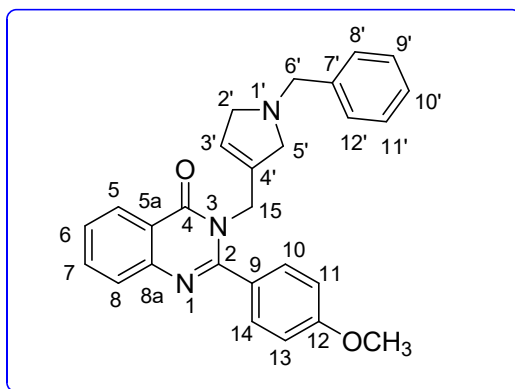

Yellow oil; yield: 52%; IR (ATR, cm<sup>-1</sup>)  $\nu$ : 1671.62 (C=O); R<sub>f</sub> (cyclohexane/ EtOAc: 7/3) = 0.5. <sup>1</sup>H NMR (300 MHz, CDCl<sub>3</sub>):  $\delta$  (ppm) = 3.37-3.46 (m, 2H, H<sub>5'</sub>), 3.47-3.50 (m, 2H, H<sub>2'</sub>), 3.78 (s, 2H, H<sub>6'</sub>), 3.89 (s, 3H, OCH<sub>3</sub>), 4.69 (s, 2H, H<sub>15</sub>), 5.30-5.33 (m, 1H, H<sub>3'</sub>), 6.99 (d, 2H, H<sub>arom</sub>,  $J$  = 8.8 Hz), 7.25-7.37 (m, 5H, H<sub>arom</sub>), 7.50-7.55 (m, 3H, H<sub>arom</sub>), 7.47-7.81 (m, 2H, H<sub>arom</sub>), 8.33 (d, 1H, H<sub>5</sub>,  $J$  = 8.3 Hz). <sup>13</sup>C NMR (75 MHz, CDCl<sub>3</sub>):  $\delta$  (ppm) = 44.6 (C<sub>15</sub>), 55.4 (OCH<sub>3</sub>), 59.7-60.3 (C<sub>5</sub>+C<sub>2'</sub>), 60.4 (C<sub>6'</sub>), 114.0 (2C<sub>arom</sub>), 120.5 (C<sub>5a</sub>), 123.8 (C<sub>arom</sub>), 126.9 (C<sub>arom</sub>), 126.9 (C<sub>arom</sub>), 127.0 (C<sub>arom</sub>), 127.5 (C<sub>arom</sub>), 127.6 (C<sub>9</sub>), 128.3 (2C<sub>arom</sub>), 128.6 (2C<sub>arom</sub>), 129.6 (2C<sub>arom</sub>), 134.4 (C<sub>3'</sub>), 136.8 (C<sub>7'</sub>), 139.1 (C<sub>4'</sub>), 147.3 (C<sub>8a</sub>), 156.0 (C<sub>2</sub>), 160.8 (C<sub>12</sub>), 162.1 (C<sub>4</sub>). ES-HRMS [M+H]<sup>+</sup> calcd. (C<sub>27</sub>H<sub>26</sub>N<sub>3</sub>O<sub>2</sub>)<sup>+</sup>: 424.1980, found: 424.2041.

**5d: 3-((1-benzyl-2,5-dihydro-1H-pyrrol-3-yl)methyl)-2-(3,4-dimethoxyphenyl)benzopyrimidin-4(3H)-one**

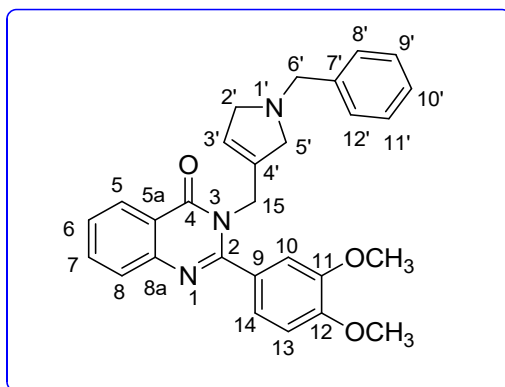

White solid; yield: 60%; mp: 140-142 °C; IR (ATR, cm<sup>-1</sup>)  $\nu$ : 1671.83 (C=O); R<sub>f</sub> (cyclohexane/ EtOAc: 7/3) = 0.5. <sup>1</sup>H NMR (300 MHz, CDCl<sub>3</sub>):  $\delta$  (ppm) = 3.37-3.40 (m, 2H, H<sub>5'</sub>), 3.46-3.49 (m, 2H, H<sub>2'</sub>), 3.77 (s, 2H, H<sub>6'</sub>), 3.91 (s, 3H, OCH<sub>3</sub>), 3.95 (s, 3H, OCH<sub>3</sub>), 4.65 (s, 2H, H<sub>15</sub>), 5.36-5.38 (m, 1H, H<sub>3'</sub>), 6.96 (d, 1H, H<sub>arom</sub>,  $J$  = 8.5 Hz), 7.11-7.17 (m, 2H, H<sub>arom</sub>), 7.20-7.31 (m, 5H, H<sub>arom</sub>), 7.48-7.54 (m, 1H, H<sub>arom</sub>), 7.74-7.82 (m, 2H, H<sub>arom</sub>), 8.32 (d, 1H, H<sub>5</sub>,  $J$  = 6.1 Hz). <sup>13</sup>C NMR (75 MHz, CDCl<sub>3</sub>):  $\delta$  (ppm) = 45.0 (C<sub>15</sub>), 55.9 (OCH<sub>3</sub>), 56.0 (OCH<sub>3</sub>), 59.7-60.2 (C<sub>5</sub>+C<sub>2'</sub>),

60.4 (C<sub>6'</sub>), 110.9 (C<sub>arom</sub>), 111.0 (C<sub>arom</sub>), 120.5 (C<sub>5a</sub>), 120.9 (C<sub>arom</sub>), 123.7 (C<sub>arom</sub>), 126.9 (C<sub>arom</sub>), 127.0 (C<sub>arom</sub>), 127.0 (C<sub>arom</sub>), 127.5 (C<sub>arom</sub>), 127.6 (C<sub>9</sub>), 128.3 (2C<sub>arom</sub>), 128.5 (2C<sub>arom</sub>), 134.4 (C<sub>3'</sub>), 137.2 (C<sub>7'</sub>), 139.2 (C<sub>4'</sub>), 147.2 (C<sub>8a</sub>), 148.8 (C<sub>11</sub>), 150.4 (C<sub>12</sub>), 156.0 (C<sub>2</sub>), 162.1 (C<sub>4</sub>). ES-HRMS [M+H]<sup>+</sup> calcd. (C<sub>28</sub>H<sub>28</sub>N<sub>3</sub>O<sub>3</sub>)<sup>+</sup>: 454.2086, found: 454.2146.

**5e: 3-((1-benzyl-2,5-dihydro-1H-pyrrol-3-yl)methyl)-2-(4-(tert-butyl)phenyl)quinazolin-4(3H)-one**

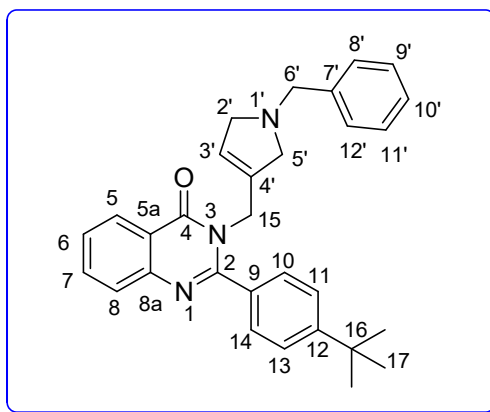

White solid; yield: 73%; mp: 179-181 °C; IR (ATR, cm<sup>-1</sup>) v: 1666.02 (C=O); R<sub>f</sub> (cyclohexane/EtOAc: 7/3) = 0.5. <sup>1</sup>H NMR (300 MHz, CDCl<sub>3</sub>): δ (ppm) = 1.18 (s, 9H, H<sub>17</sub>), 3.15-3.25 (m, 2H, H<sub>5'</sub>), 3.26-3.28 (m, 2H, H<sub>2'</sub>), 3.57 (s, 2H, H<sub>6'</sub>), 4.49 (s, 2H, H<sub>15</sub>), 5.09-5.11 (m, 1H, H<sub>3'</sub>), 7.02-7.12 (m, 5H, H<sub>arom</sub>), 7.26-7.35 (m, 5H, H<sub>arom</sub>), 7.55-7.61 (m, 2H, H<sub>arom</sub>), 8.13 (d, 1H, H<sub>5</sub>, J = 7.7 Hz). <sup>13</sup>C NMR (75 MHz, CDCl<sub>3</sub>): δ (ppm) = 31.2 (C<sub>17</sub>), 34.9 (C<sub>16</sub>), 44.5 (C<sub>15</sub>), 59.7-60.3 (C<sub>5'+C<sub>2'</sub></sub>), 60.5 (C<sub>6'</sub>), 120.6 (C<sub>5a</sub>), 123.8 (C<sub>arom</sub>), 125.6 (2C<sub>arom</sub>), 126.9 (C<sub>arom</sub>), 127.0 (C<sub>arom</sub>), 127.0 (C<sub>arom</sub>), 127.5 (C<sub>arom</sub>), 127.7 (2C<sub>arom</sub>), 128.3 (2C<sub>arom</sub>), 128.6 (2C<sub>arom</sub>), 132.2 (C<sub>9</sub>), 134.4 (C<sub>3'</sub>), 136.8 (C<sub>7'</sub>), 139.2 (C<sub>4'</sub>), 147.3 (C<sub>8a</sub>), 153.3 (C<sub>12</sub>), 156.3 (C<sub>2</sub>), 162.0 (C<sub>4</sub>). ES-HRMS [M+H]<sup>+</sup> calcd. (C<sub>30</sub>H<sub>32</sub>N<sub>3</sub>O)<sup>+</sup>: 450.2501, found: 450.2552.

**5f: 3-((1-benzyl-2,5-dihydro-1H-pyrrol-3-yl)methyl)-2-(4-chlorophenyl)benzopyrimidin-4(3H)-one**

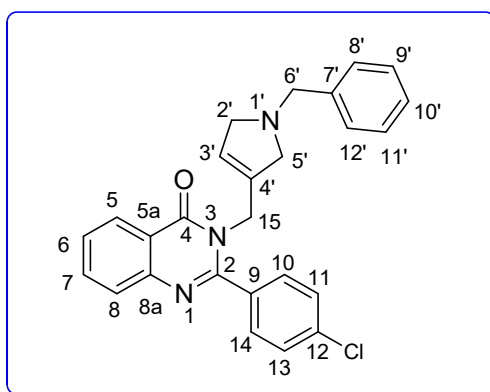

White solid; yield: 62%; mp: 127-129 °C; IR (ATR, cm<sup>-1</sup>) v: 1667.94 (C=O); R<sub>f</sub> (cyclohexane/EtOAc: 7/3) = 0.5. <sup>1</sup>H NMR (300 MHz, CDCl<sub>3</sub>): δ (ppm) = 3.51-3.54 (m, 2H, H<sub>5'</sub>), 3.55-3.63 (m, 2H, H<sub>2'</sub>), 3.68 (s, 2H, H<sub>6'</sub>), 5.20 (s, 2H, H<sub>15</sub>), 5.87-5.89 (m, 1H, H<sub>3'</sub>), 7.19-7.31 (m, 5H, H<sub>arom</sub>), 7.38 (d, 2H, J = 7.4 Hz, H<sub>arom</sub>), 7.42-7.47 (m, 1H, H<sub>arom</sub>), 7.72-7.78 (m, 1H, H<sub>arom</sub>), 7.89 (d, 1H, J = 8.2 Hz, H<sub>arom</sub>), 8.08 (d, 1H, J = 8.2 Hz, H<sub>arom</sub>), 8.42 (d, 2H, J = 7.4 Hz, H<sub>arom</sub>). <sup>13</sup>C



NMR (75 MHz, CDCl<sub>3</sub>):  $\delta$  (ppm) = 59.8 (C<sub>15</sub>), 60.2 (C<sub>5'</sub>), 60.4 (C<sub>6'</sub>), 63.7 (C<sub>2'</sub>), 115.2 (C<sub>5a</sub>), 123.5 (C<sub>arom</sub>), 125.8 (C<sub>arom</sub>), 126.6 (C<sub>arom</sub>), 127.1 (C<sub>arom</sub>), 127.9 (C<sub>arom</sub>), 128.4 (2C<sub>arom</sub>), 128.6 (2C<sub>arom</sub>), 128.7 (2C<sub>arom</sub>), 129.7 (2C<sub>arom</sub>), 133.7 (C<sub>9</sub>), 136.5 (C<sub>3'</sub>), 136.6 (C<sub>12</sub>), 136.7 (C<sub>7'</sub>), 139.1 (C<sub>4'</sub>), 151.8 (C<sub>8a</sub>), 158.8 (C<sub>2</sub>), 166.3 (C<sub>4</sub>). ES-HRMS [M+H]<sup>+</sup> calcd. (C<sub>26</sub>H<sub>23</sub>ClN<sub>3</sub>O)<sup>+</sup>: 428.1496, found: 428.1546.

**5g: 3-((1-benzyl-2,5-dihydro-1H-pyrrol-3-yl)méthyl)-2-(4-fluorophényl)benzopyrimidin-4(3H)-one**

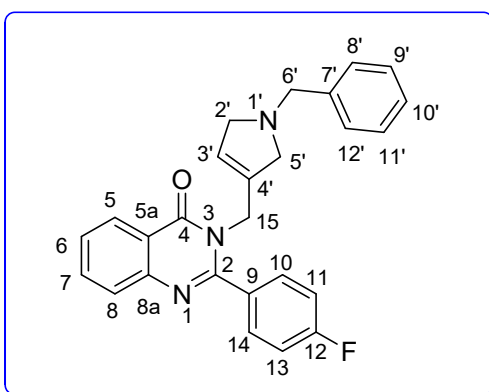

White solid; yield: 93%; mp: 124-126 °C; IR (ATR, cm<sup>-1</sup>)  $\nu$ : 1665,83 (C=O); R<sub>f</sub> (cyclohexane/EtOAc: 7/3) = 0.5. <sup>1</sup>H NMR (300 MHz, CDCl<sub>3</sub>):  $\delta$  (ppm) = 3.35-3.38 (m, 2H, H<sub>5'</sub>), 3.45-3.48 (m, 2H, H<sub>2'</sub>), 3.37 (s, 2H, H<sub>6'</sub>), 4.65 (s, 2H, H<sub>15</sub>), 5.28-5.31 (m, 1H, H<sub>3'</sub>), 7.17-7.33 (m, 7H, H<sub>arom</sub>), 7.52-7.59 (m, 3H, H<sub>arom</sub>), 7.74-7.83 (m, 2H, H<sub>arom</sub>), 8.35 (d, 1H, H<sub>5</sub>,  $J$  = 8.3 Hz). <sup>13</sup>C NMR (75 MHz, CDCl<sub>3</sub>):  $\delta$  (ppm) = 44.5 (C<sub>15</sub>), 59.7 (C<sub>5'</sub> or C<sub>2'</sub>), 60.3 (C<sub>5'</sub> or C<sub>2'</sub>), 60.4 (C<sub>6'</sub>), 115.8 (d,  $J$  = 22.0 Hz, C<sub>11</sub> + C<sub>13</sub>), 120.6 (C<sub>5a</sub>), 124.1 (C<sub>arom</sub>), 127.0 (C<sub>arom</sub>), 127.1 (C<sub>arom</sub>), 127.3 (C<sub>arom</sub>), 127.5 (C<sub>arom</sub>), 128.4 (2C<sub>arom</sub>), 128.6 (2C<sub>arom</sub>), 130.2 (d,  $J$  = 8.5 Hz, C<sub>10</sub> + C<sub>14</sub>), 131.2 (d,  $J$  = 3.6 Hz, C<sub>9</sub>), 134.6 (C<sub>3'</sub>), 136.7 (C<sub>4'</sub>), 139.1 (C<sub>7'</sub>), 147.1 (C<sub>8a</sub>), 155.2 (C<sub>2</sub>), 161.9 (C<sub>4</sub>), 163.5 (d,  $J$  = 250.0 Hz, C<sub>12</sub>). ES-HRMS [M+H]<sup>+</sup> calcd. (C<sub>26</sub>H<sub>23</sub>FN<sub>3</sub>O)<sup>+</sup>: 412.1780, found :412.1833.

**5h: 3-((1-benzyl-2,5-dihydro-1H-pyrrol-3-yl)méthyl)-2-(3-bromophényl)benzopyrimidin-4(3H)-one**

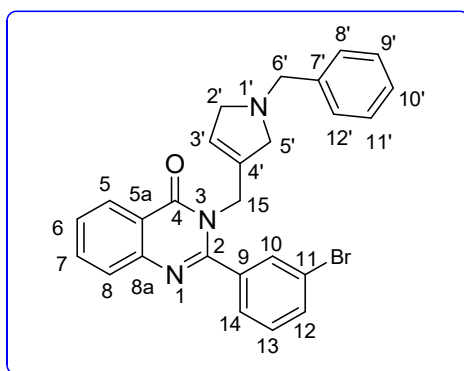

White solid; yield: 80%; mp: 107-109 °C; IR (ATR, cm<sup>-1</sup>)  $\nu$ : 1667.90 (C=O); R<sub>f</sub> (cyclohexane/EtOAc: 7/3) = 0.5. <sup>1</sup>H NMR (300 MHz, CDCl<sub>3</sub>):  $\delta$  (ppm) = 3.36-3.39 (m, 2H, H<sub>5'</sub>), 3.47-3.49 (m, 2H, H<sub>2'</sub>), 3.78 (s, 2H, H<sub>6'</sub>), 4.64 (s, 2H, H<sub>15</sub>), 5.30-5.31 (m, 1H, H<sub>3'</sub>), 7.24-7.36 (m, 6H, H<sub>arom</sub>), 7.39-7.41 (m, 1H, H<sub>arom</sub>), 7.49-7.58 (m, 2H, H<sub>arom</sub>), 7.66-7.84 (m, 4H, H<sub>arom</sub>), 8.36 (d, 1H, H<sub>5</sub>,  $J$  = 8.3 Hz). <sup>13</sup>C NMR (75 MHz, CDCl<sub>3</sub>):  $\delta$  (ppm) = 44.5 (C<sub>15</sub>), 59.6 (C<sub>5'</sub>)-60.3 (C<sub>2'</sub>),

60.4 (C<sub>6'</sub>), 120.7 (C<sub>5a</sub>), 122.6 (C<sub>11</sub>), 124.5 (C<sub>arom</sub>), 126.5 (C<sub>arom</sub>), 127.0 (2C<sub>arom</sub>), 127.4 (C<sub>arom</sub>), 127.6 (C<sub>arom</sub>), 128.3 (2C<sub>arom</sub>), 128.5 (2C<sub>arom</sub>), 130.2 (C<sub>arom</sub>), 131.2 (C<sub>arom</sub>), 133.1 (C<sub>arom</sub>), 134.7 (C<sub>3'</sub>), 136.6 (C<sub>9</sub>), 136.8 (C<sub>7'</sub>), 139.1 (C<sub>4'</sub>), 147.0 (C<sub>8a</sub>), 154.5 (C<sub>2</sub>), 161.8 (C<sub>4</sub>). ES-HRMS [M+H]<sup>+</sup> calcd. (C<sub>26</sub>H<sub>23</sub>BrN<sub>3</sub>O)<sup>+</sup>: 472.0971, found: 472.1021.

**6a: 4-((1-benzyl-2,5-dihydro-1H-pyrrol-3-yl)methoxy)-2-phenylbenzopyrimidine**

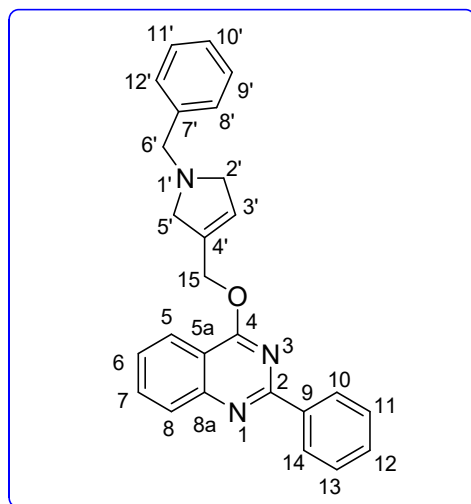

White solid; yield: 85%; mp: 97-99 °C; R<sub>f</sub> (cyclohexane/ EtOAc: 9/1) = 0.5. <sup>1</sup>H NMR (300 MHz, CDCl<sub>3</sub>): δ (ppm) = 3.53-3.56 (m, 2H, H<sub>5'</sub>), 3.62-3.79 (m, 2H, H<sub>2'</sub>), 3.79 (s, 2H, H<sub>6'</sub>), 5.23 (s, 2H, H<sub>15</sub>), 5.87-5.89 (m, 1H, H<sub>3'</sub>), 7.16-7.32 (m, 4H, H<sub>arom</sub>), 7.43-7.47 (m, 4H, H<sub>arom</sub>), 7.72-7.78 (M, 1H, H<sub>6</sub>), 7.92 (d, 1H, H<sub>7</sub>, J = 8.3 Hz), 8.09 (d, 1H, H<sub>5</sub>, J = 7.8 Hz), 8.48-8.51 (m, 2H, H<sub>arom</sub>). <sup>13</sup>C NMR (75 MHz, CDCl<sub>3</sub>): δ (ppm) = 59.8 (C<sub>5'</sub>), 60.2 (C<sub>2'</sub>), 60.4 (C<sub>6'</sub>), 63.6 (C<sub>15</sub>), 115.2 (C<sub>5a</sub>), 123.5 (C<sub>arom</sub>), 125.6 (C<sub>arom</sub>), 126.5 (C<sub>arom</sub>), 127.1 (C<sub>arom</sub>), 128.0 (C<sub>arom</sub>), 128.4 (2C<sub>arom</sub>), 128.5 (4C<sub>arom</sub>), 128.7 (2C<sub>arom</sub>), 130.5 (C<sub>arom</sub>), 133.6 (C<sub>3'</sub>), 136.8 (C<sub>7'</sub>), 138.0 (C<sub>9</sub>), 139.0 (C<sub>4'</sub>), 151.9 (C<sub>8a</sub>), 159.9 (C<sub>2</sub>), 166.3 (C<sub>4</sub>). ES-HRMS [M+H]<sup>+</sup> calcd. (C<sub>26</sub>H<sub>24</sub>N<sub>3</sub>O)<sup>+</sup>: 394.1875, found: 394.1926.

**6b: 4-((1-benzyl-2,5-dihydro-1H-pyrrol-3-yl)methoxy)-2-(p-tolyl)benzopyrimidine**

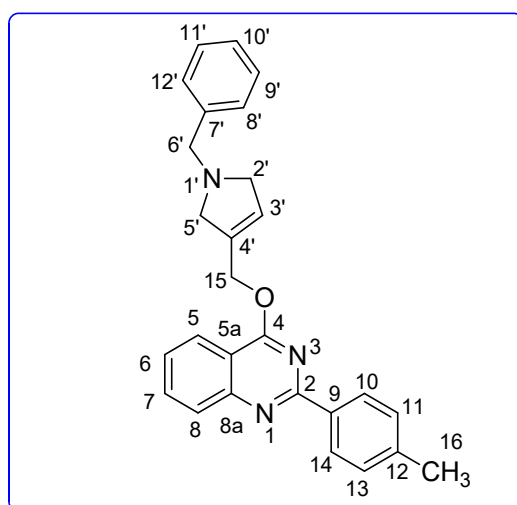

White solid; yield: 87%; mp: 104-106 °C;  $R_f$  (cyclohexane/ EtOAc: 9/1) = 0.5.  $^1\text{H}$  NMR (300 MHz,  $\text{CDCl}_3$ ):  $\delta$  (ppm) = 2.37 (s, 3H,  $\text{H}_{16}$ ), 3.53-3.54 (m, 2H,  $\text{H}_{5'}$ ), 3.61-3.64 (m, 2H,  $\text{H}_{2'}$ ), 3.79 (s, 2H,  $\text{H}_{6'}$ ), 5.23 (s, 2H,  $\text{H}_{15}$ ), 5.88-5.89 (m, 1H), 7.19-7.32 (m, 7H,  $\text{H}_{\text{arom}}$ ), 7.43 (t, 1H,  $\text{H}_6$ ,  $J = 7.4$  Hz), 7.74 (t, 1H,  $\text{H}_7$ ,  $J = 7.2$  Hz), 7.90 (d, 1H,  $\text{H}_5$ ,  $J = 8.4$  Hz), 8.08 (d, 1H,  $\text{H}_8$ ,  $J = 8.1$  Hz), 8.38 (d, 2H,  $\text{H}_{\text{arom}}$ ,  $J = 8.1$  Hz).  $^{13}\text{C}$  NMR (75 MHz,  $\text{CDCl}_3$ ):  $\delta$  (ppm) = 21.5 ( $\text{C}_{16}$ ), 59.8 ( $\text{C}_{5'}$ ), 60.2 ( $\text{C}_{2'}$ ), 60.4 ( $\text{C}_{6'}$ ), 63.6 ( $\text{C}_{15}$ ), 115.1 ( $\text{C}_{5a}$ ), 123.4 ( $\text{C}_{\text{arom}}$ ), 125.6 ( $\text{C}_{\text{arom}}$ ), 126.2 ( $\text{C}_{\text{arom}}$ ), 127.1 ( $\text{C}_{\text{arom}}$ ), 127.8 ( $\text{C}_{\text{arom}}$ ), 128.4 ( $4\text{C}_{\text{arom}}$ ), 128.7 ( $2\text{C}_{\text{arom}}$ ), 129.2 ( $2\text{C}_{\text{arom}}$ ), 133.5 ( $\text{C}_{3'}$ ), 135.5 ( $\text{C}_9$ ), 136.8 ( $\text{C}_{12}$ ), 139.2 ( $\text{C}_7$ ), 140.7 ( $\text{C}_{4'}$ ), 152.0 ( $\text{C}_{8a}$ ), 160.0 ( $\text{C}_2$ ), 166.2 ( $\text{C}_4$ ). ES-HRMS  $[\text{M}+\text{H}]^+$  calcd. ( $\text{C}_{27}\text{H}_{26}\text{N}_3\text{O}$ ) $^+$ : 408.2031, found: 408.2092.

**6c: 4-((1-benzyl-2,5-dihydro-1H-pyrrol-3-yl)methoxy)-2-(p-tolyl)benzopyrimidine**

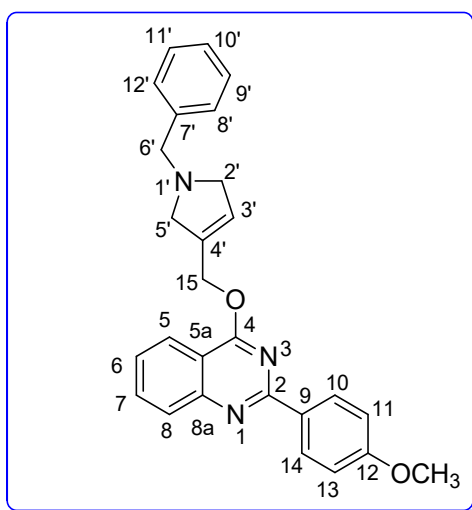

Yellow oil; yield: 63%;  $R_f$  (cyclohexane/ EtOAc: 9/1) = 0.5.  $^1\text{H}$  NMR (300 MHz,  $\text{CDCl}_3$ ):  $\delta$  (ppm) = 3.47-3.50 (m, 2H,  $\text{H}_{5'}$ ), 3.57-3.60 (m, 2H,  $\text{H}_{2'}$ ), 3.74 (s, 2H,  $\text{H}_{6'}$ ), 3.78 (s, 3H,  $\text{OCH}_3$ ), 5.16 (s, 2H,  $\text{H}_{15}$ ), 5.82-5.84 (m, 1H,  $\text{H}_{3'}$ ), 6.89 (d, 2H,  $\text{H}_{\text{arom}}$ ,  $J = 7.4$  Hz), 7.12-7.28 (m, 5H,  $\text{H}_{\text{arom}}$ ), 7.33-7.35 (m, 1H,  $\text{H}_6$ ), 7.65-7.70 (m, 1H,  $\text{H}_7$ ), 7.83 (d, 1H,  $\text{H}_5$ ,  $J = 8.4$  Hz), 8.00-8.03 (m, 1H,  $\text{H}_8$ ), 8.38-8.43 (m, 2H,  $\text{H}_{\text{arom}}$ ).  $^{13}\text{C}$  NMR (75 MHz,  $\text{CDCl}_3$ ):  $\delta$  (ppm) = 55.4 ( $\text{OCH}_3$ ), 59.8- ( $\text{C}_{5'}$ ), 60.2 ( $\text{C}_{2'}$ ), 60.4 ( $\text{C}_{6'}$ ), 63.5 ( $\text{C}_{15}$ ), 113.7 ( $2\text{C}_{\text{arom}}$ ), 114.9 ( $\text{C}_{5a}$ ), 123.5 ( $\text{C}_{\text{arom}}$ ), 125.6 ( $\text{C}_{\text{arom}}$ ), 126.0 ( $\text{C}_{\text{arom}}$ ), 127.1 ( $\text{C}_{\text{arom}}$ ), 127.7 ( $\text{C}_{\text{arom}}$ ), 128.4 ( $2\text{C}_{\text{arom}}$ ), 128.7 ( $2\text{C}_{\text{arom}}$ ), 130.1 ( $2\text{C}_{\text{arom}}$ ), 130.7 ( $\text{C}_9$ ), 133.5 ( $\text{C}_{3'}$ ), 136.9 ( $\text{C}_7$ ), 139.1 ( $\text{C}_{4'}$ ), 152.1 ( $\text{C}_{8a}$ ), 159.7 ( $\text{C}_2$ ), 161.7 ( $\text{C}_{12}$ ), 166.1 ( $\text{C}_4$ ). ES-HRMS  $[\text{M}+\text{H}]^+$  calcd. ( $\text{C}_{27}\text{H}_{26}\text{N}_3\text{O}_2$ ) $^+$ : 424.1980, found: 424.2041.

**6d: 4-((1-benzyl-2,5-dihydro-1H-pyrrol-3-yl)methoxy)-2(3,4dimethoxyphenyl)benzopyrimidine**

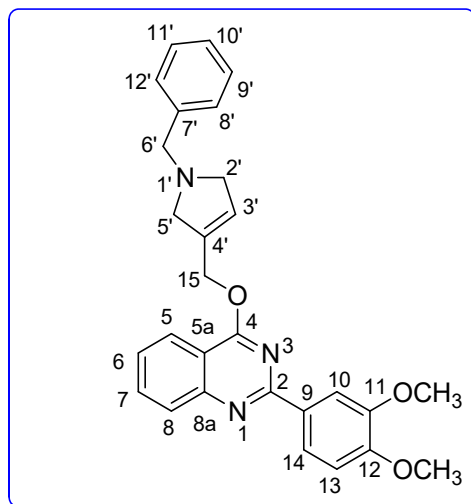

White solid; yield: 65%; mp: 102-104 °C;  $R_f$  (cyclohexane/ EtOAc: 9/1) = 0.5.  $^1\text{H}$  NMR (300 MHz,  $\text{CDCl}_3$ ):  $\delta$  (ppm) = 3.54-3.57 (m, 2H,  $\text{H}_{5'}$ ), 3.62-3.65 (m, 2H,  $\text{H}_{2'}$ ), 3.79 (s, 2H,  $\text{H}_{6'}$ ), 3.90 (s, 3H,  $\text{OCH}_3$ ), 3.97 (s, 3H,  $\text{OCH}_3$ ), 5.21 (s, 2H,  $\text{H}_{15}$ ), 5.87-5.88 (m, 1H,  $\text{H}_{3'}$ ), 6.89 (d, 1H,  $\text{H}_{\text{arom}}$ ,  $J = 8.4$  Hz), 7.20-7.32 (m, 5H,  $\text{H}_{\text{arom}}$ ), 7.38-7.43 (m, 1H,  $\text{H}_{6'}$ ), 7.70-7.75 (m, 1H,  $\text{H}_7$ ), 7.88 (d, 1H,  $\text{H}_5$ ,  $J = 8.3$  Hz), 8.05-8.12 (m, 3H,  $\text{H}_{\text{arom}}$ ).  $^{13}\text{C}$  NMR (75 MHz,  $\text{CDCl}_3$ ):  $\delta$  (ppm) = 55.9 ( $\text{OCH}_3$ ), 56.0 ( $\text{OCH}_3$ ), 59.8- ( $\text{C}_{5'}$ ), 60.2 ( $\text{C}_{2'}$ ), 60.3 ( $\text{C}_{6'}$ ), 63.4 ( $\text{C}_{15}$ ), 110.6 ( $\text{C}_{\text{arom}}$ ), 111.0 ( $\text{C}_{\text{arom}}$ ), 114.9 ( $\text{C}_{5a}$ ), 121.9 ( $\text{C}_{\text{arom}}$ ), 123.4 ( $\text{C}_{\text{arom}}$ ), 125.6 ( $\text{C}_{\text{arom}}$ ), 126.1 ( $\text{C}_{\text{arom}}$ ), 127.2 ( $\text{C}_{\text{arom}}$ ), 127.7 ( $\text{C}_{\text{arom}}$ ), 128.4 ( $2\text{C}_{\text{arom}}$ ), 128.7 ( $2\text{C}_{\text{arom}}$ ), 130.9 ( $\text{C}_9$ ), 133.5 ( $\text{C}_{3'}$ ), 136.8 ( $\text{C}_{7'}$ ), 138.8 ( $\text{C}_{4'}$ ), 148.9 ( $\text{C}_{12}$ ), 151.3 ( $\text{C}_{11}$ ), 152.0 ( $\text{C}_{8a}$ ), 159.6 ( $\text{C}_2$ ), 166.1 ( $\text{C}_4$ ). ES-HRMS  $[\text{M}+\text{H}]^+$  calcd. ( $\text{C}_{26}\text{H}_{28}\text{N}_3\text{O}$ ) $^+$ : 454.2086, found: 454.2139.

**6e: 4-((1-benzyl-2,5-dihydro-1H-pyrrol-3-yl)methoxy)-2-(4-(tert-butyl)phenyl)benzopyrimidine**

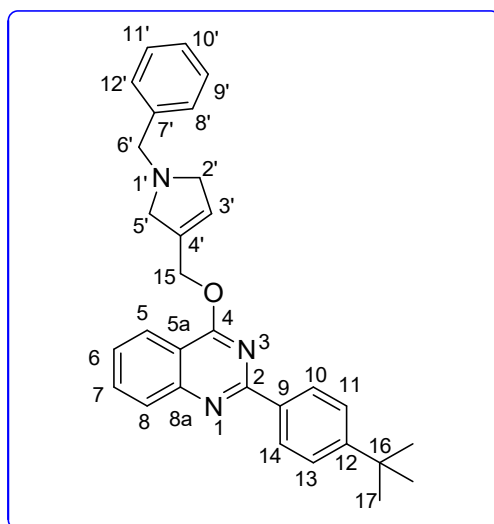

Yellow oil; yield: 59%;  $R_f$  (cyclohexane/ EtOAc: 9/1) = 0.5.  $^1\text{H}$  NMR (300 MHz,  $\text{CDCl}_3$ ):  $\delta$  (ppm) = 1.32 (s, 9H,  $\text{H}_{17}$ ), 3.55 (s, 2H,  $\text{H}_{5'}$ ), 3.64 (d, 2H,  $\text{H}_{2'}$ ,  $J = 6.1$  Hz), 3.80 (s, 2H,  $\text{H}_{6'}$ ), 5.23

(s, 2H, H<sub>15</sub>), 5.88 (t, 1H, H<sub>3'</sub>, *J* = 6.1 Hz), 7.21-7.33 (m, 5H, H<sub>arom</sub>), 7.41-7.47 (m, 3H, H<sub>arom</sub>), 7.72-7.77 (m, 1H, H<sub>7</sub>), 7.91 (d, 1H, H<sub>5</sub>, *J* = 8.4 Hz), 8.07-8.10 (m, 1H, H<sub>8</sub>), 8.38-8.42 (m, 2H, H<sub>arom</sub>). <sup>13</sup>C NMR (75 MHz, CDCl<sub>3</sub>): δ (ppm) = 31.2 (C<sub>17</sub>), 34.8 (C<sub>16</sub>), 59.8-60.2 (C<sub>5'</sub>+C<sub>2'</sub>), 60.3 (C<sub>6'</sub>), 63.5 (C<sub>15</sub>), 115.1 (C<sub>5a</sub>), 123.4 (C<sub>arom</sub>), 125.4 (2C<sub>arom</sub>), 125.6 (C<sub>arom</sub>), 126.2 (C<sub>arom</sub>), 127.1 (C<sub>arom</sub>), 127.9 (C<sub>arom</sub>), 128.2 (2C<sub>arom</sub>), 128.4 (2C<sub>arom</sub>), 128.7 (2C<sub>arom</sub>), 133.5 (C<sub>3'</sub>), 135.4 (C<sub>9</sub>), 136.9 (C<sub>7'</sub>), 138.8 (C<sub>4'</sub>), 152.1 (C<sub>8a</sub>), 153.8 (C<sub>12</sub>), 160.0 (C<sub>2</sub>), 166.2 (C<sub>4</sub>). ES-HRMS [M+H]<sup>+</sup> calcd. (C<sub>30</sub>H<sub>32</sub>N<sub>3</sub>O)<sup>+</sup>: 450.2501, found: 450.2552.

**6f: 4-((1-benzyl-2,5-dihydro-1H-pyrrol-3-yl)methoxy)-2-(4-chlorophenyl)benzopyrimidine**

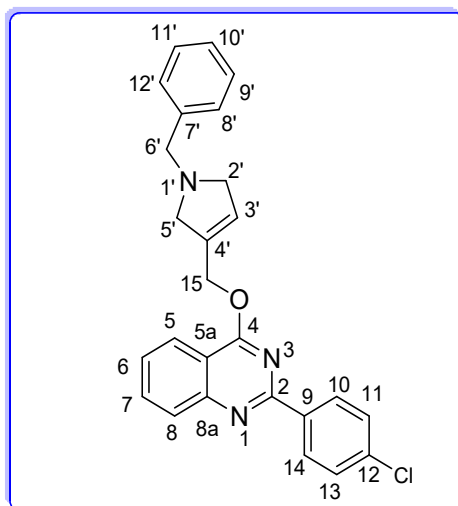

White solid; yield: 65%; mp: 123-125 °C; R<sub>f</sub> (cyclohexane/ EtOAc: 9/1) = 0.5. <sup>1</sup>H NMR (300 MHz, CDCl<sub>3</sub>): δ (ppm) = 3.52-3.55 (m, 2H, H<sub>5'</sub>), 3.60-3.63 (m, 2H, H<sub>2'</sub>), 3.78 (s, 2H, H<sub>6'</sub>), 5.20 (s, 2H, H<sub>15</sub>), 5.87-5.88 (m, 1H, H<sub>3'</sub>), 7.19-7.31 (m, 5H, H<sub>arom</sub>), 7.37-7.47 (m, 3H, H<sub>arom</sub>), 7.72-7.78 (m, 1H, H<sub>7</sub>), 7.89 (d, 1H, H<sub>5</sub>, *J* = 8.4 Hz), 8.08 (d, 1H, H<sub>8</sub>, *J* = 8.1 Hz), 8.41-8.45 (m, 2H, H<sub>arom</sub>). <sup>13</sup>C NMR (75 MHz, CDCl<sub>3</sub>): δ (ppm) = 59.8 (C<sub>5'</sub>), 60.2 (C<sub>2'</sub>), 60.4 (C<sub>6'</sub>), 63.7 (C<sub>15</sub>), 115.2 (C<sub>5a</sub>), 123.5 (C<sub>arom</sub>), 125.8 (C<sub>arom</sub>), 126.7 (C<sub>arom</sub>), 127.1 (C<sub>arom</sub>), 127.9 (C<sub>arom</sub>), 128.4 (2C<sub>arom</sub>), 128.6 (2C<sub>arom</sub>), 128.7 (2C<sub>arom</sub>), 129.7 (2C<sub>arom</sub>), 133.7 (C<sub>3'</sub>), 136.5 (C<sub>9</sub>), 136.6 (C<sub>12</sub>), 136.7 (C<sub>7'</sub>), 139.1 (C<sub>4'</sub>), 151.8 (C<sub>8a</sub>), 158.8 (C<sub>2</sub>), 166.3 (C<sub>4</sub>). ES-HRMS [M+H]<sup>+</sup> calcd. (C<sub>26</sub>H<sub>23</sub>ClN<sub>3</sub>O)<sup>+</sup>: 428.1484, found: 428.1534.

**6g: 4-((1-benzyl-2,5-dihydro-1H-pyrrol-3-yl)methoxy)-2-(4-fluorophenyl)benzopyrimidine**

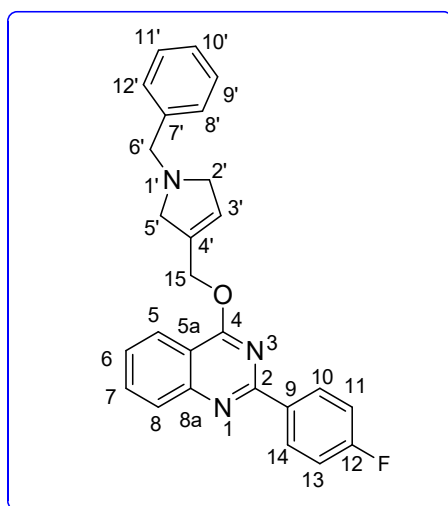

White solid; yield: 81%; mp: 96-98 °C;  $R_f$  (cyclohexane/ EtOAc: 9/1) = 0.5.  $^1\text{H}$  NMR (300 MHz,  $\text{CDCl}_3$ ):  $\delta$  (ppm) = 3.53-3.55 (m, 2H,  $\text{H}_{5'}$ ), 3.60-3.63 (m, 2H,  $\text{H}_{2'}$ ), 3.79 (s, 2H,  $\text{H}_{6'}$ ), 5.21 (s, 2H,  $\text{H}_{15}$ ), 5.87-5.88 (m, 1H,  $\text{H}_{3'}$ ), 7.09 (t, 2H,  $\text{H}_{\text{arom}}$ ,  $J = 8.7$  Hz), 7.18-7.31 (m, 5H,  $\text{H}_{\text{arom}}$ ), 7.41-7.44 (m, 1H,  $\text{H}_6$ ), 7.72-7.77 (m, 1H,  $\text{H}_7$ ), 7.88 (d, 1H,  $\text{H}_5$ ,  $J = 8.3$  Hz), 8.07-8.10 (m, 1H,  $\text{H}_8$ ), 8.46-8.51 (m, 2H,  $\text{H}_{\text{arom}}$ ).  $^{13}\text{C}$  NMR (75 MHz,  $\text{CDCl}_3$ ):  $\delta$  (ppm) = 59.8 ( $\text{C}_{5'}$  or  $\text{C}_{2'}$ ), 60.2 ( $\text{C}_{5'}$  or  $\text{C}_{2'}$ ), 60.4 ( $\text{C}_{6'}$ ), 63.7 ( $\text{C}_{15}$ ), 115.0 ( $\text{C}_{\text{arom}}$ ), 115.3 (d,  $J = 21.6$  Hz,  $\text{C}_{11} + \text{C}_{13}$ ), 123.5 ( $\text{C}_{\text{arom}}$ ), 125.8 ( $\text{C}_{\text{arom}}$ ), 126.5 ( $\text{C}_{\text{arom}}$ ), 127.1 ( $\text{C}_{\text{arom}}$ ), 127.8 ( $\text{C}_{\text{arom}}$ ), 128.4 ( $2\text{C}_{\text{arom}}$ ), 128.7 ( $2\text{C}_{\text{arom}}$ ), 130.5 (d,  $J = 8.6$  Hz,  $\text{C}_{10} + \text{C}_{14}$ ), 133.7 ( $\text{C}_{\text{arom}}$ ), 134.2 (d,  $J = 3$  Hz,  $\text{C}_9$ ), 136.8 ( $\text{C}_{4'}$ ), 139.0 ( $\text{C}_{\text{arom}}$ ), 151.9 ( $\text{C}_{8a}$ ), 158.9 ( $\text{C}_2$ ), 164.6 (d,  $J = 250.2$  Hz,  $\text{C}_{12}$ ), 166.3 ( $\text{C}_4$ ). ES-HRMS  $[\text{M}+\text{H}]^+$  calcd. ( $\text{C}_{26}\text{H}_{23}\text{FN}_3\text{O}$ ) $^+$ : 412.1780, found: 412.1833.

**6h: 4-((1-benzyl-2,5-dihydro-1H-pyrrol-3-yl)methoxy)-2-(3-bromophenyl)benzopyrimidine**

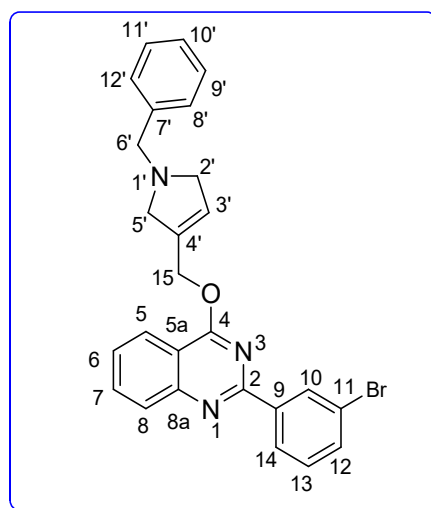

White solid; yield: 70%; mp: 99-101 °C;  $R_f$  (cyclohexane/ EtOAc: 9/1) = 0.5.  $^1\text{H}$  NMR (300 MHz,  $\text{CDCl}_3$ ):  $\delta$  (ppm) = 3.54-3.56 (m, 2H,  $\text{H}_{5'}$ ), 3.61-3.64 (m, 2H,  $\text{H}_{2'}$ ), 3.80 (s, 2H,  $\text{H}_{6'}$ ), 5.22 (s, 2H,  $\text{H}_{15}$ ), 5.88-5.89 (m, 1H,  $\text{H}_{3'}$ ), 7.21-7.33 (m, 6H,  $\text{H}_{\text{arom}}$ ), 7.44-7.50 (m, 1H,  $\text{H}_6$ ), 7.53-7.56 (m, 1H,  $\text{H}_7$ ), 7.74-7.80 (m, 1H,  $\text{H}_{\text{arom}}$ ), 7.92 (d, 1H,  $\text{H}_5$ ,  $J = 8.3$  Hz), 8.09-8.12 (m, 1H,  $\text{H}_8$ ), 8.41-8.45 (m, 1H,  $\text{H}_{\text{arom}}$ ), 8.64 (t, 1H,  $\text{H}_{10}$ ,  $J = 1.7$  Hz).  $^{13}\text{C}$  NMR (75 MHz,  $\text{CDCl}_3$ ):  $\delta$  (ppm) = 59.8 ( $\text{C}_{5'}$ ), 60.1 ( $\text{C}_{2'}$ ), 60.4 ( $\text{C}_{6'}$ ), 63.8 ( $\text{C}_{15}$ ), 115.3 ( $\text{C}_{5a}$ ), 122.7 ( $\text{C}_{11}$ ), 123.5 ( $\text{C}_{\text{arom}}$ ), 125.8 ( $\text{C}_{\text{arom}}$ ), 126.8 ( $\text{C}_{\text{arom}}$ ), 126.9 ( $\text{C}_{\text{arom}}$ ), 127.1 ( $\text{C}_{\text{arom}}$ ), 128.0 ( $\text{C}_{\text{arom}}$ ), 128.4 ( $2\text{C}_{\text{arom}}$ ), 128.7 ( $2\text{C}_{\text{arom}}$ ), 129.9

(C<sub>arom</sub>), 131.4 (C<sub>arom</sub>), 133.3 (C<sub>arom</sub>), 133.7 (C<sub>3'</sub>), 136.7 (C<sub>9</sub>), 139.1 (C<sub>7'</sub>), 140.1 (C<sub>4'</sub>), 151.8 (C<sub>8a</sub>), 158.4 (C<sub>2</sub>), 166.4 (C<sub>4</sub>). ES-HRMS [M+H]<sup>+</sup> calcd. (C<sub>26</sub>H<sub>23</sub>BrN<sub>3</sub>O)<sup>+</sup>: 472.0971, found: 472.1021.

### V. Copies of NMR spectra

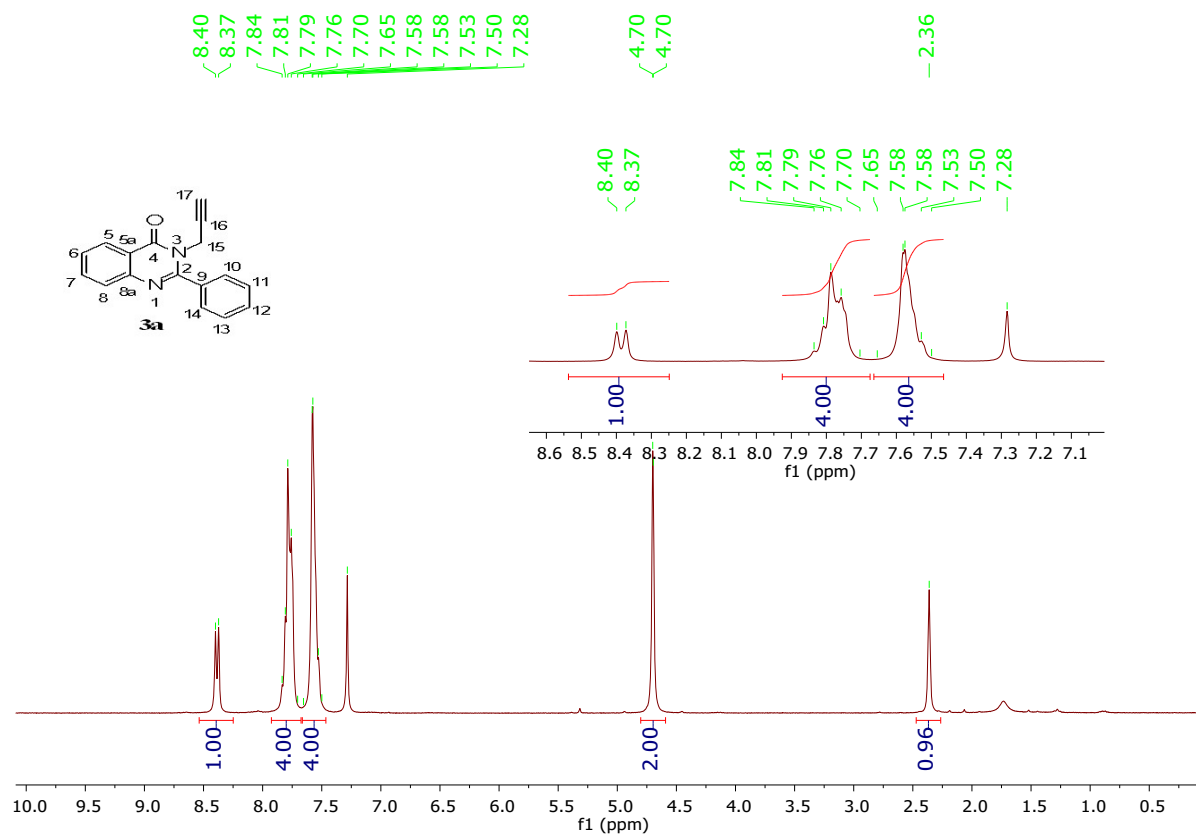

<sup>1</sup>H NMR spectrum of compound 3a

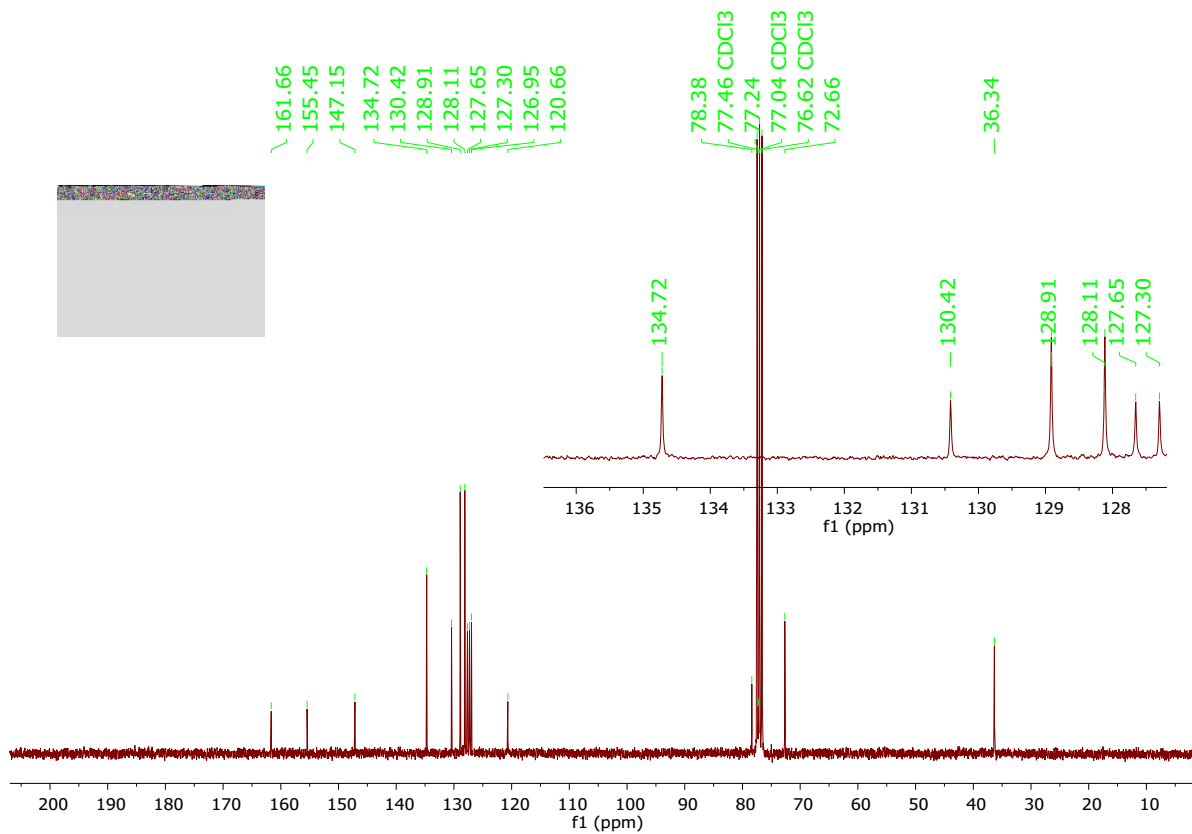

**<sup>13</sup>C NMR spectrum of compound 3a**

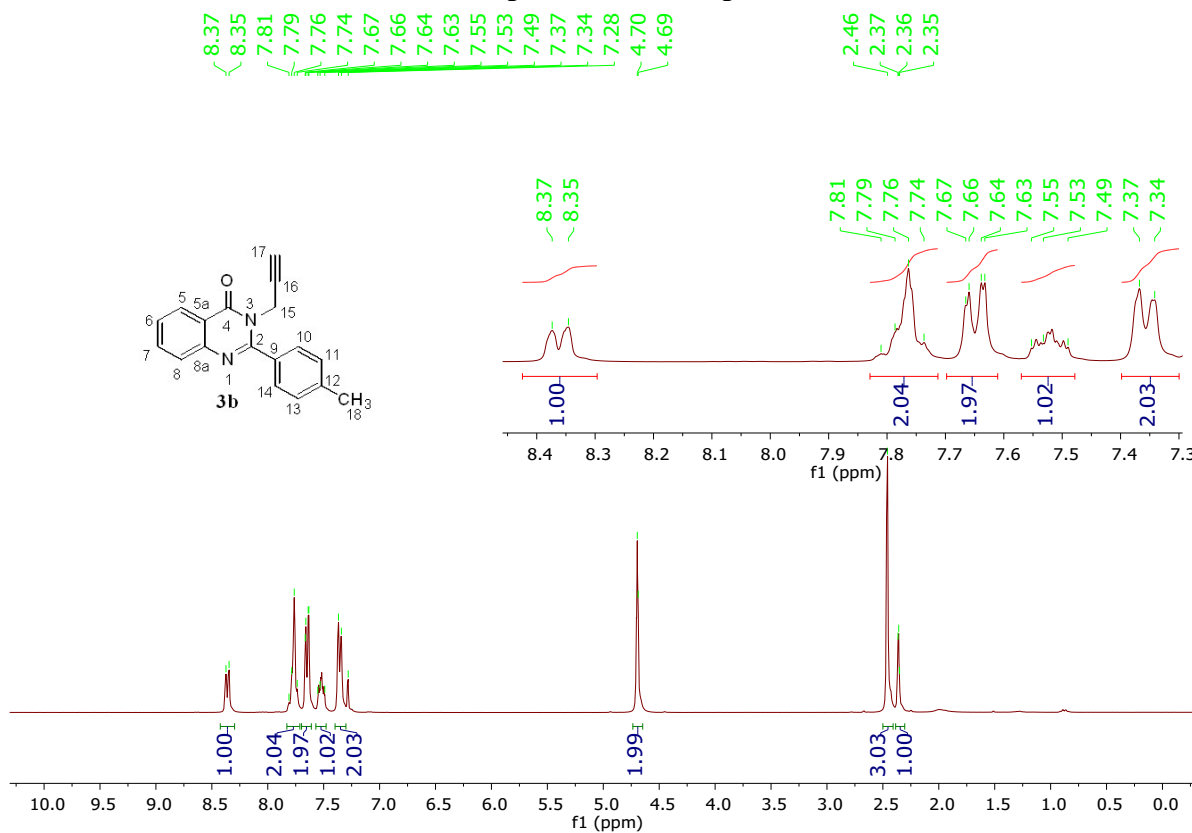

**<sup>1</sup>H NMR spectrum of compound 3b**



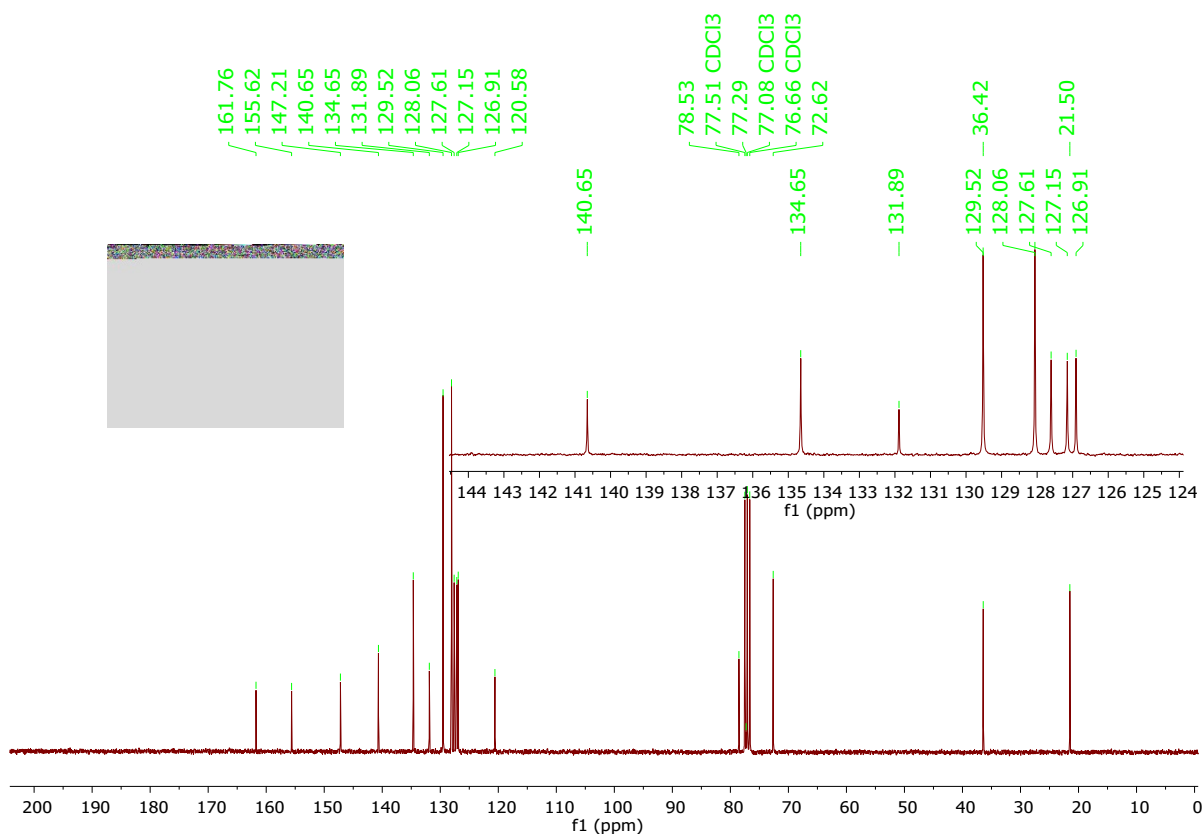

**<sup>13</sup>C NMR spectrum of compound 3b**

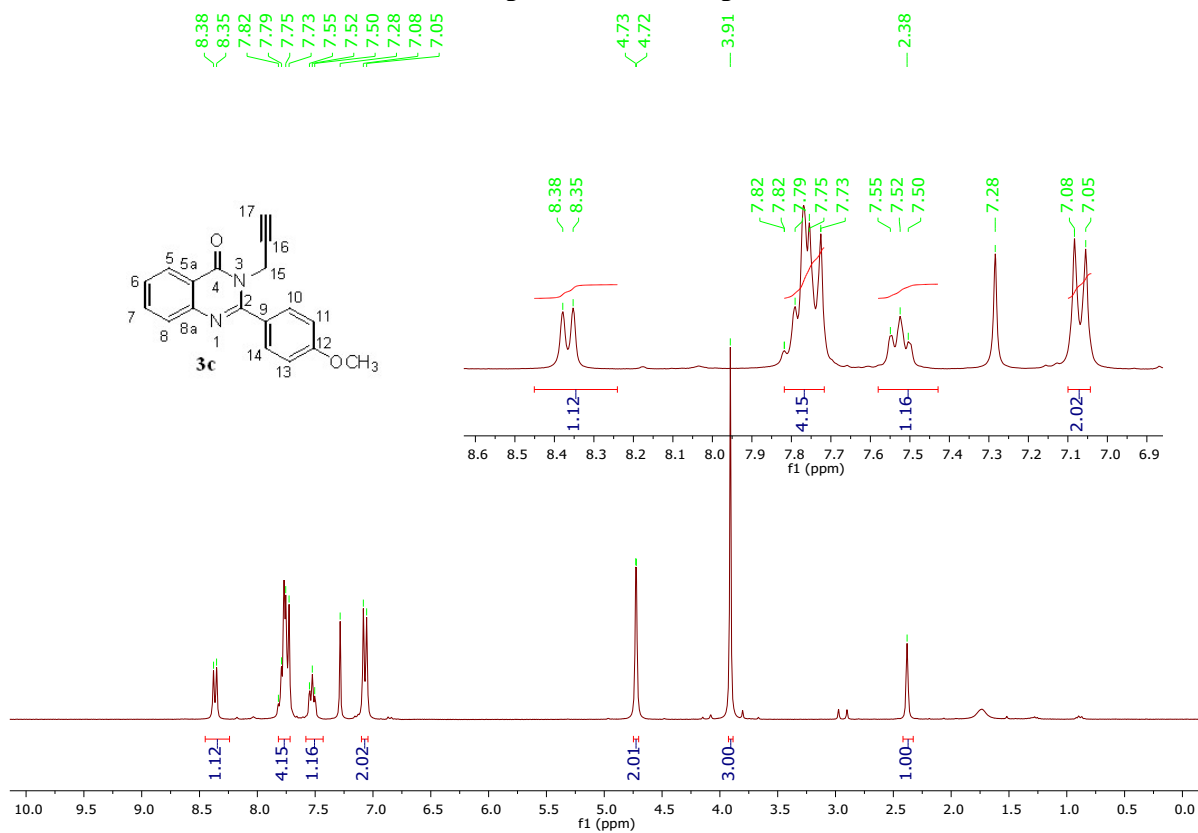

**<sup>1</sup>H NMR spectrum of compound 3c**

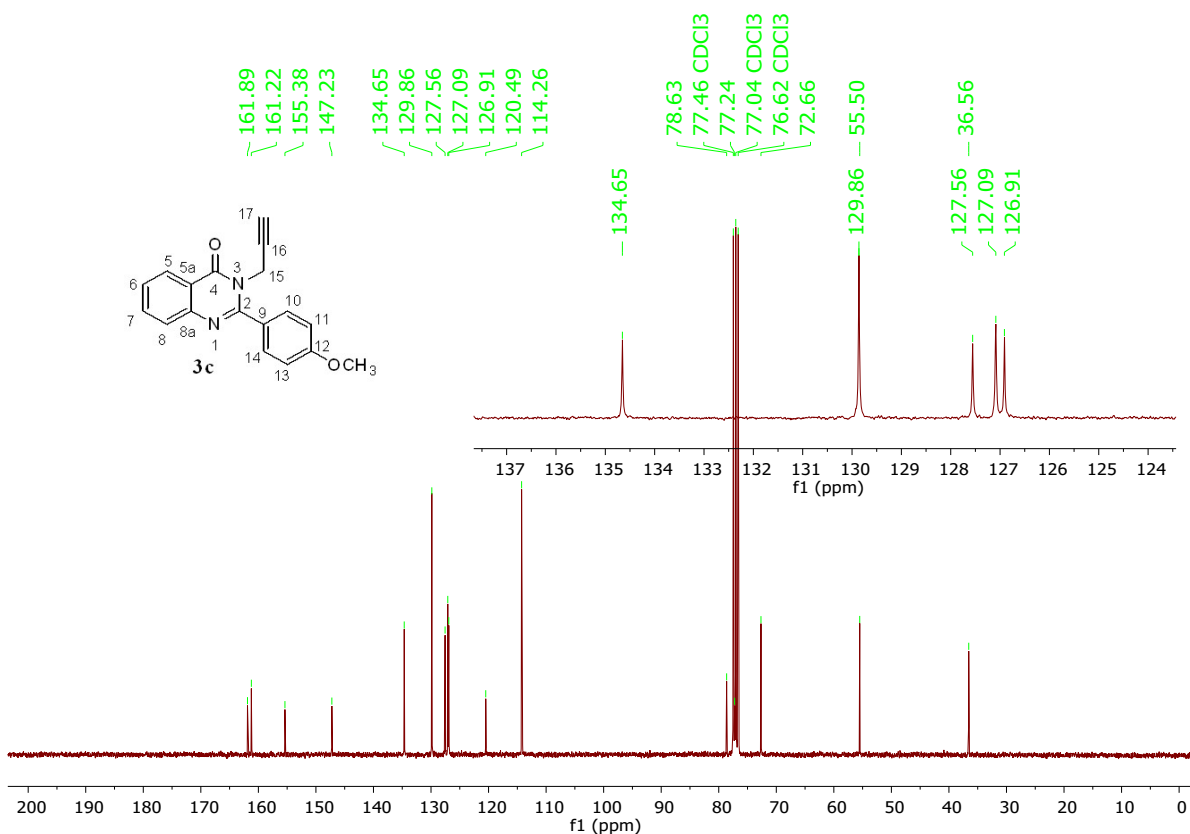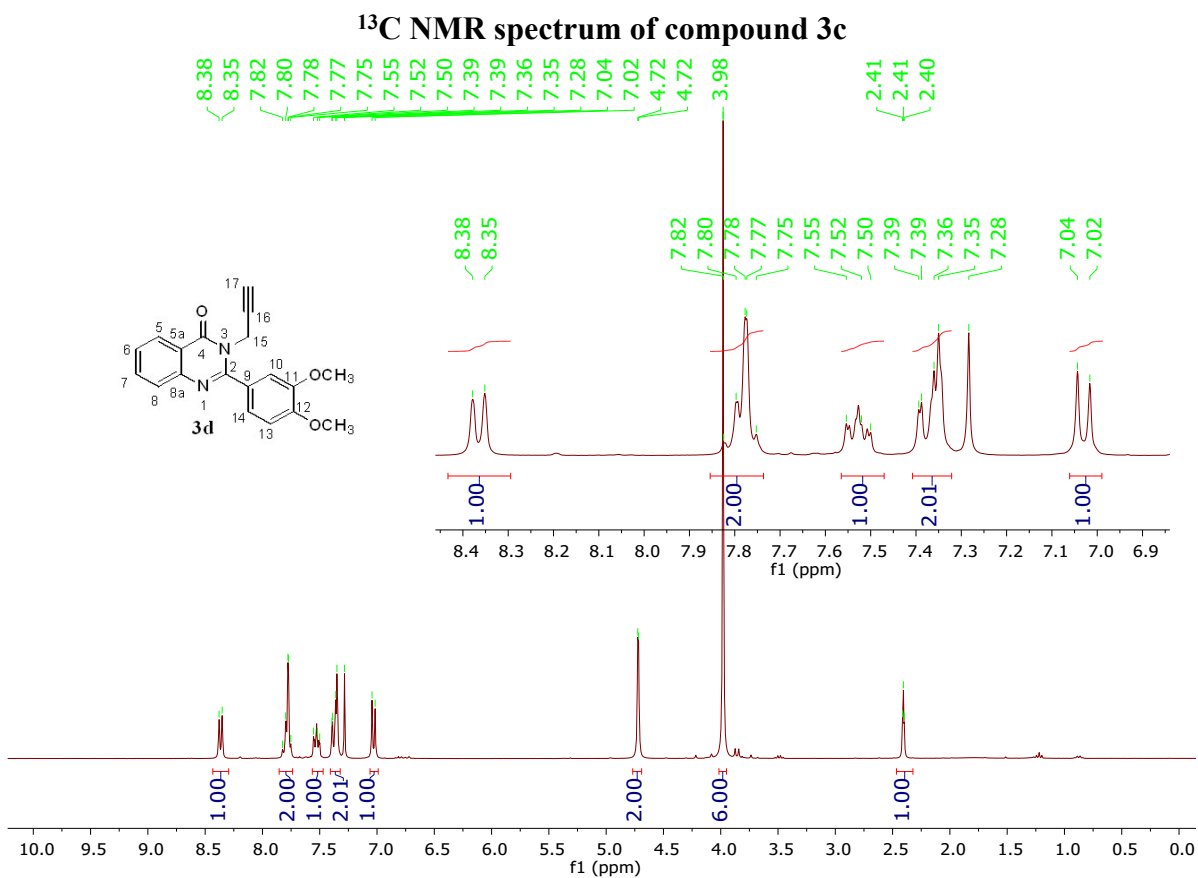

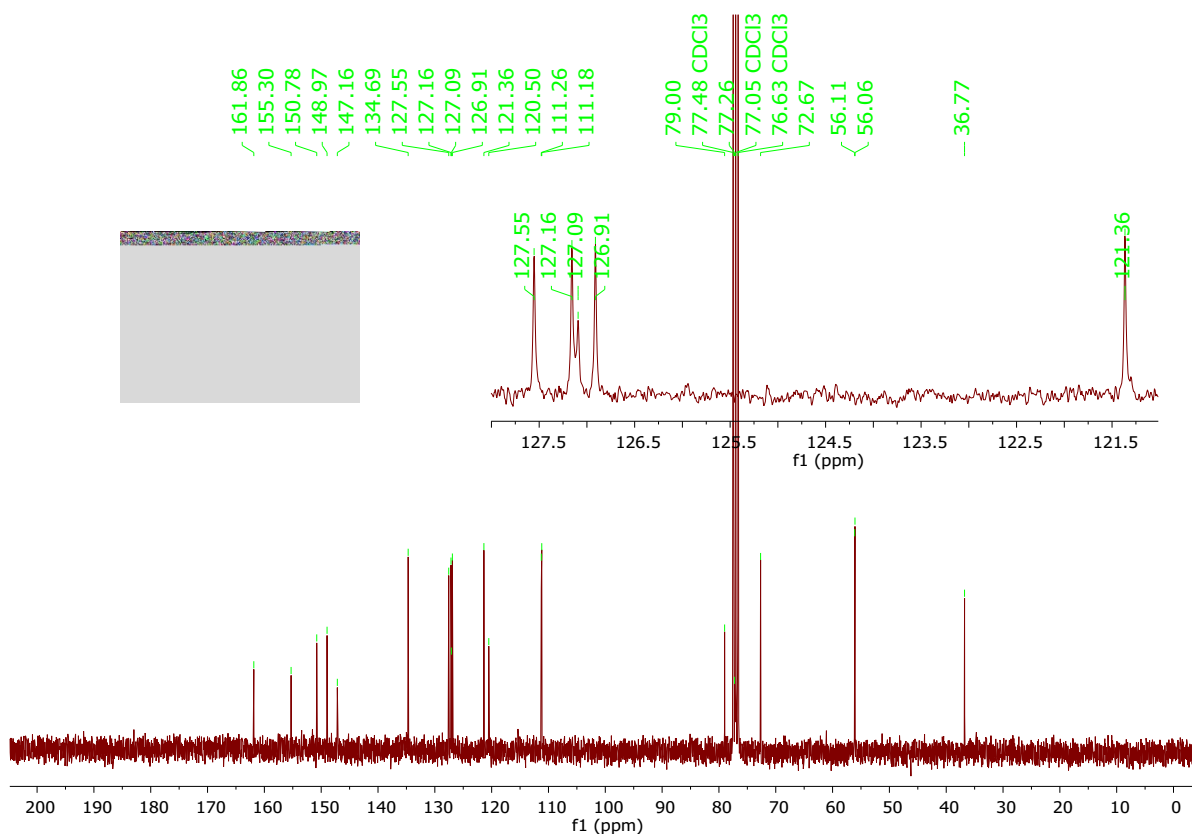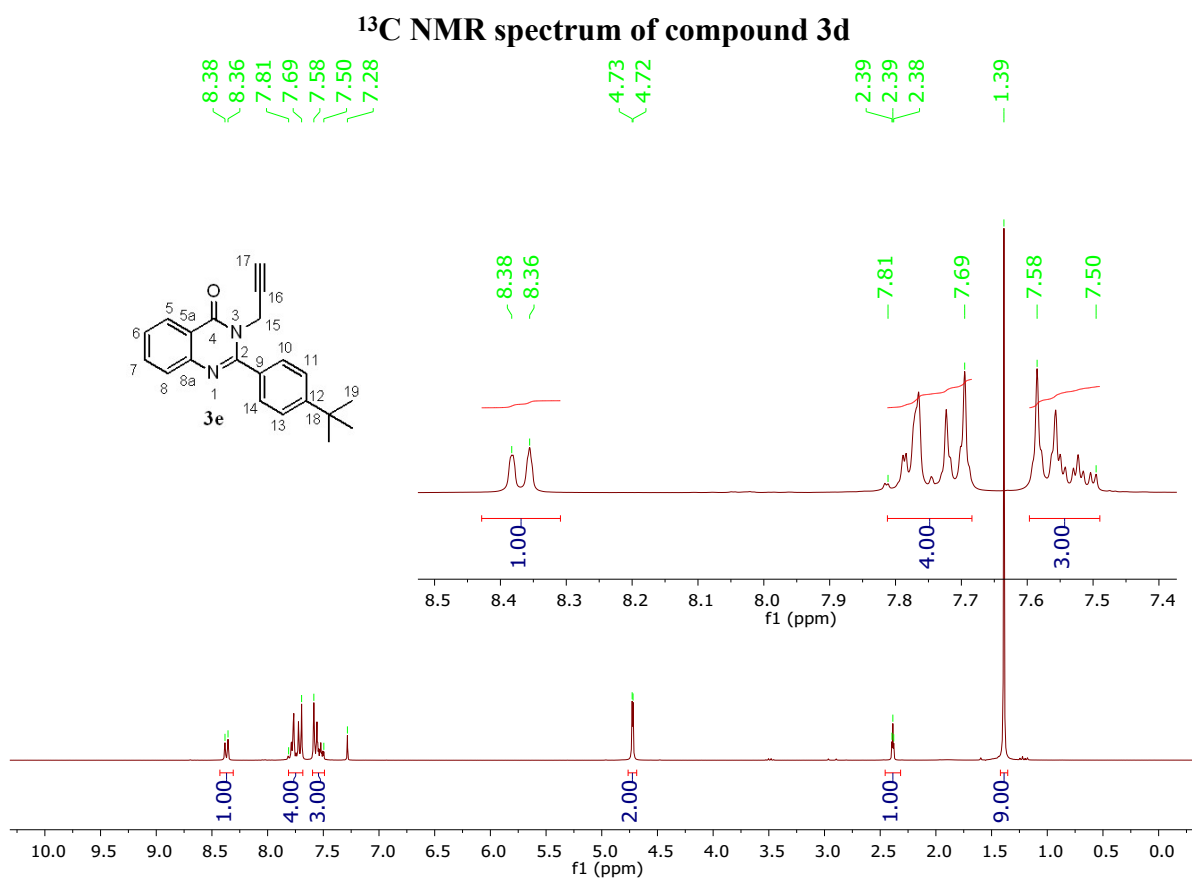

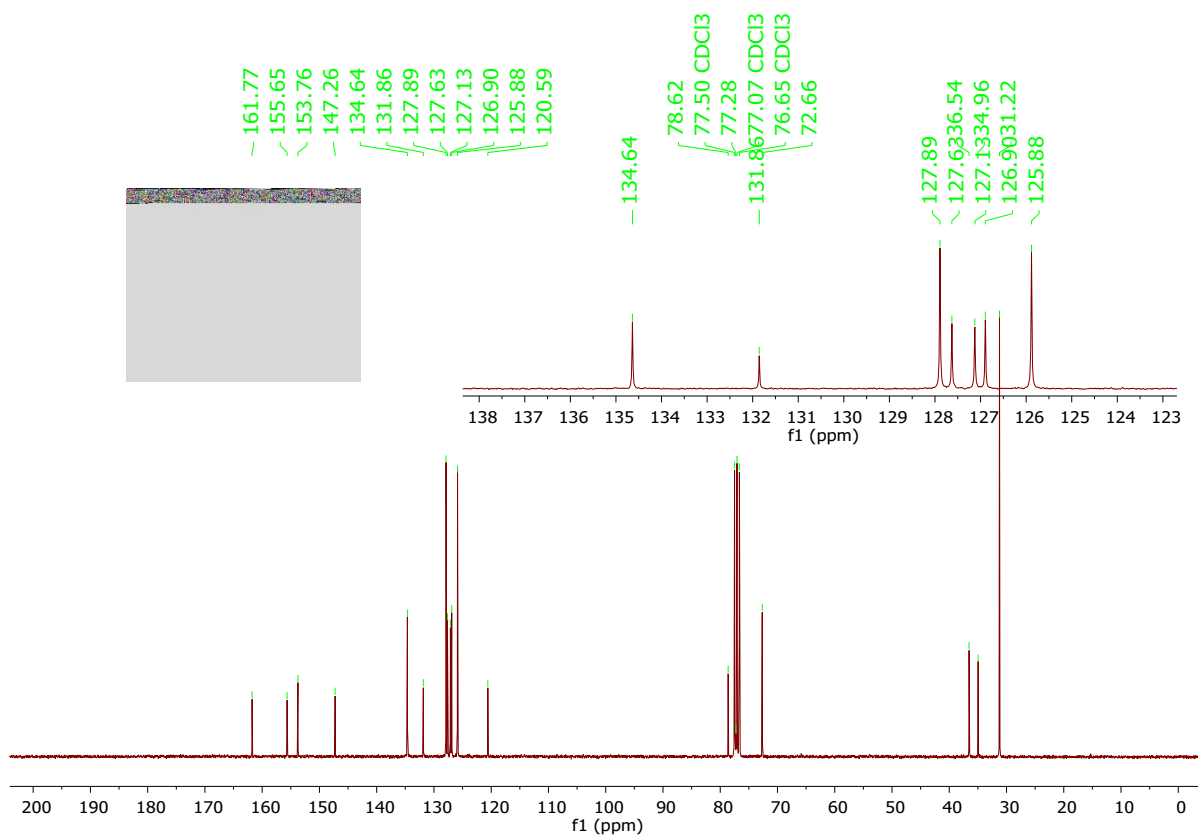

<sup>13</sup>C NMR spectrum of compound 3e

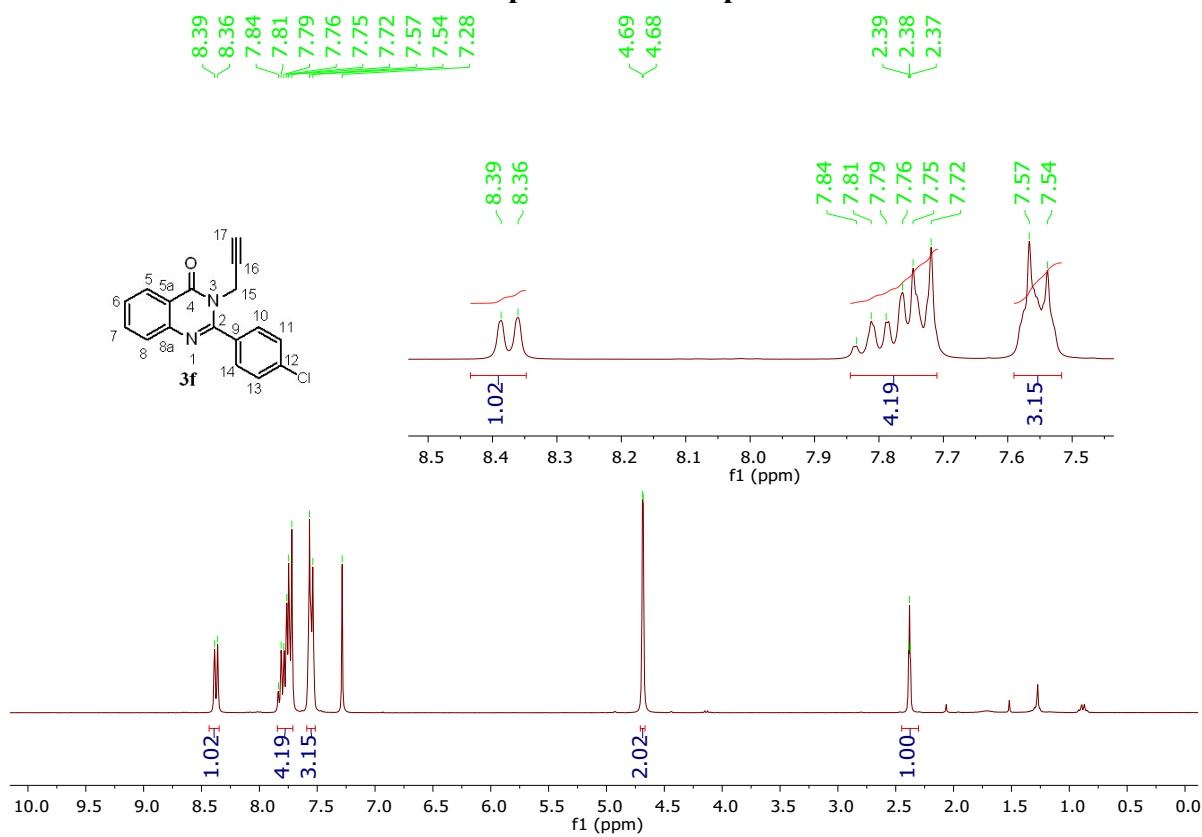

<sup>1</sup>H NMR spectrum of compound 3f

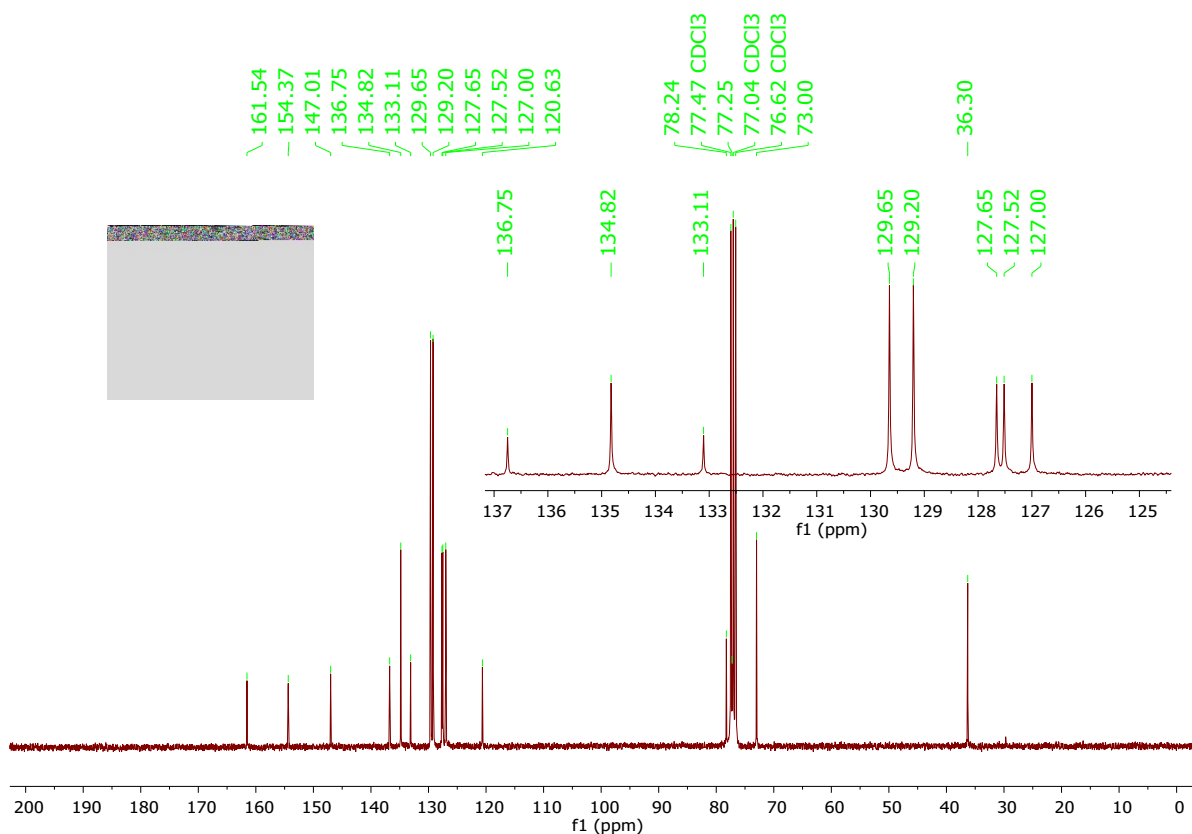

**13C NMR spectrum of compound 3f**

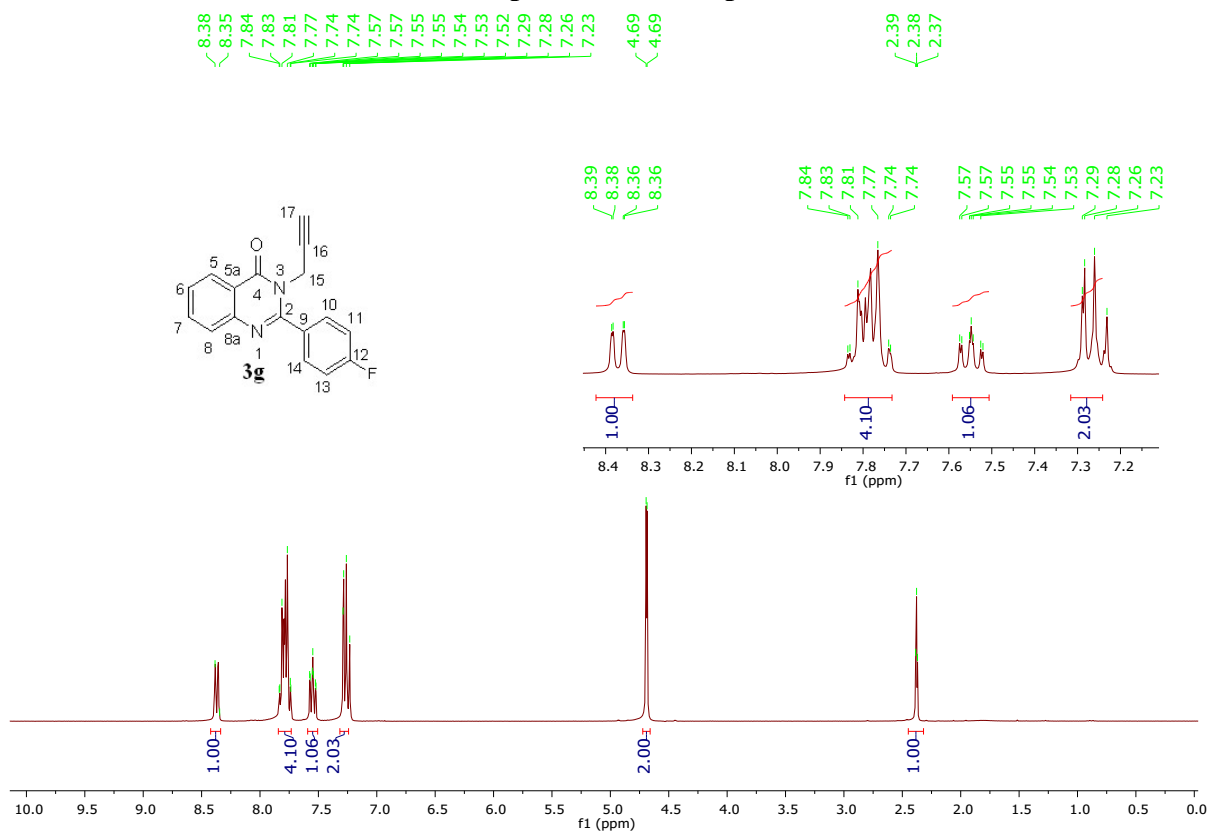

**1H NMR spectrum of compound 3g**

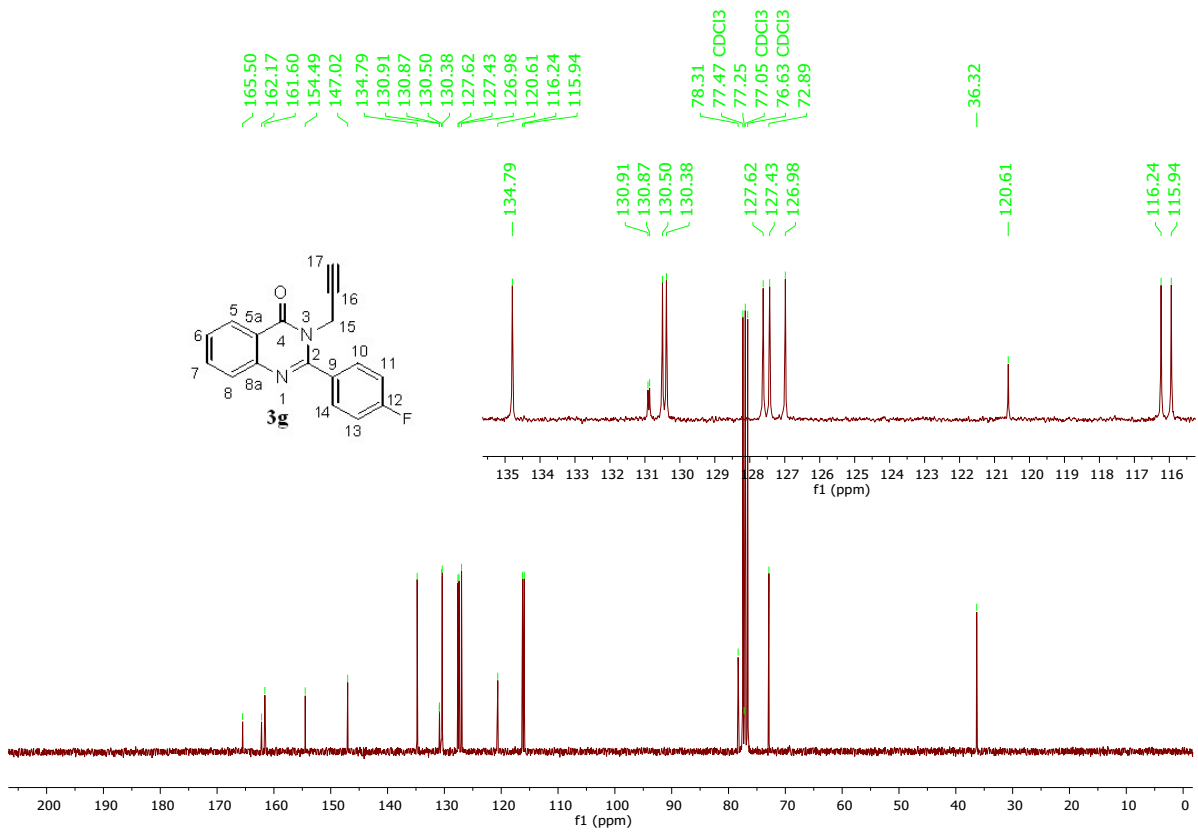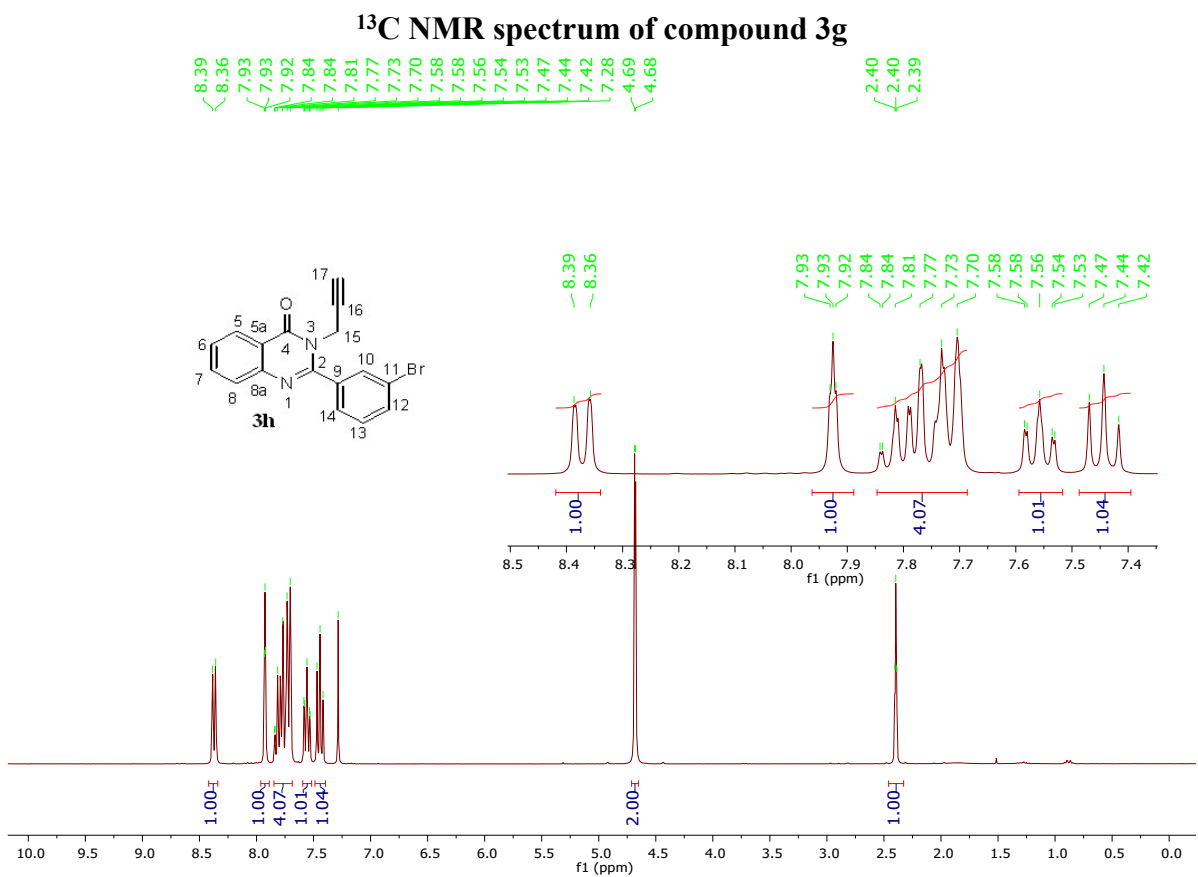

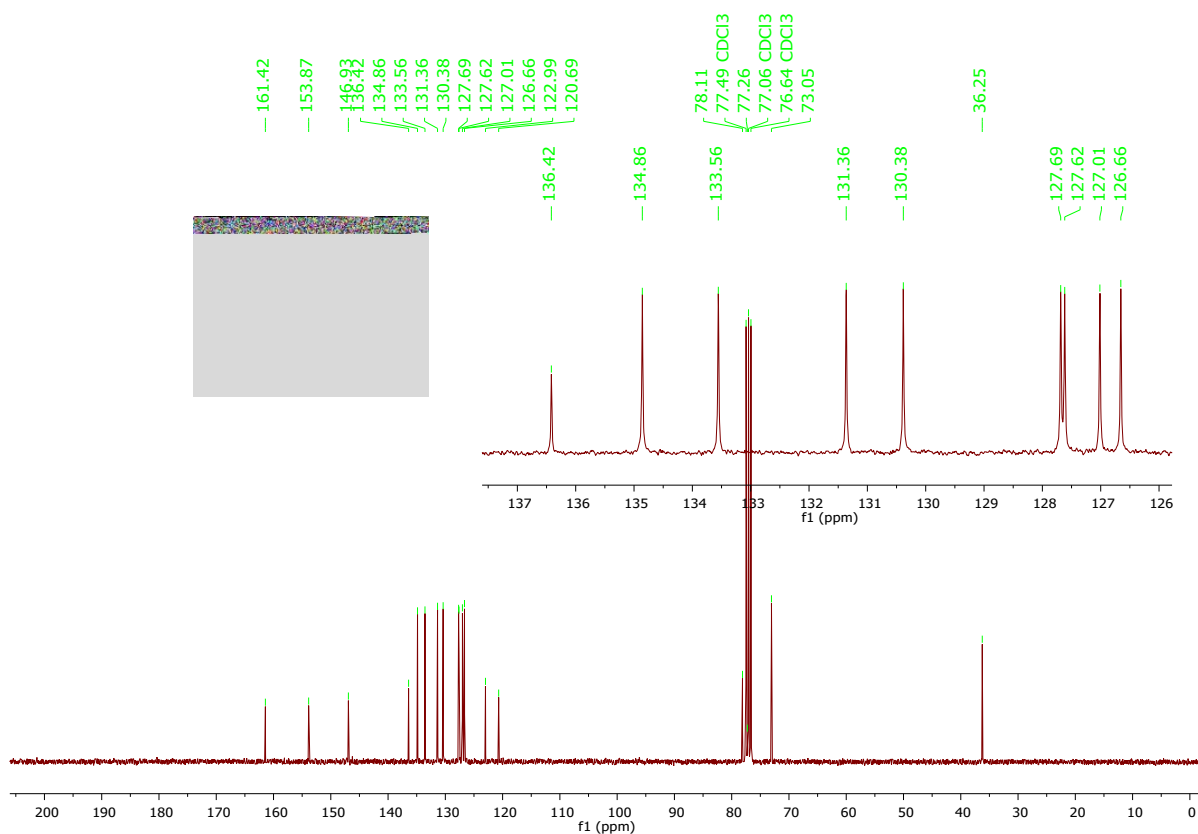

**<sup>13</sup>C NMR spectrum of compound 3h**

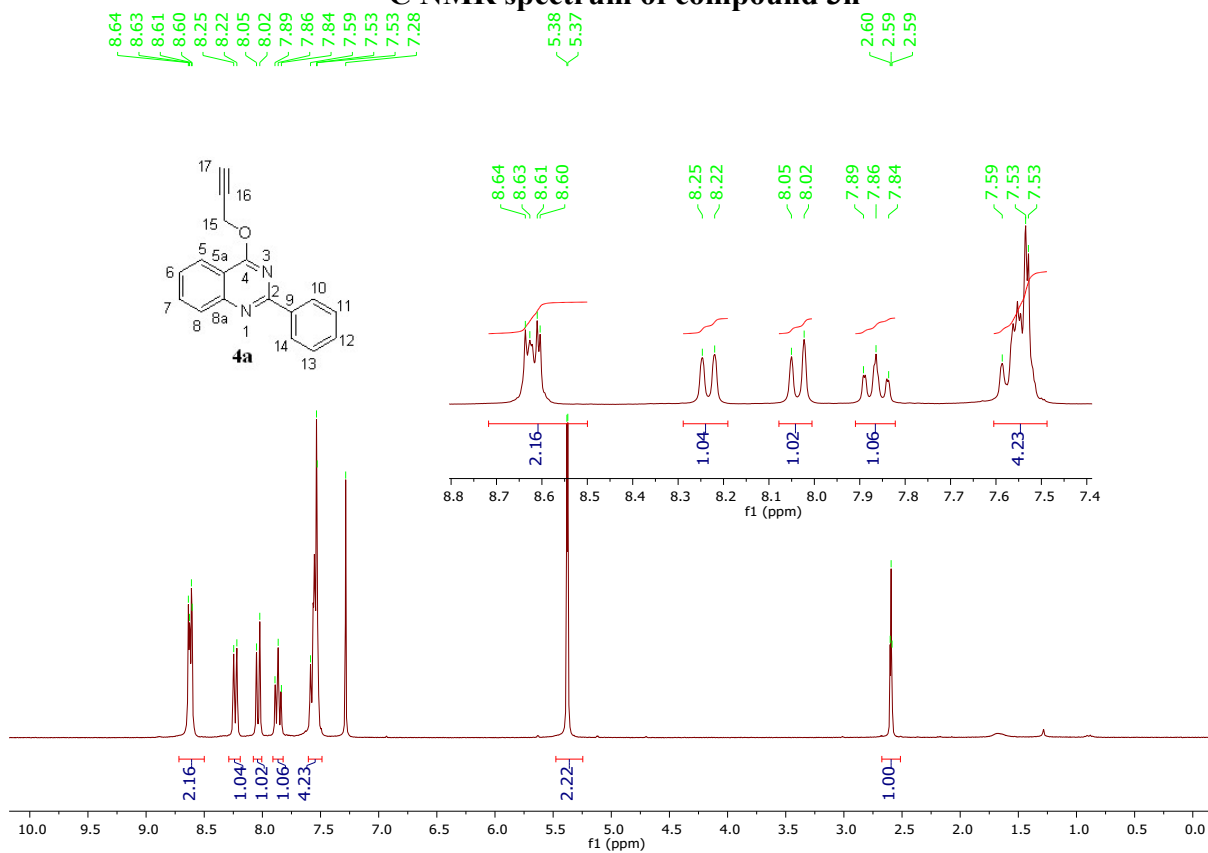

**<sup>1</sup>H NMR spectrum of compound 4a**

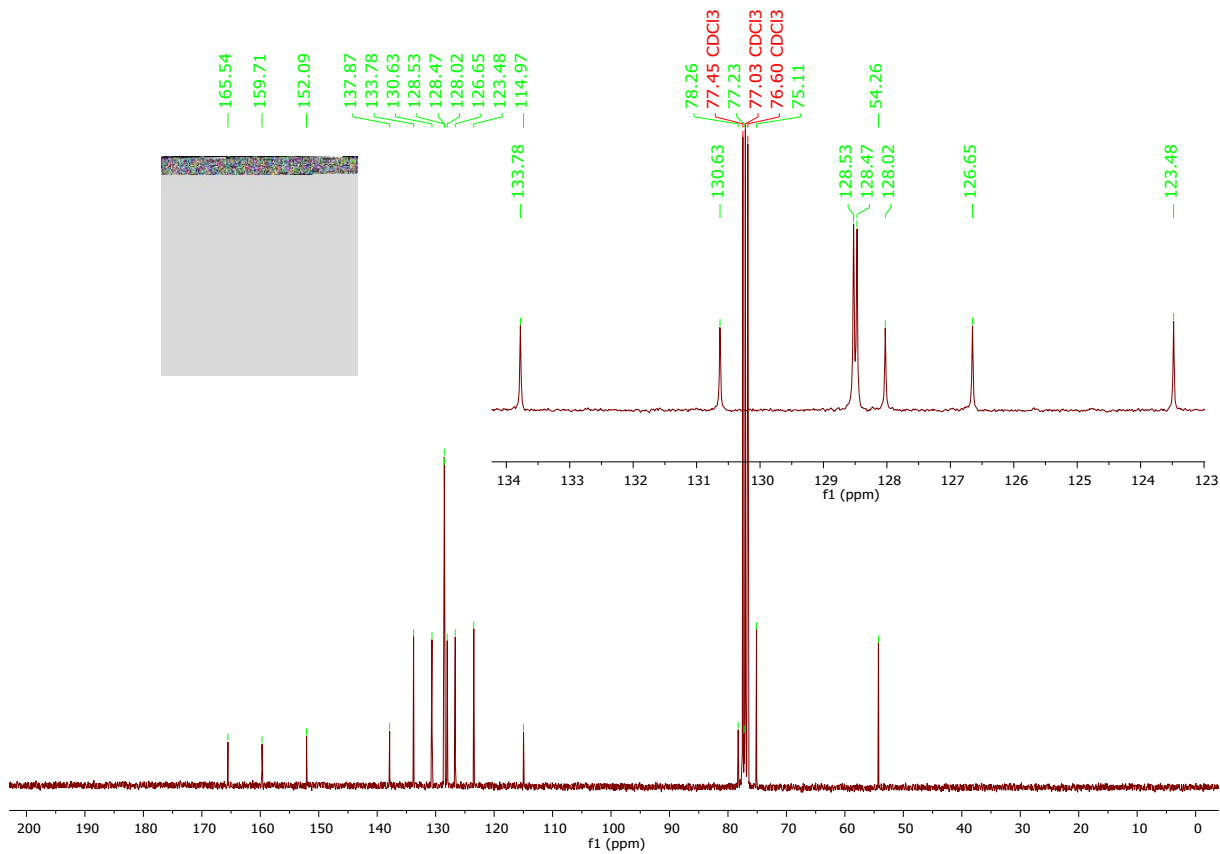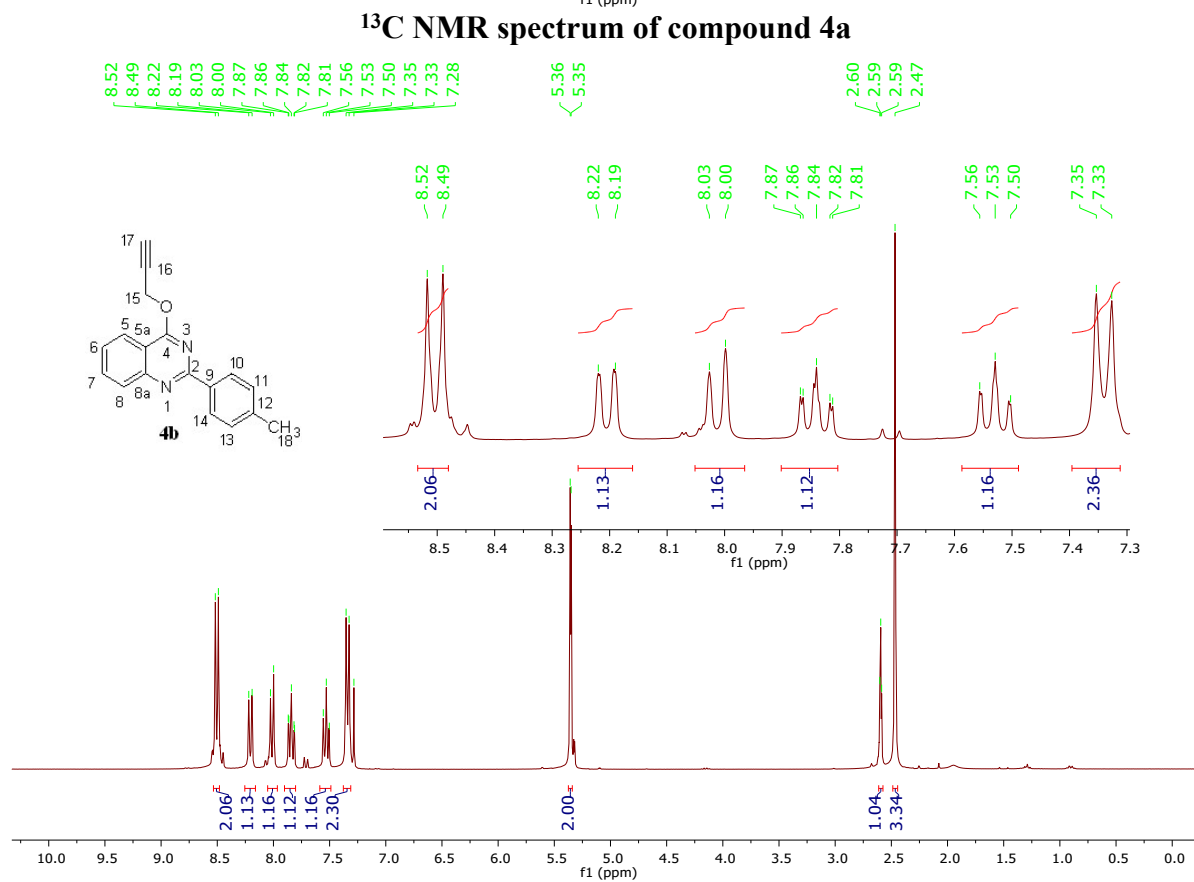



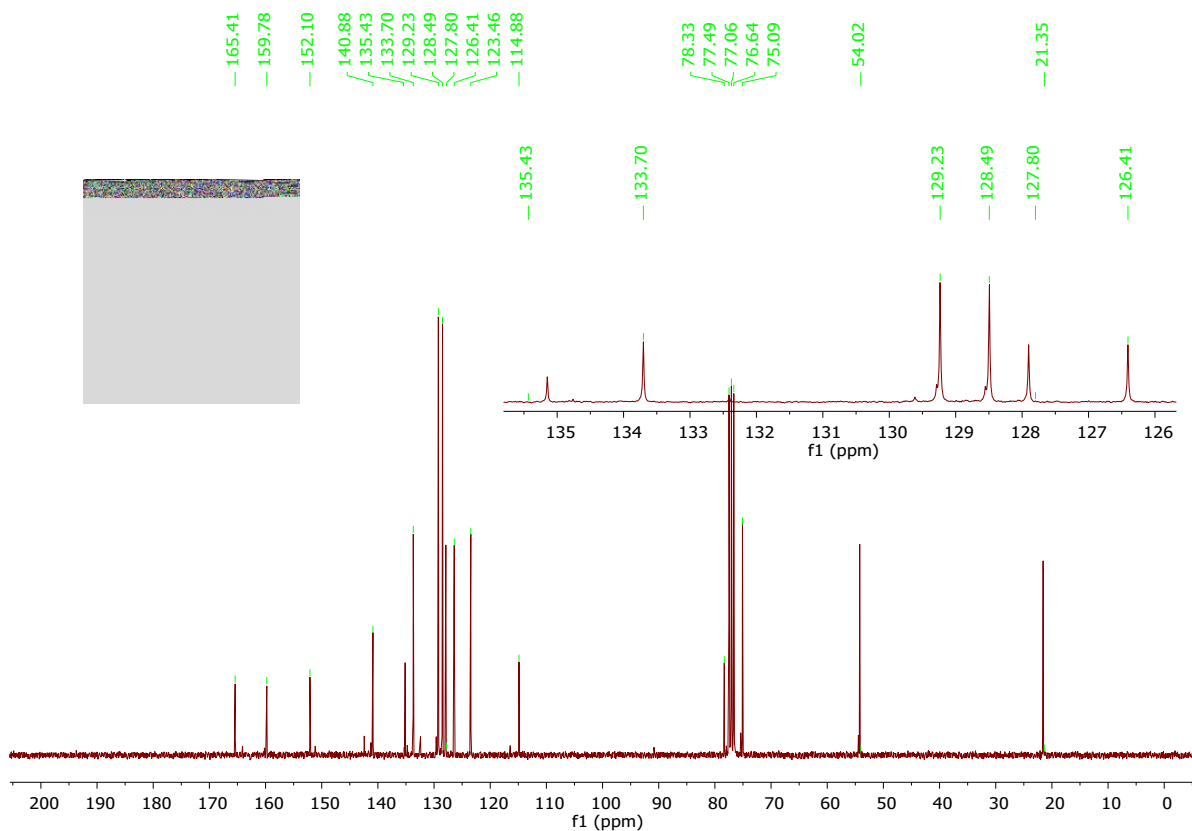

**<sup>13</sup>C NMR spectrum of compound 4b**

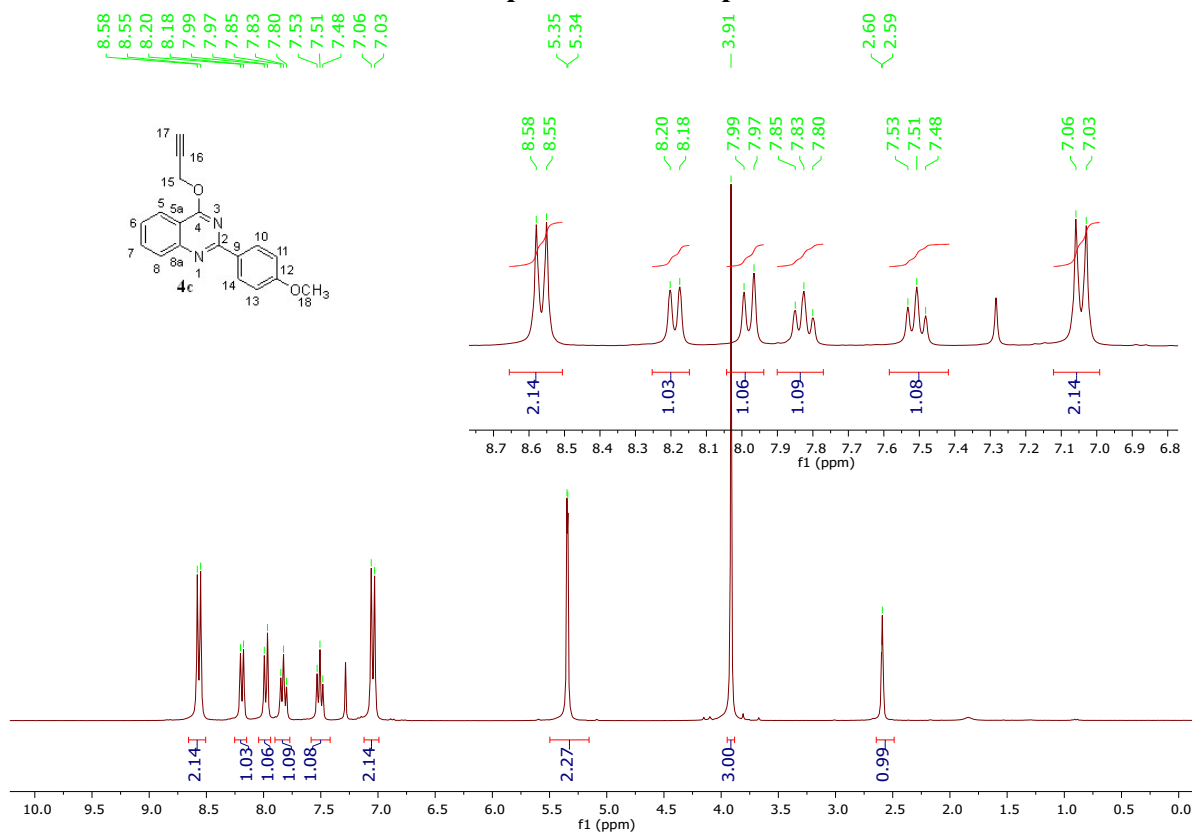

**<sup>1</sup>H NMR spectrum of compound 4c**

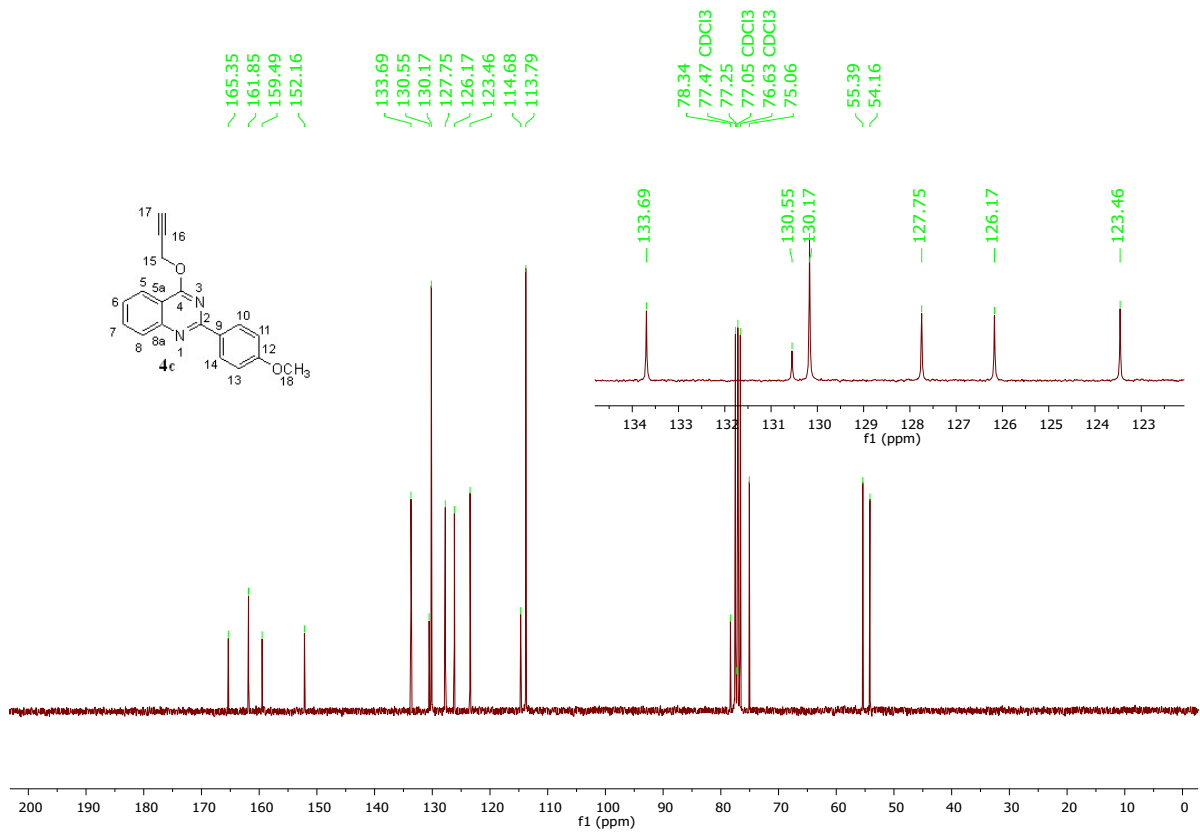

**<sup>13</sup>C NMR spectrum of compound 4c**

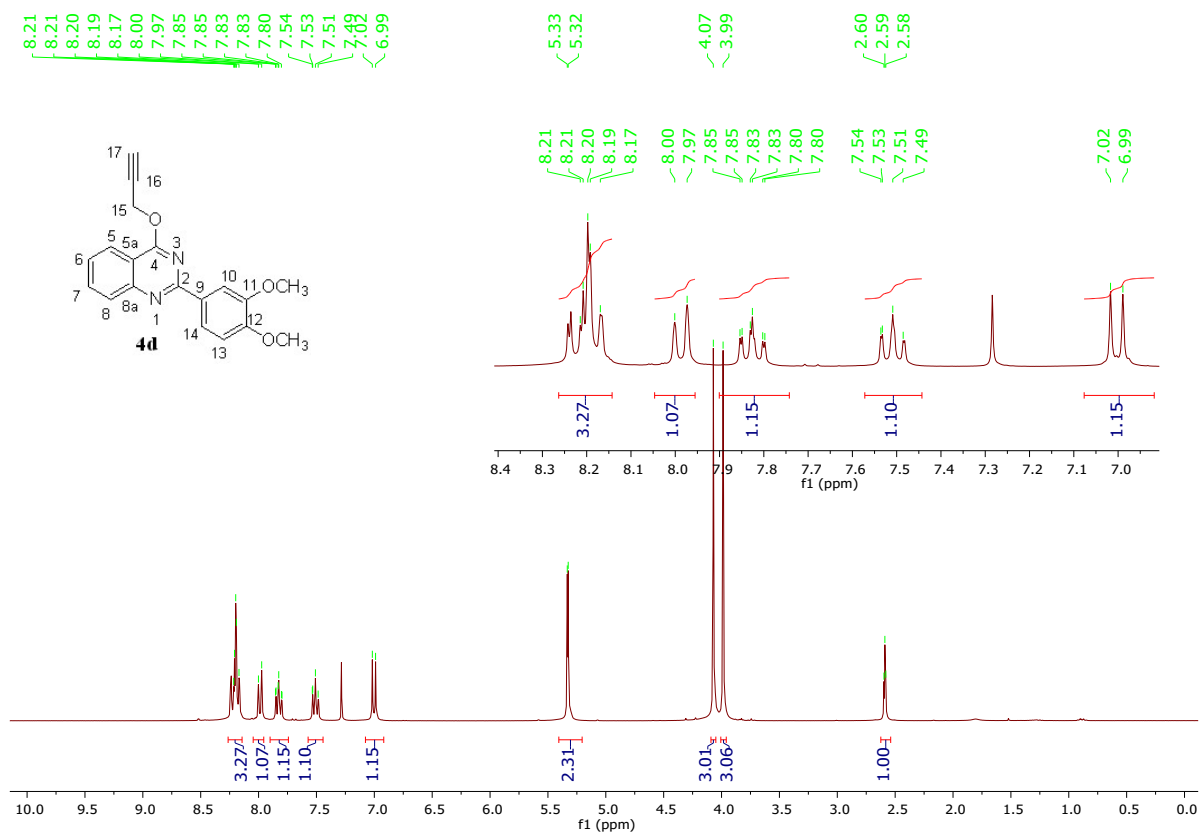

**<sup>1</sup>H NMR spectrum of compound 4d**

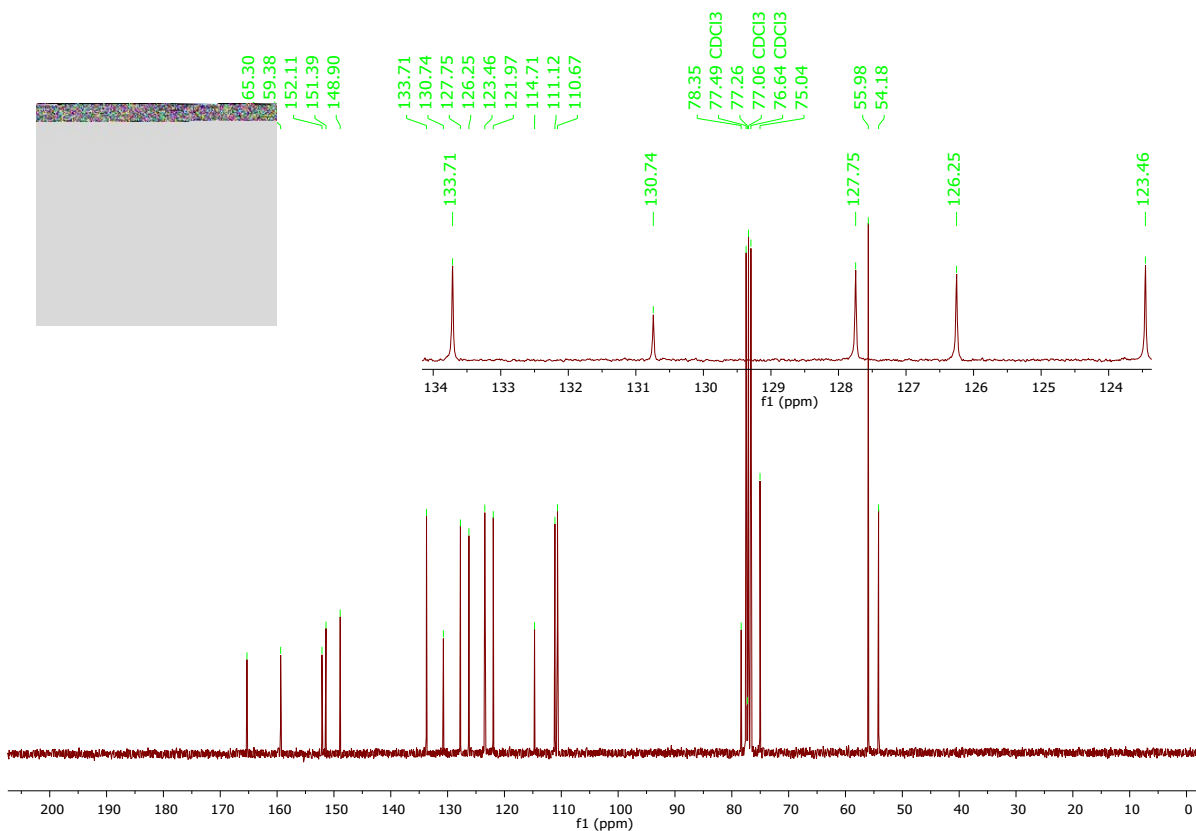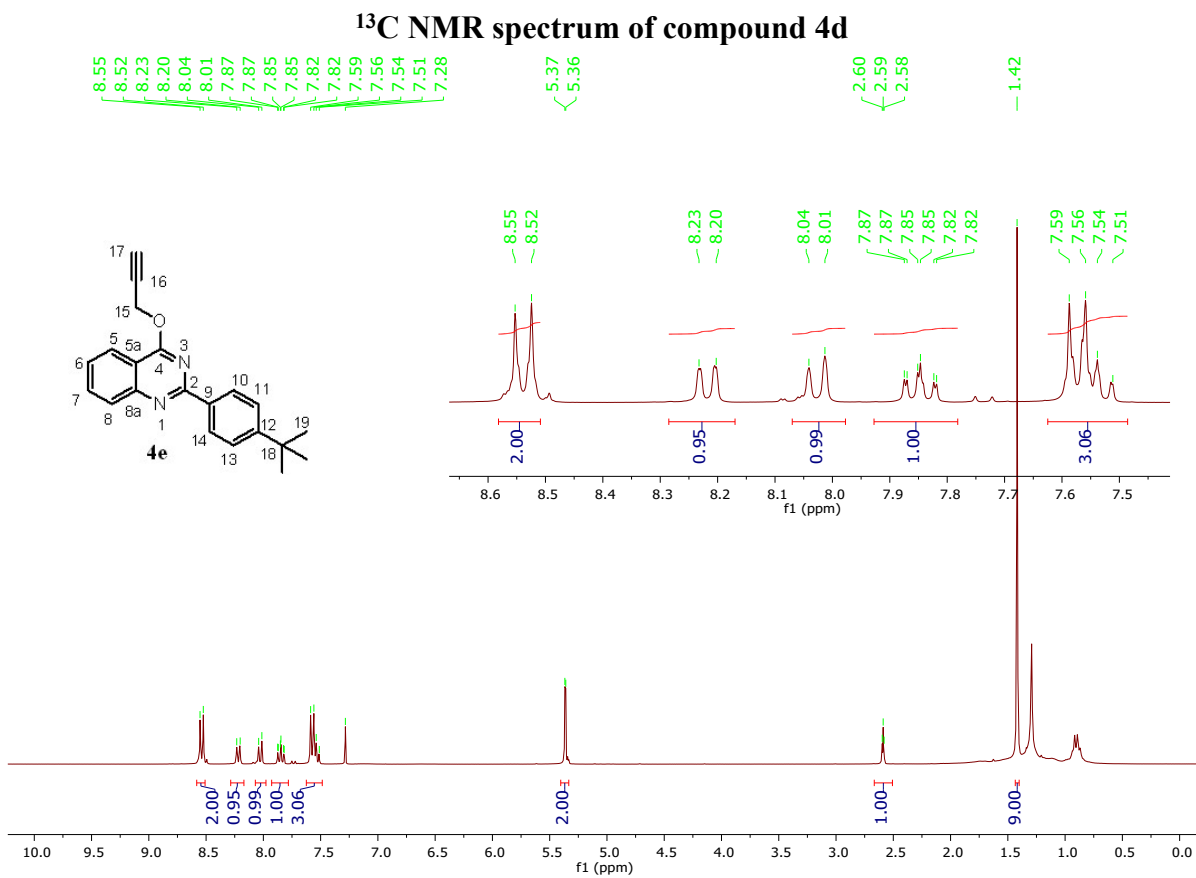

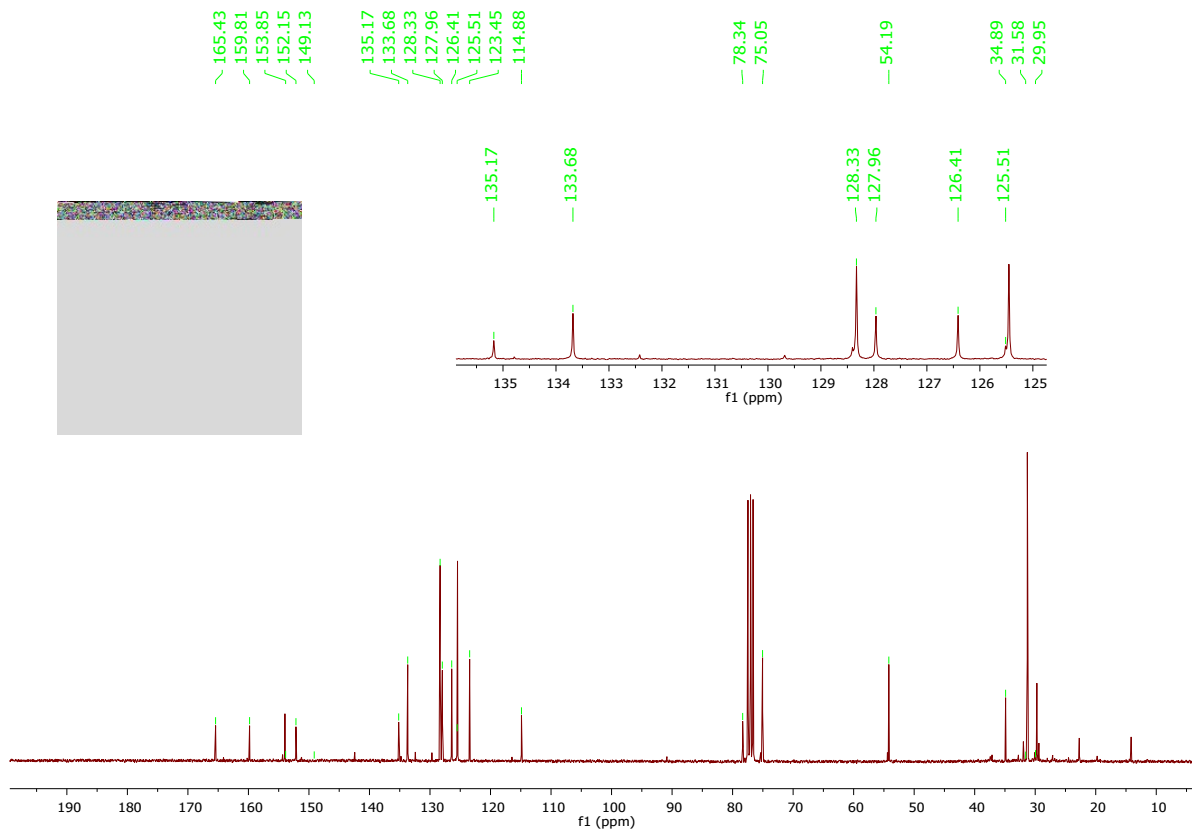

**<sup>13</sup>C NMR spectrum of compound 4e**

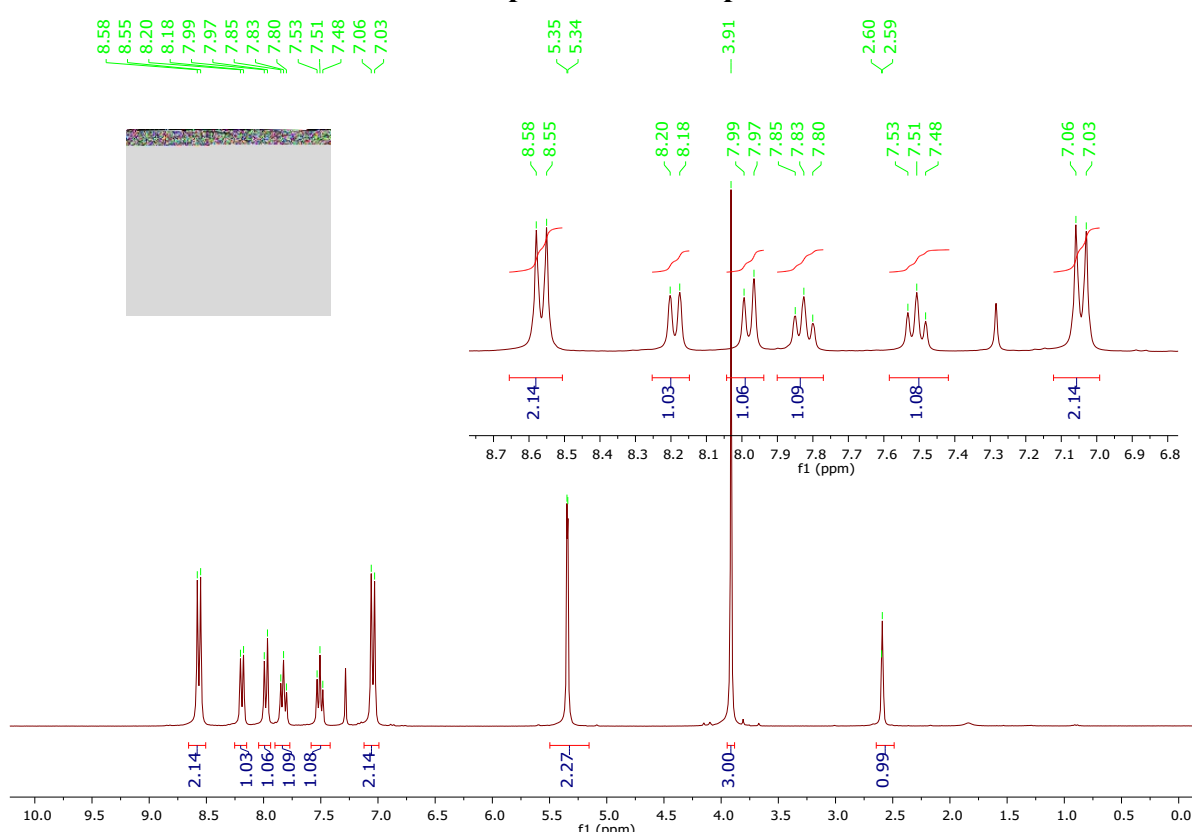

**<sup>1</sup>H NMR spectrum of compound 4f**

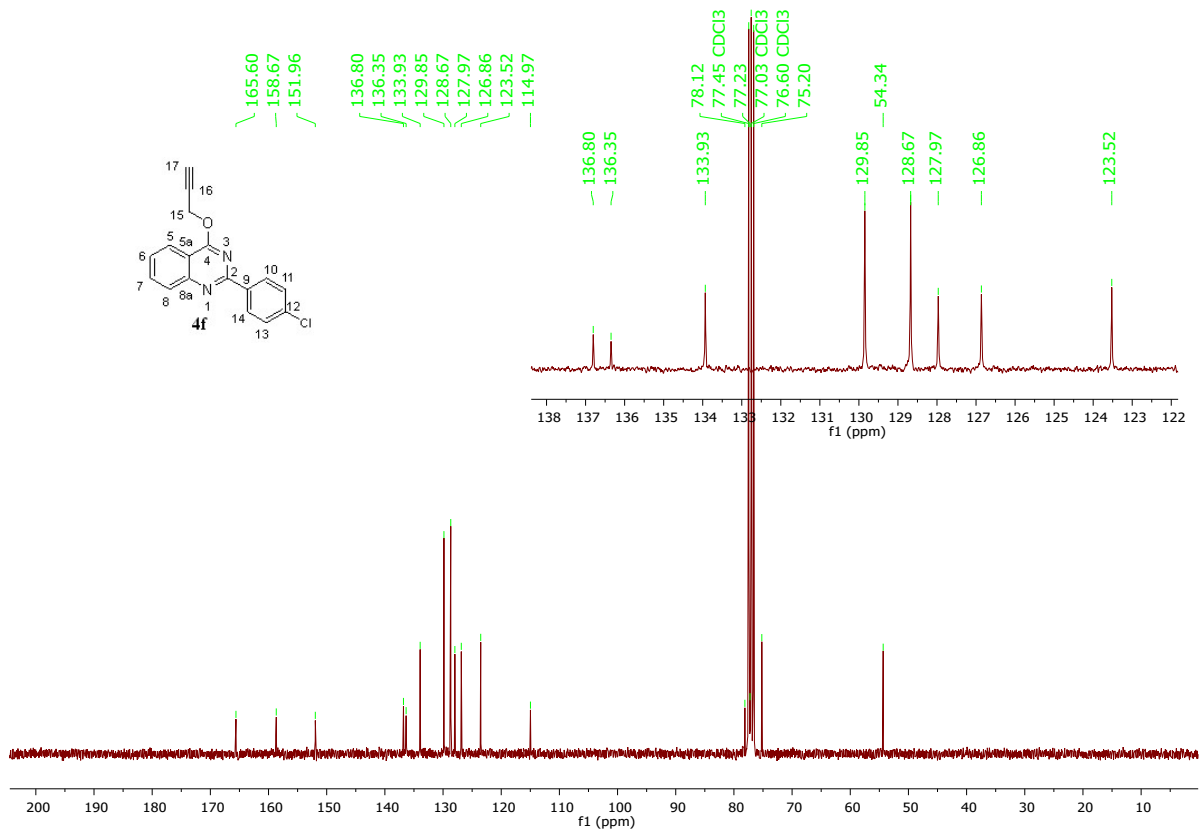

**<sup>13</sup>C NMR spectrum of compound 4f**

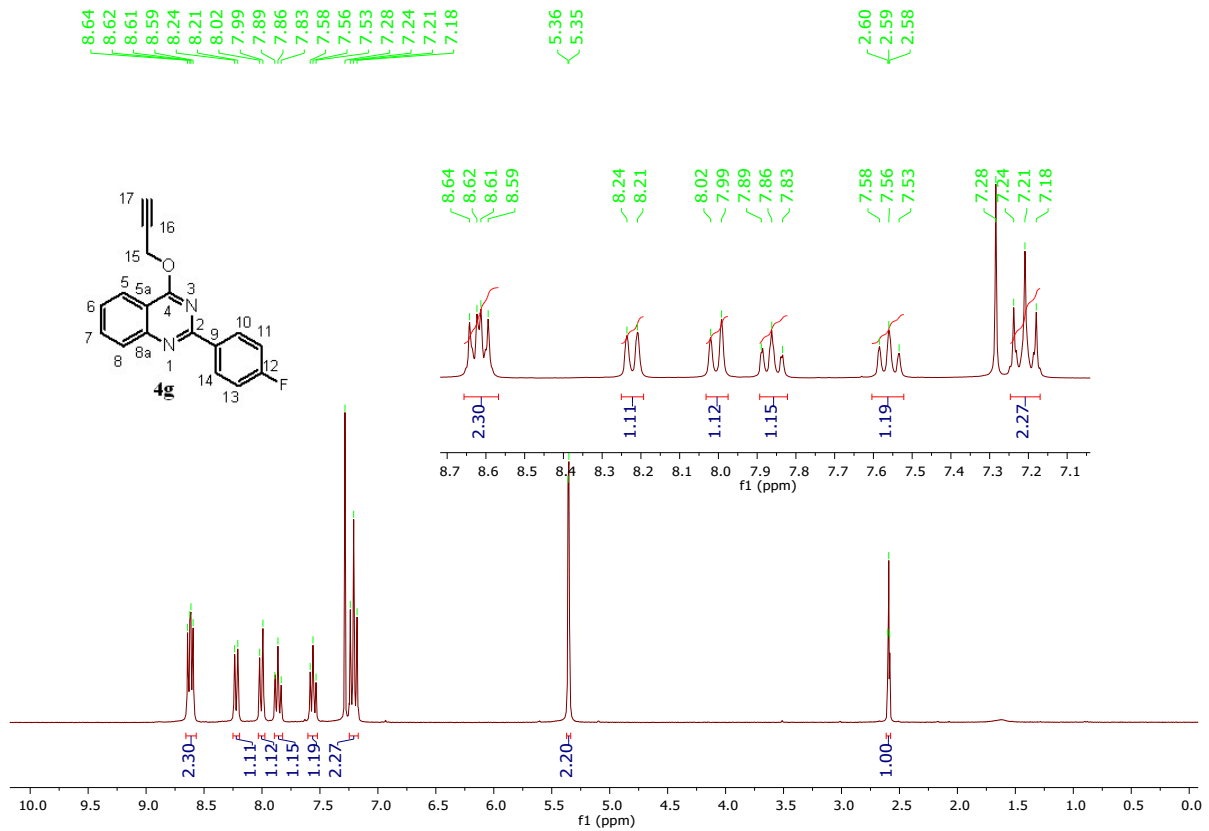

**<sup>1</sup>H NMR spectrum of compound 4g**

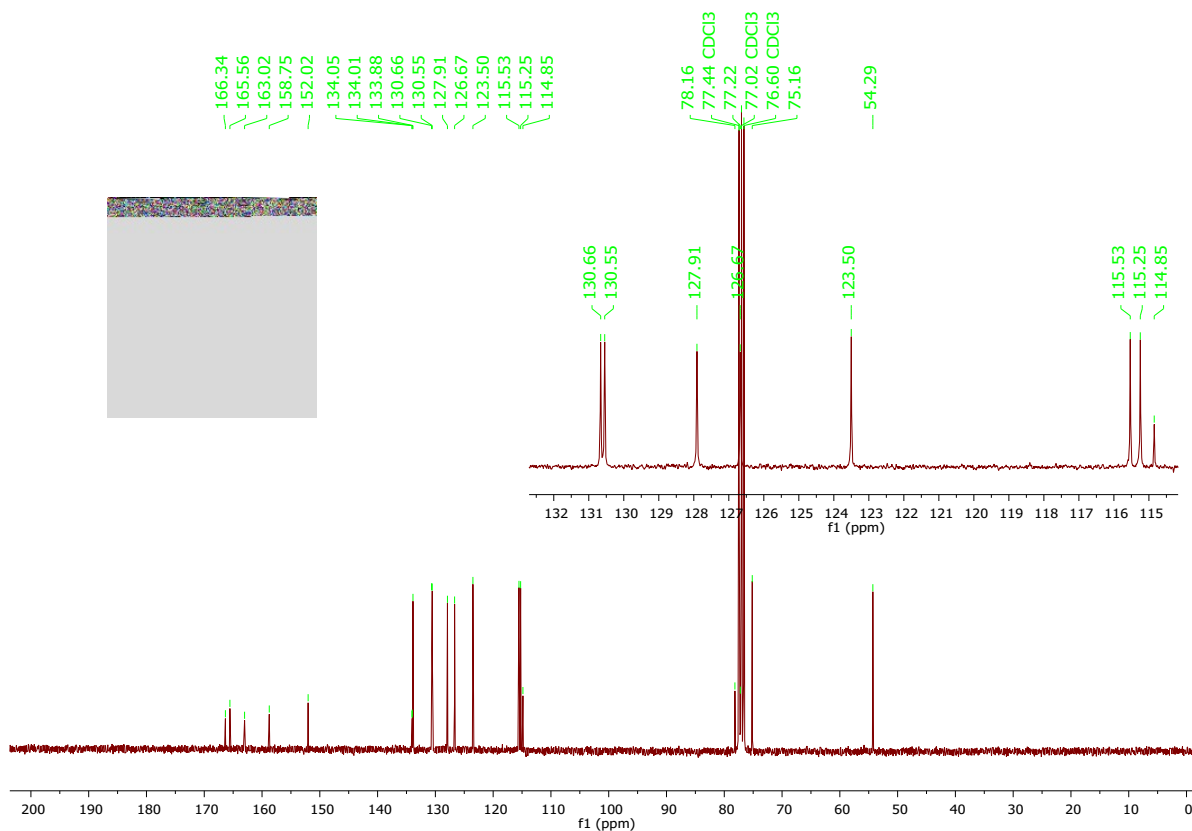

<sup>13</sup>C NMR spectrum of compound 4g

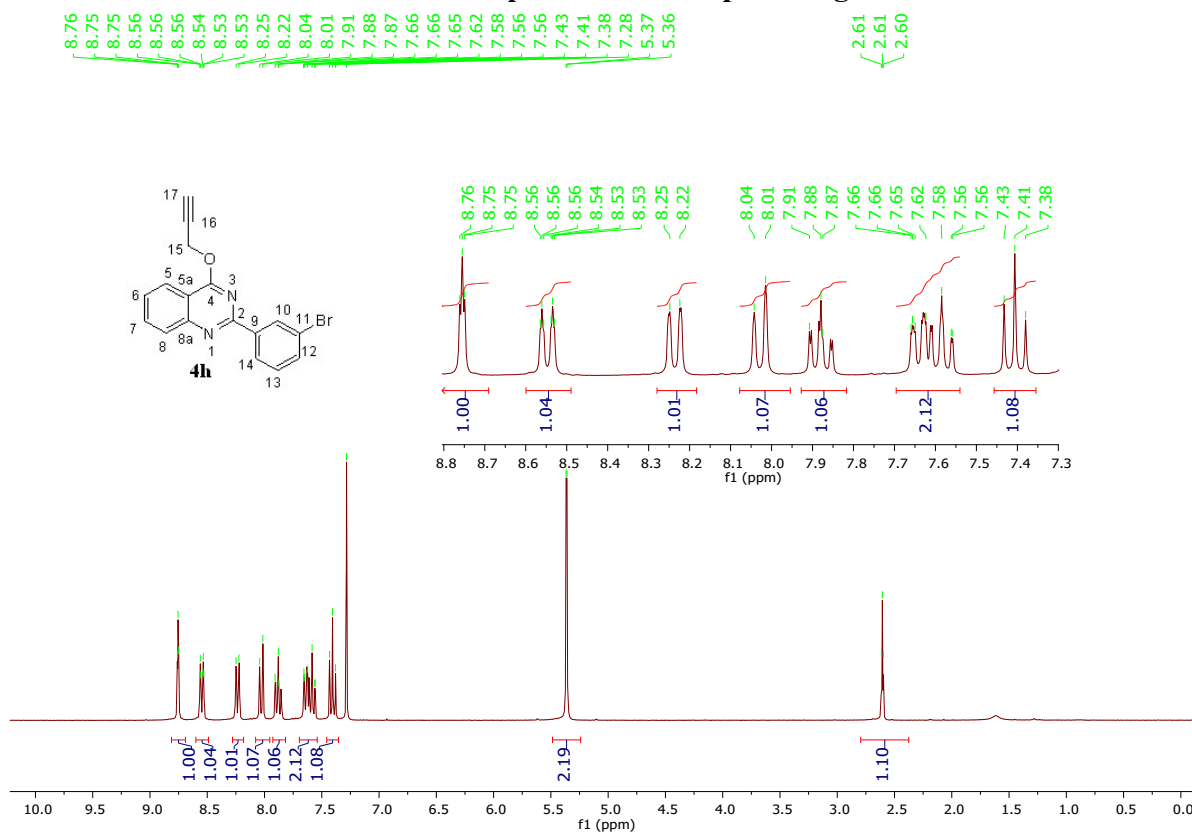

<sup>1</sup>H NMR spectrum of compound 4h

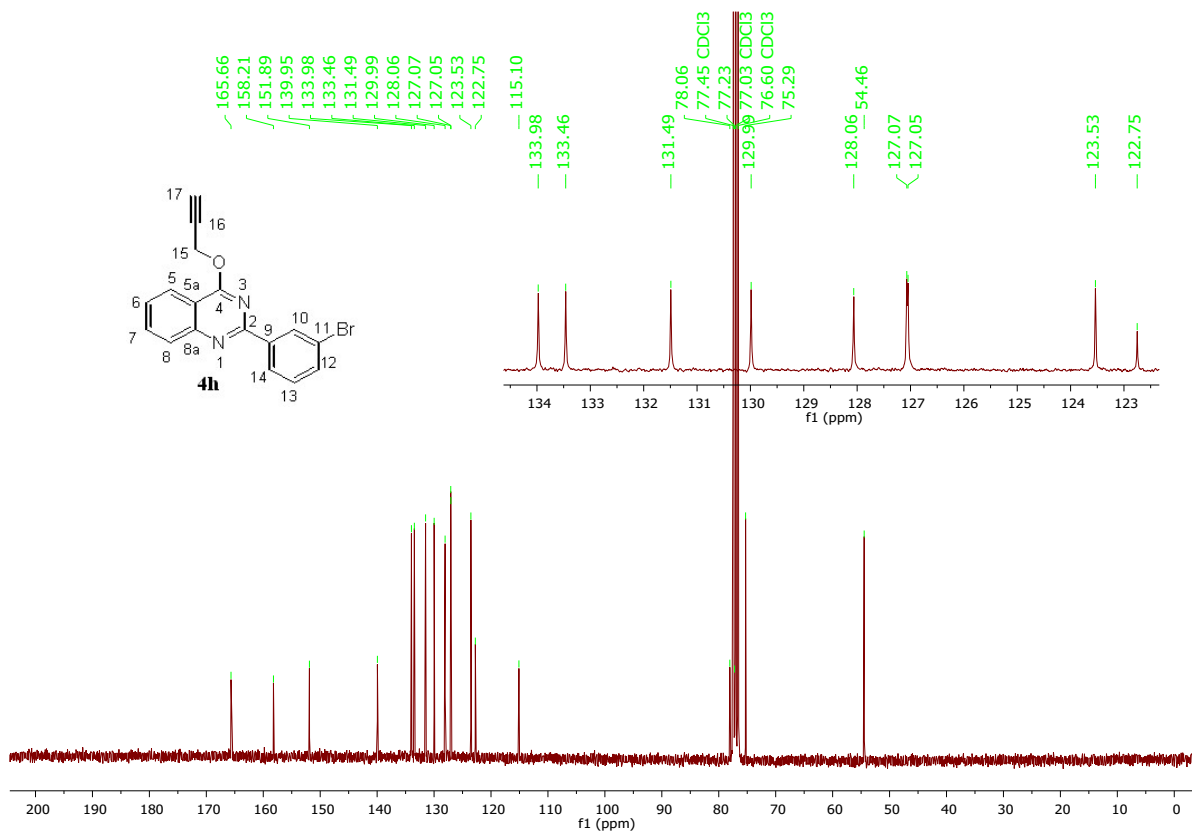

**<sup>13</sup>C NMR spectrum of compound 4h**

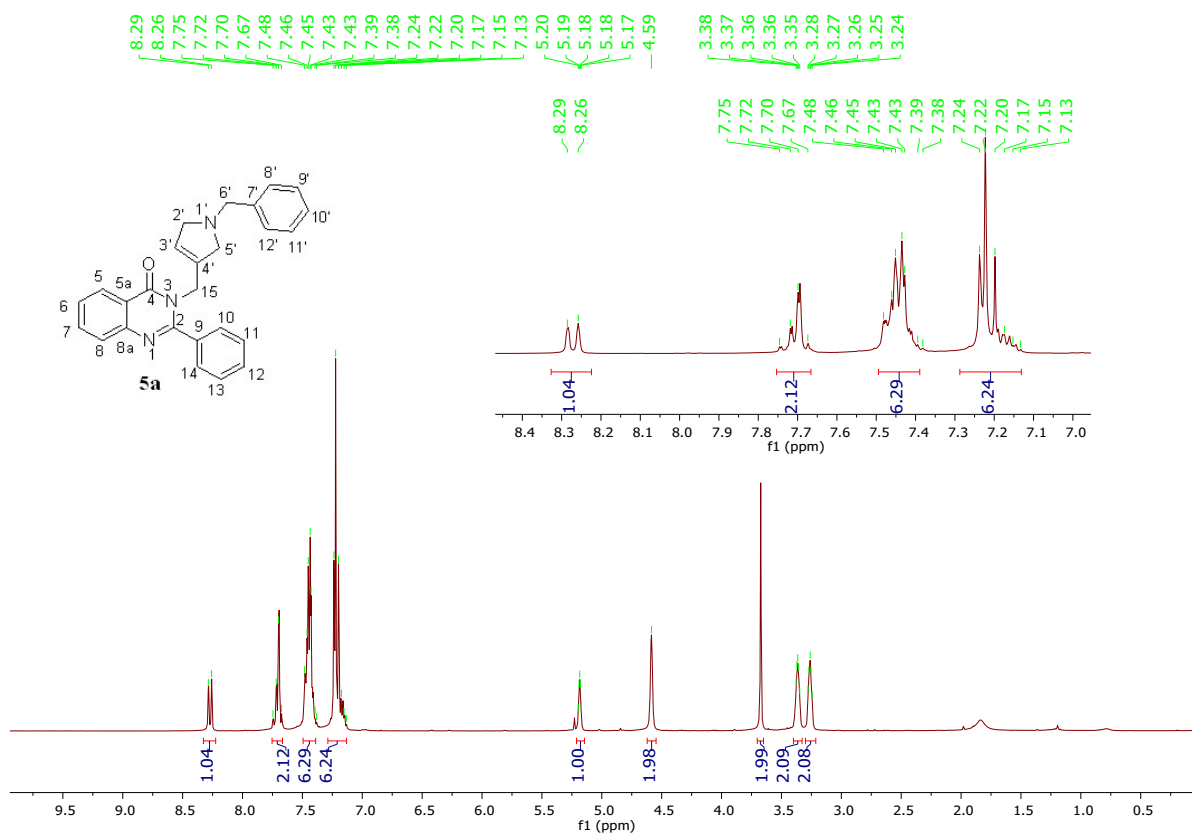

**<sup>1</sup>H NMR spectrum of compound 5a**

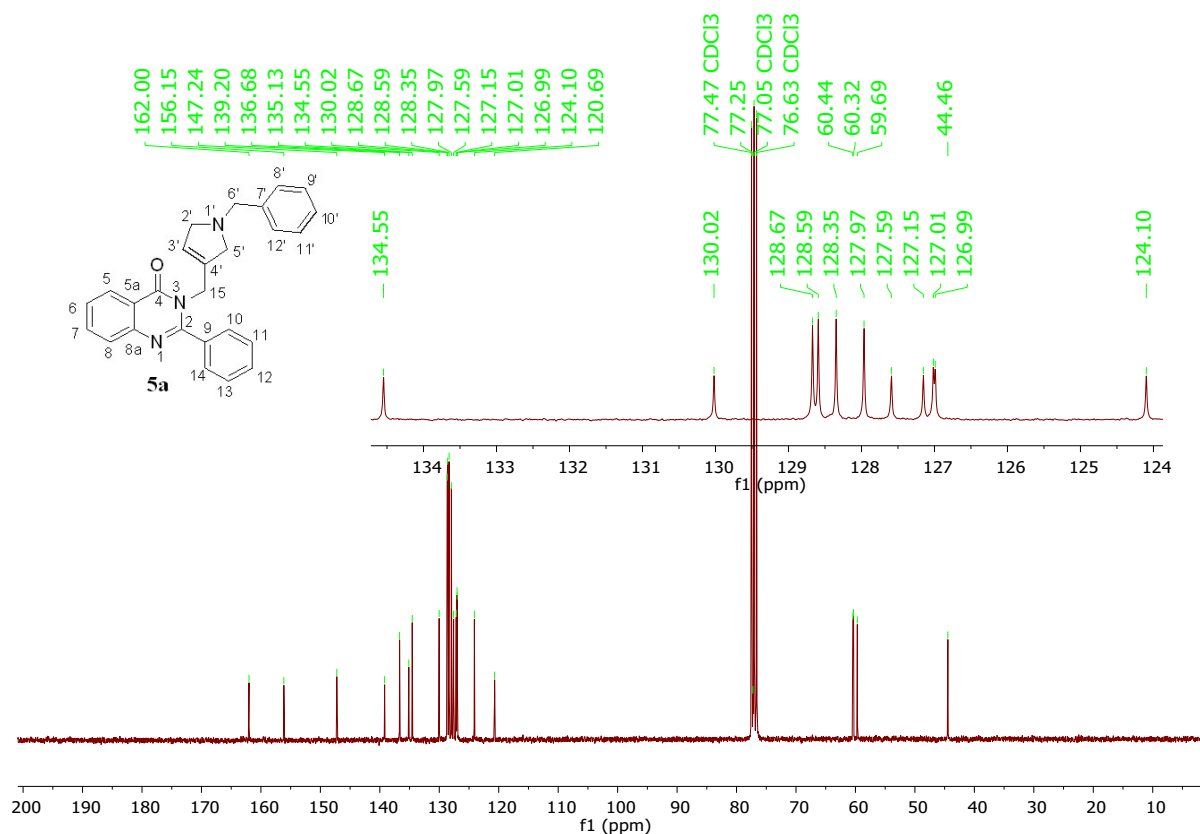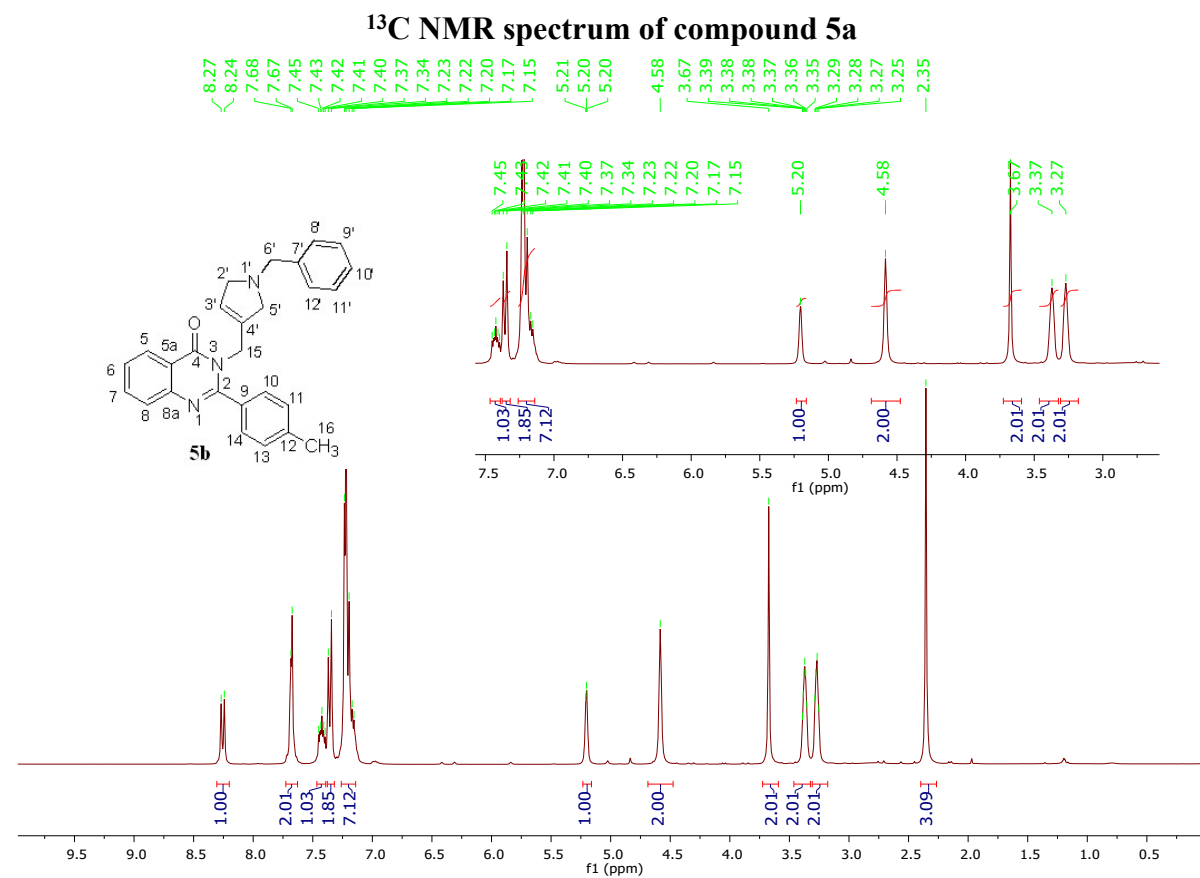



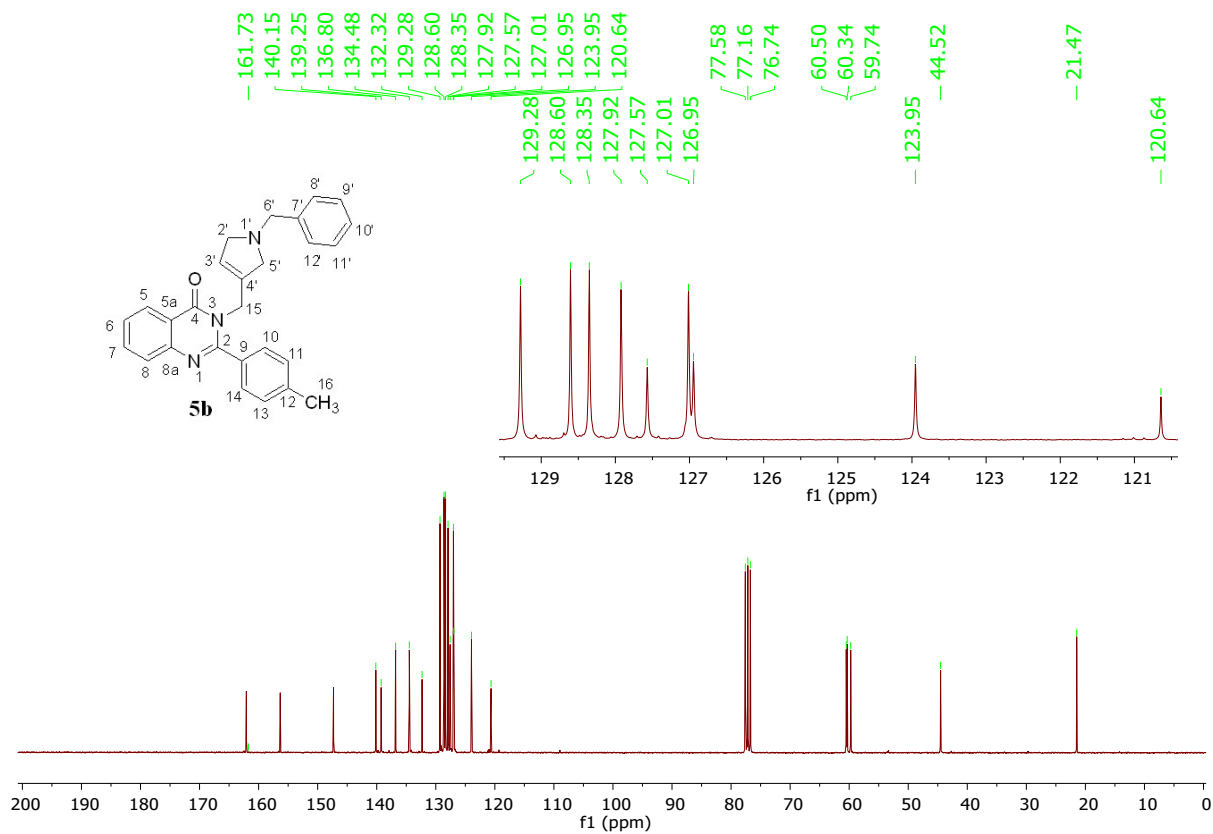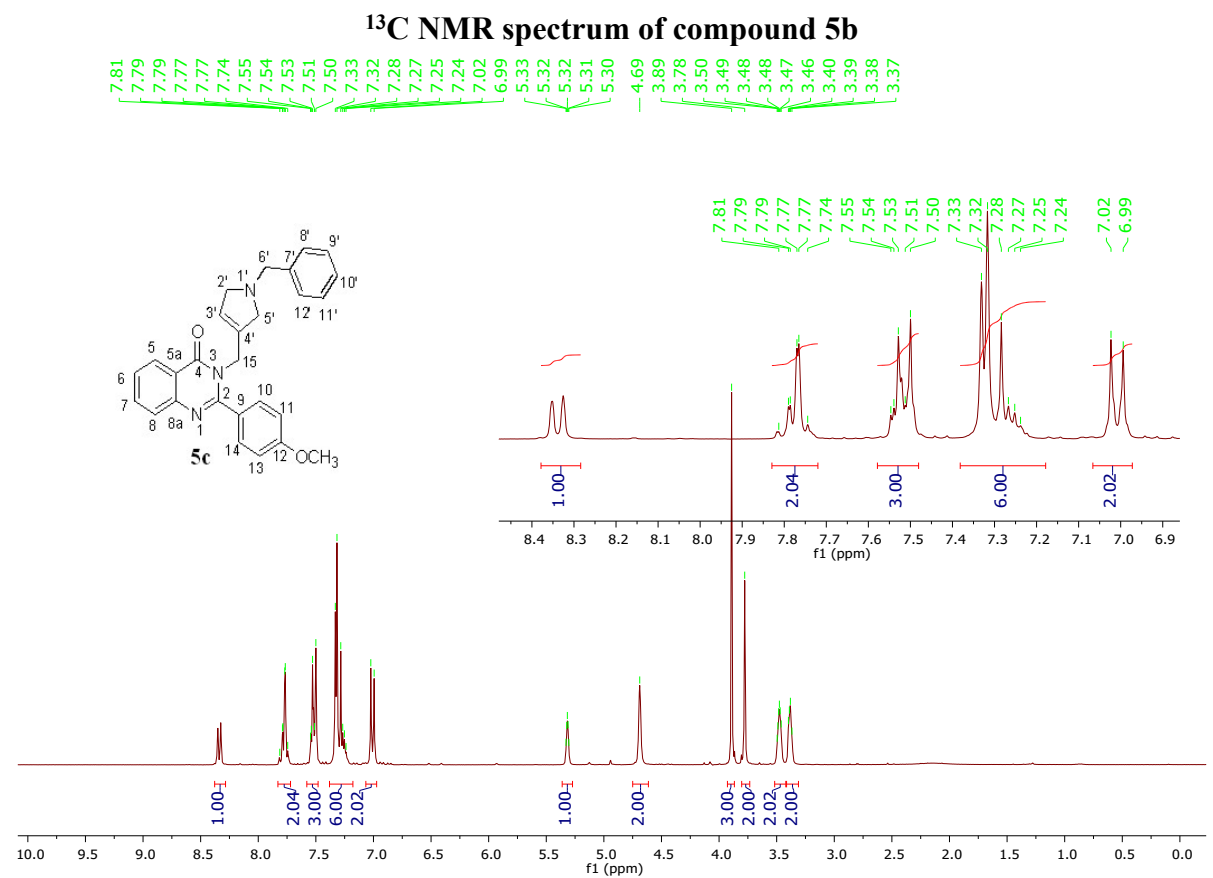

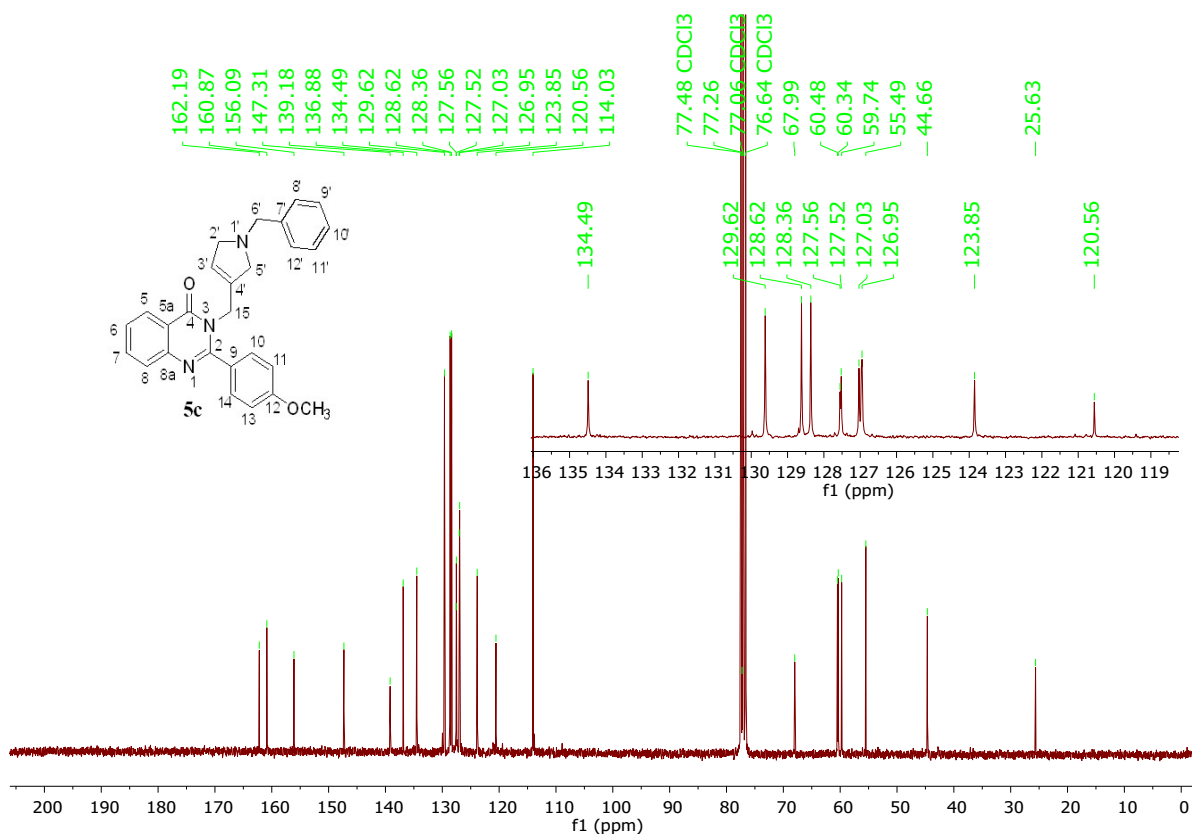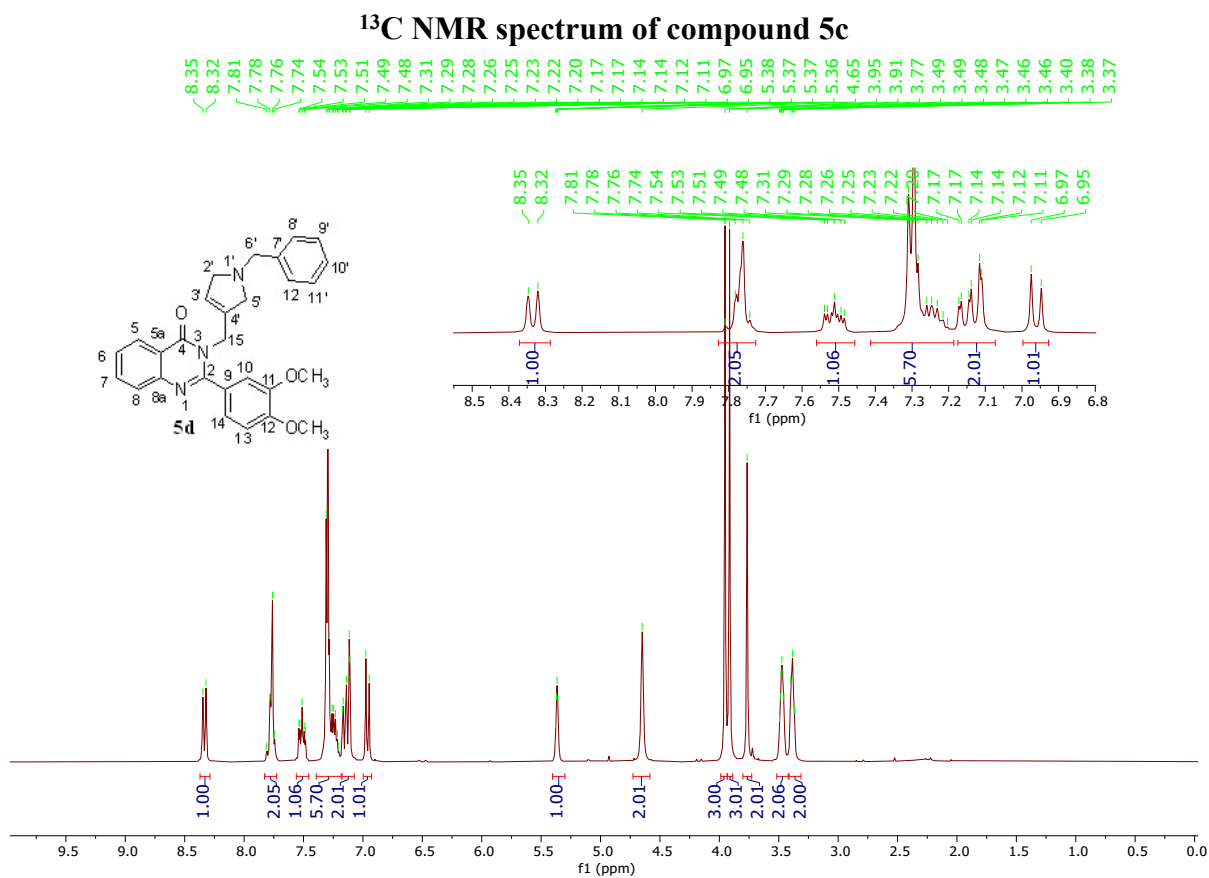

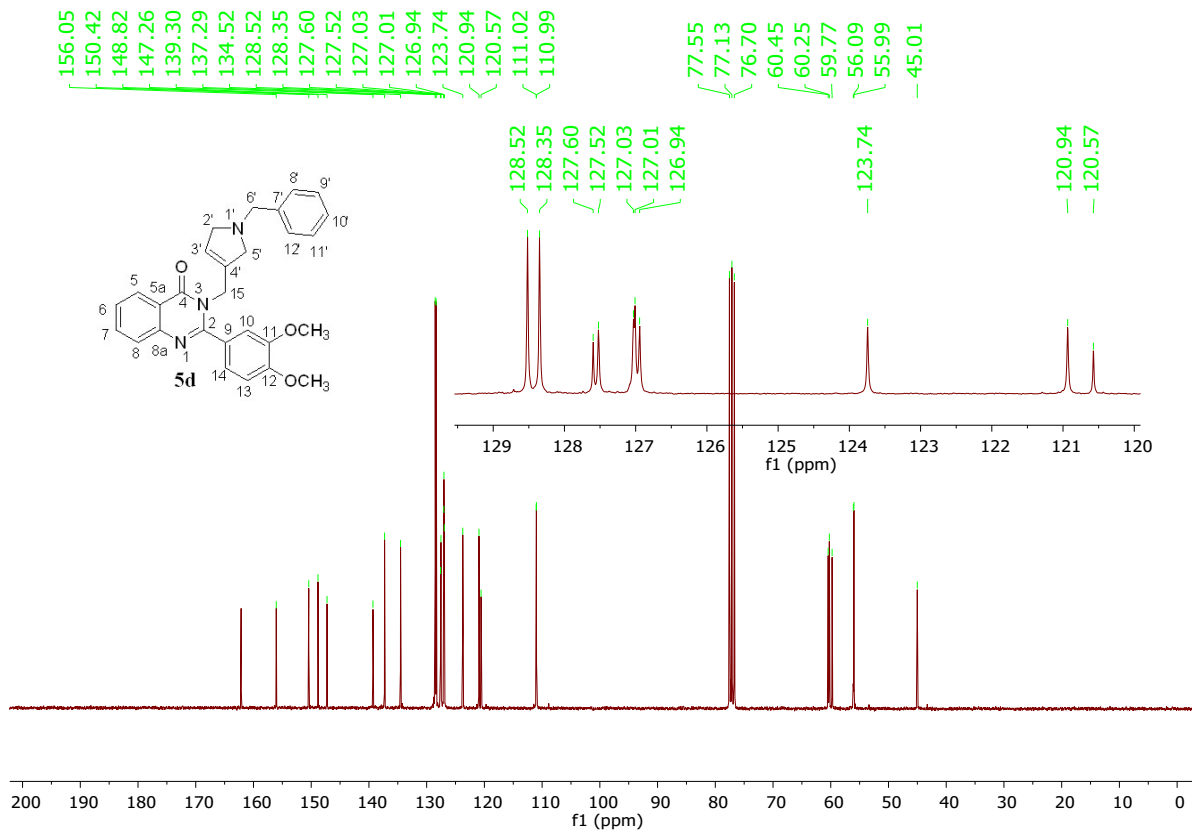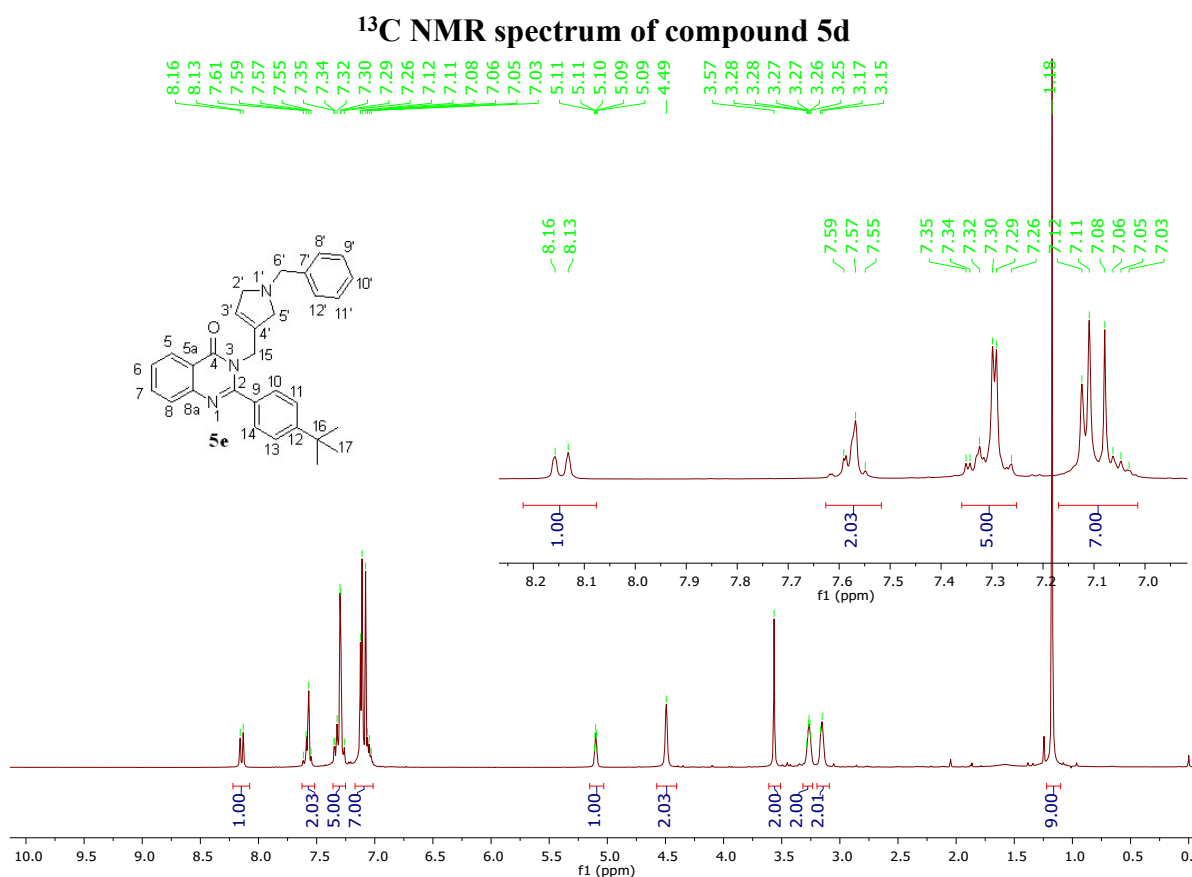

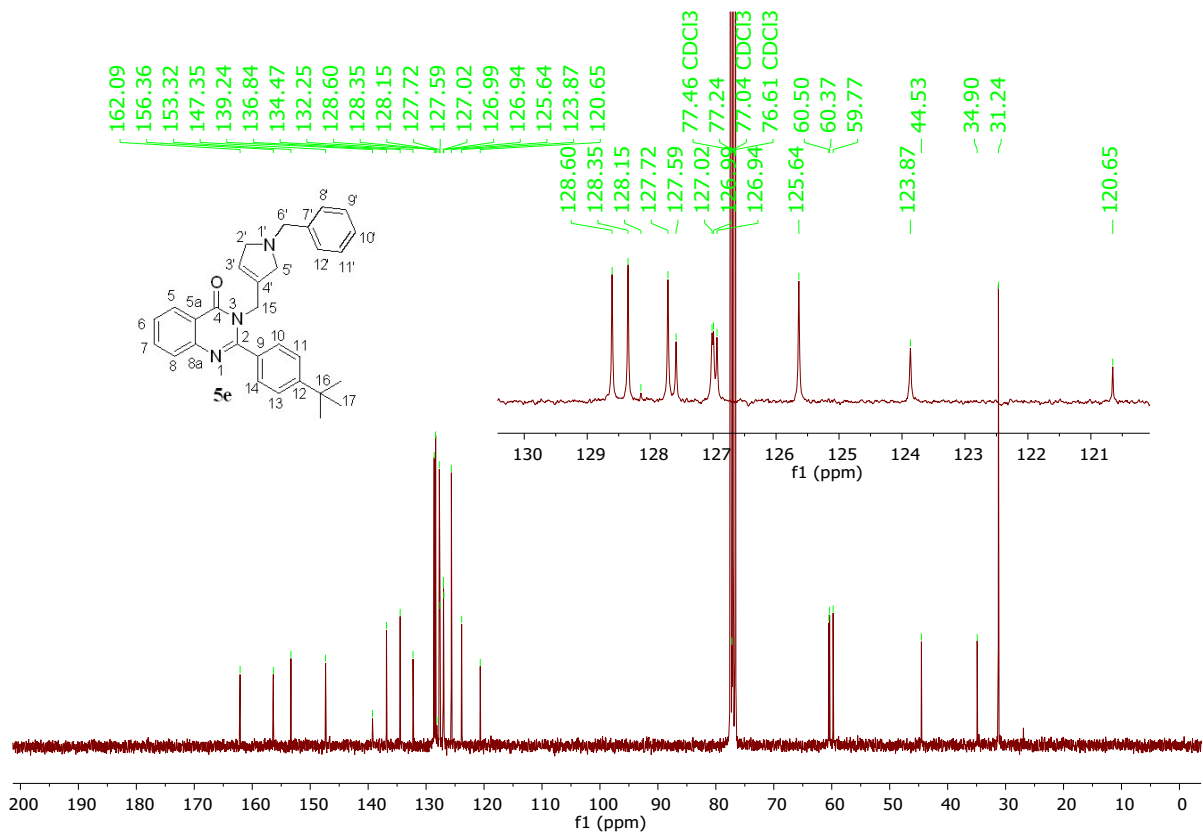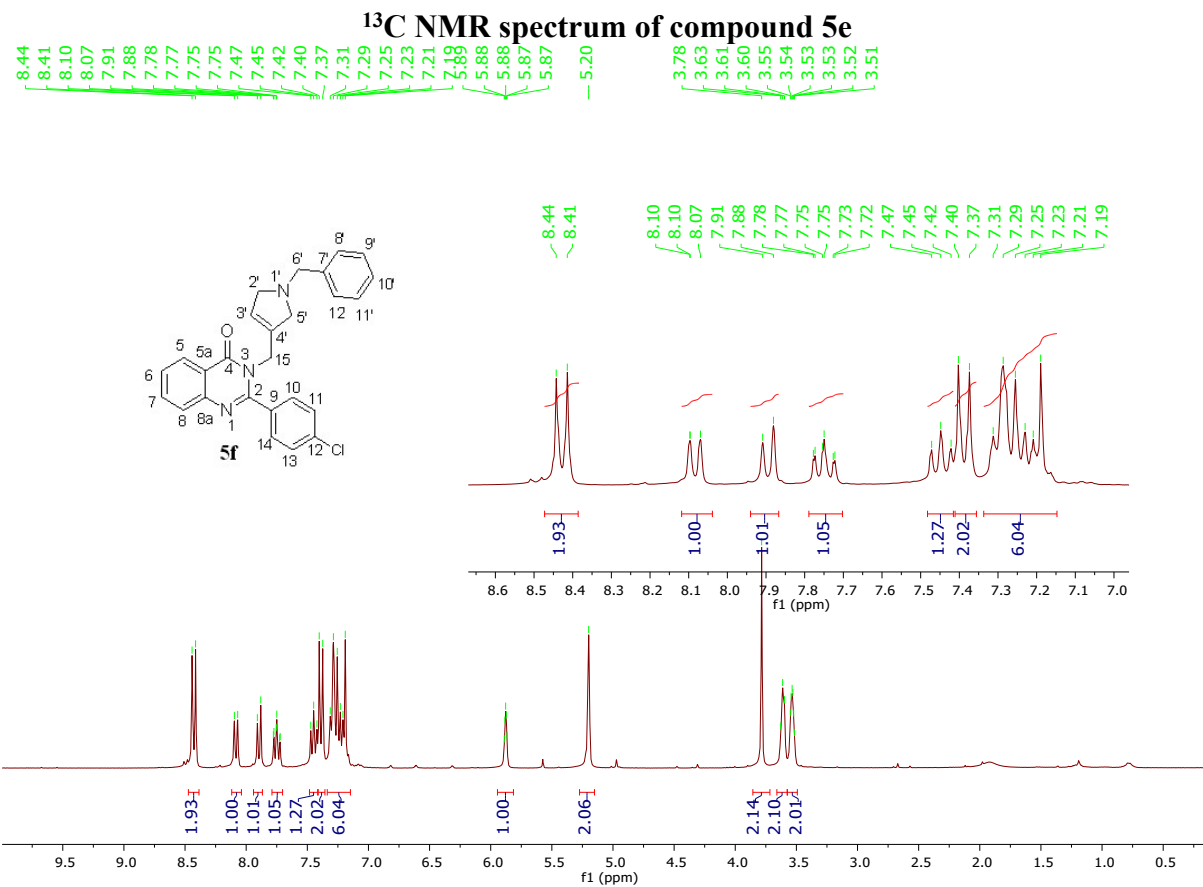

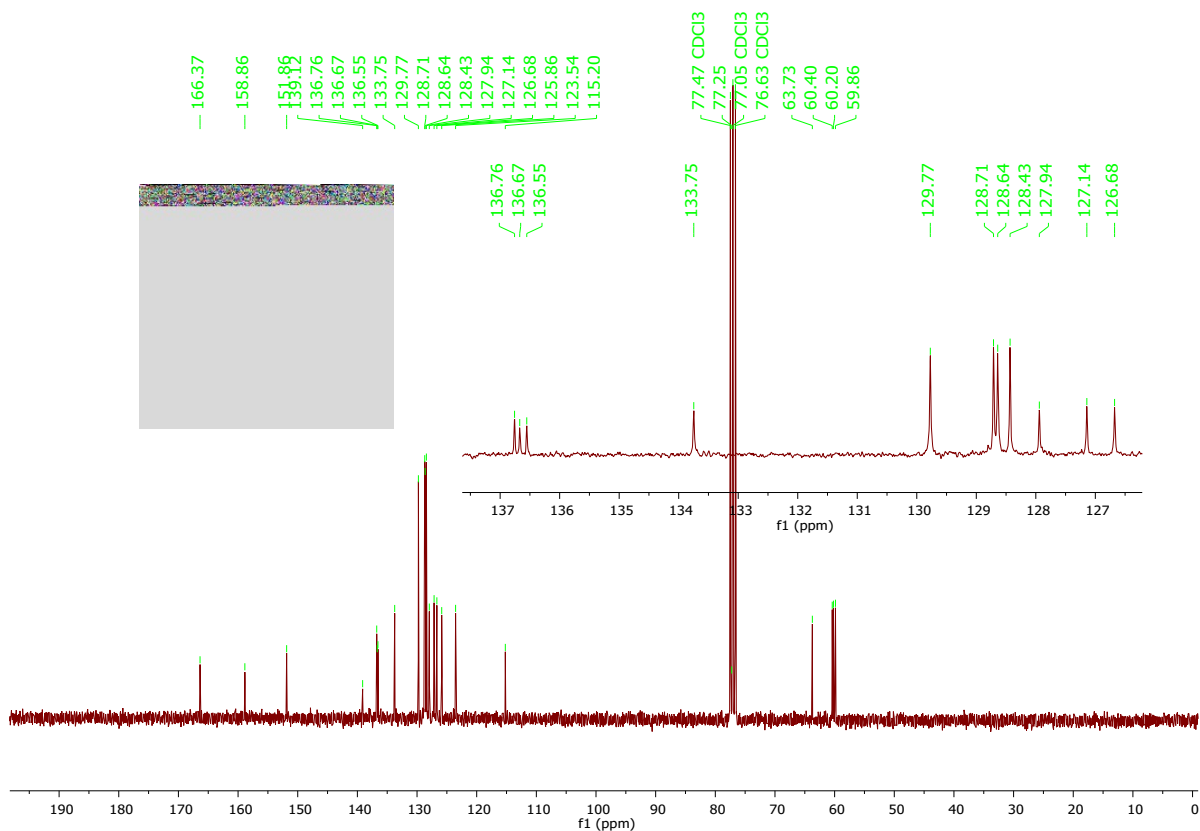

**<sup>13</sup>C NMR spectrum of compound 5f**

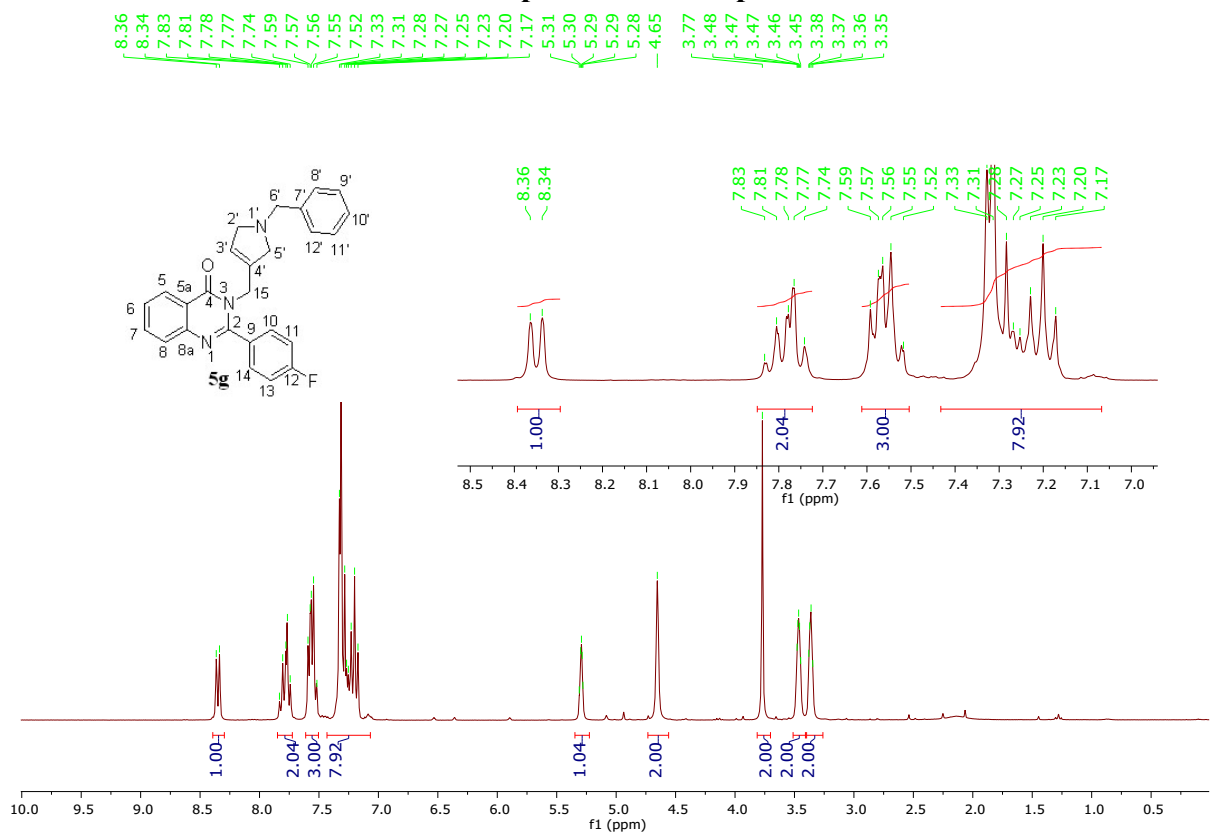

**<sup>1</sup>H NMR spectrum of compound 5g**

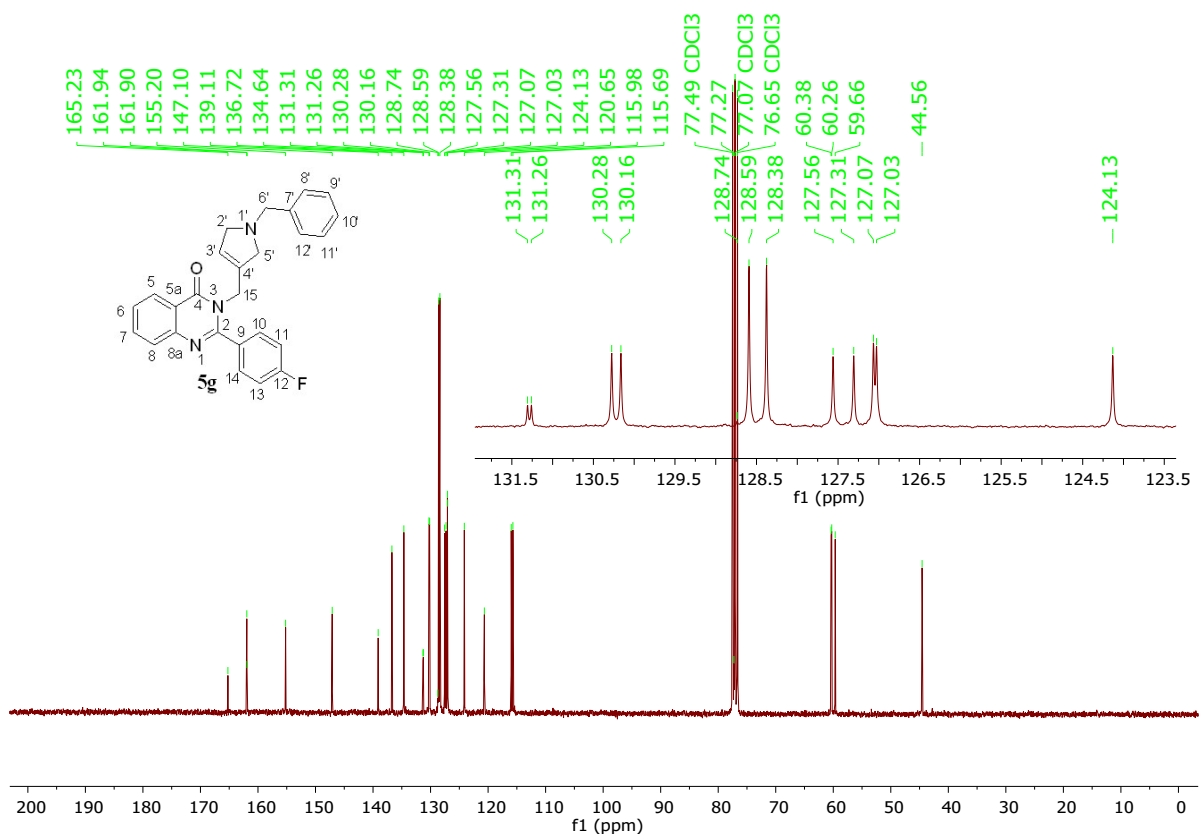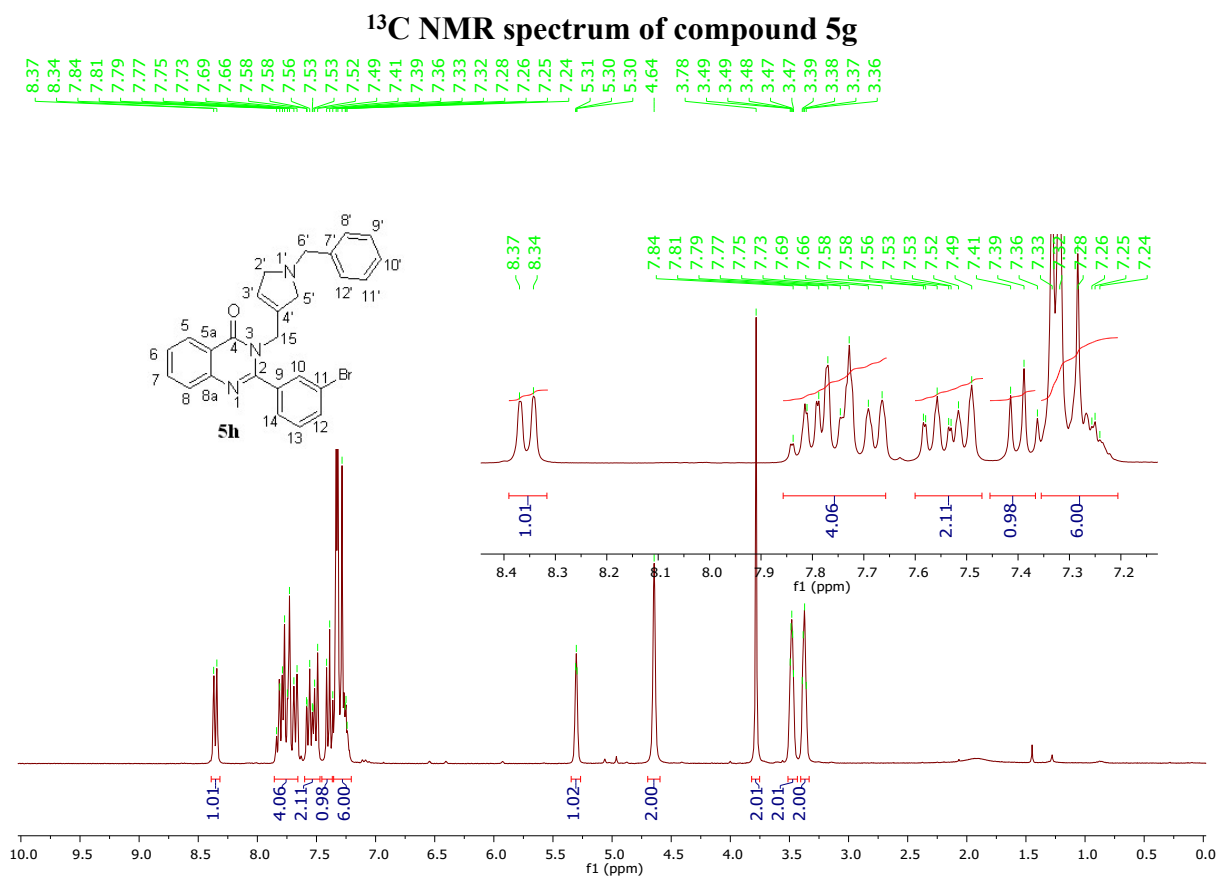

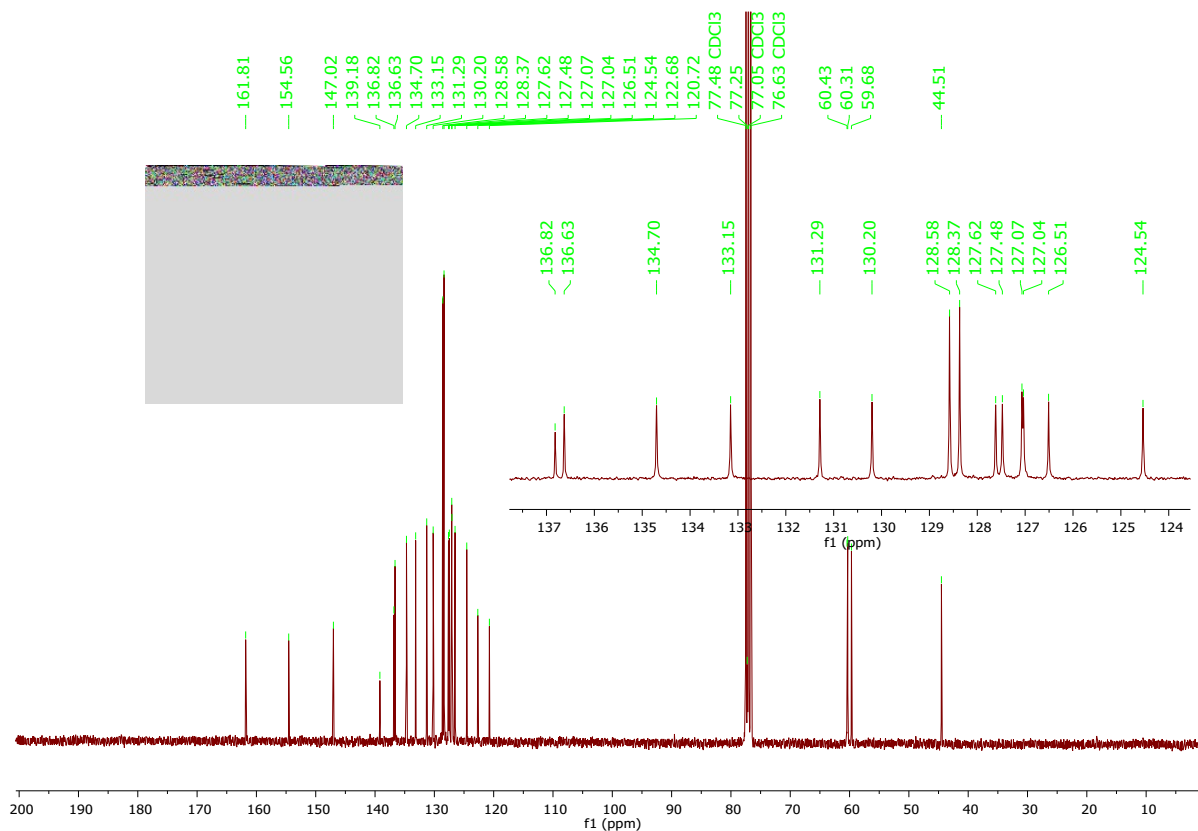

<sup>13</sup>C NMR spectrum of compound 5h

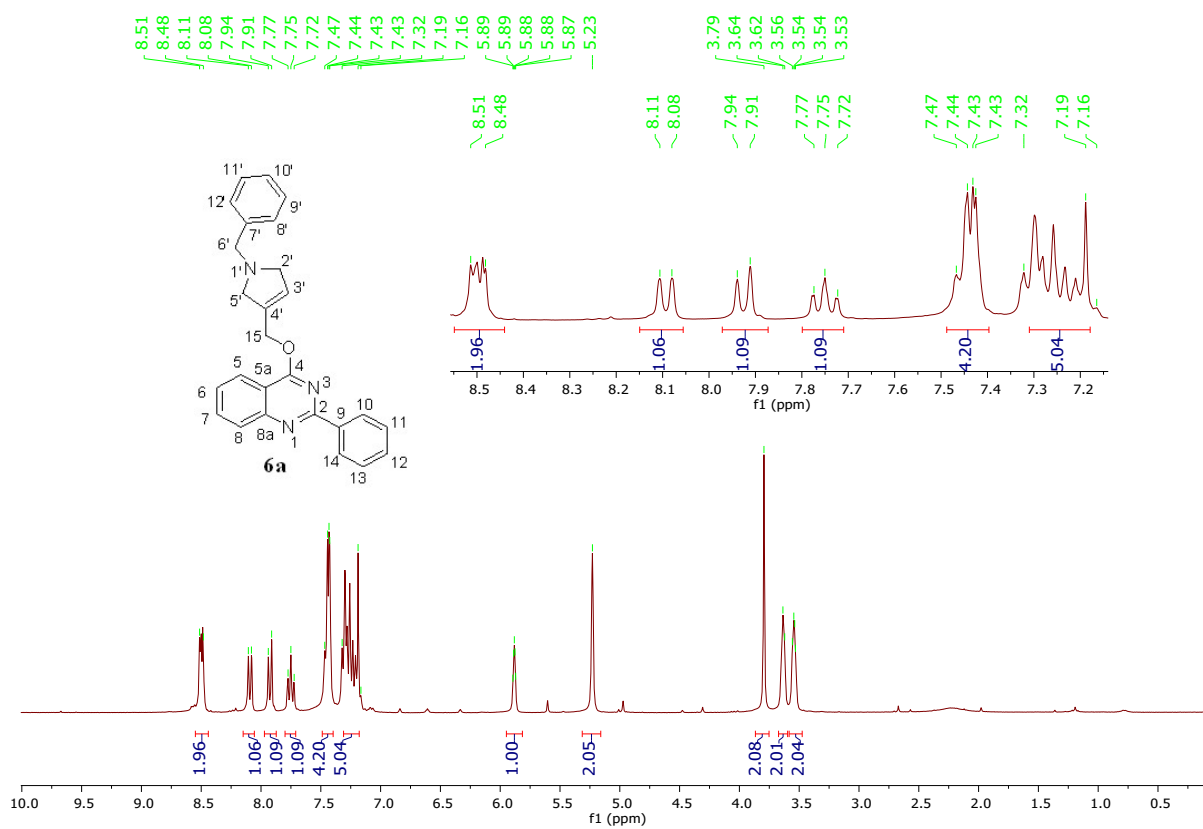

<sup>1</sup>H NMR spectrum of compound 6a

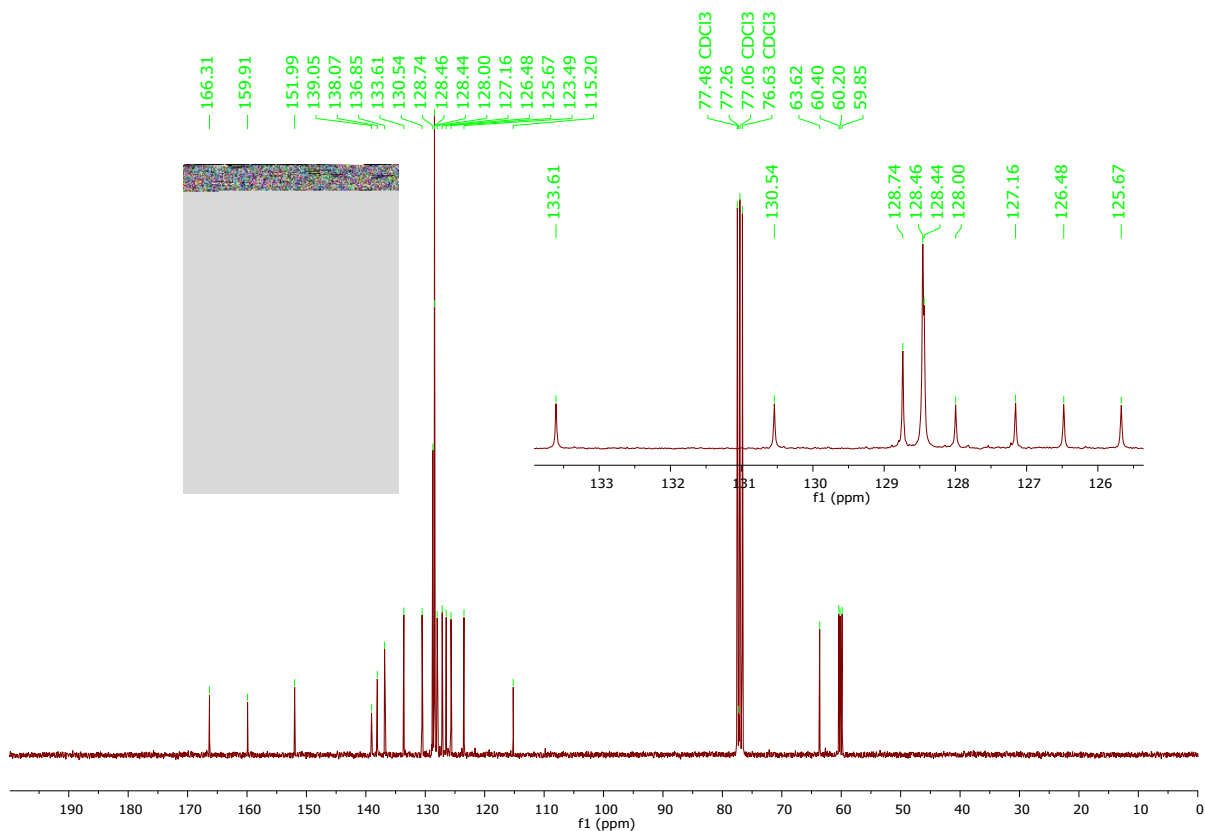

<sup>13</sup>C NMR spectrum of compound 6a

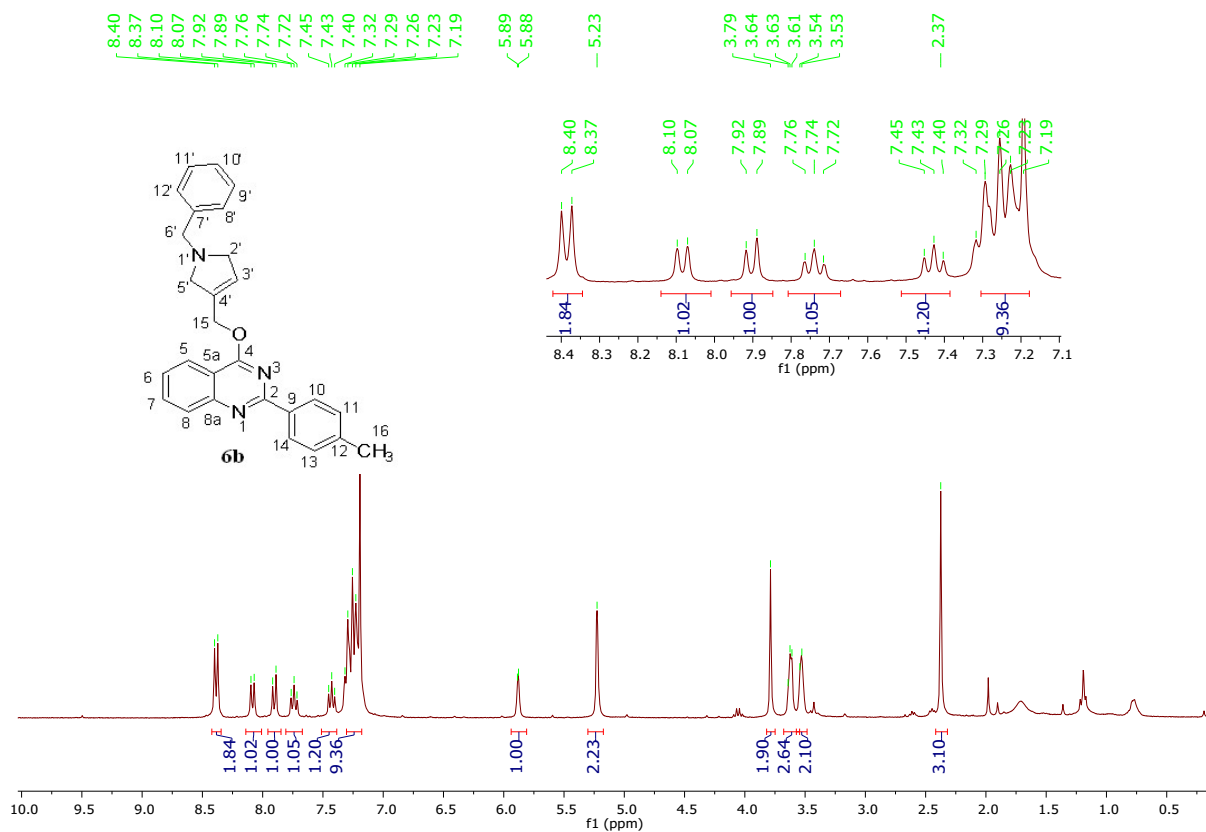

<sup>1</sup>H NMR spectrum of compound 6b



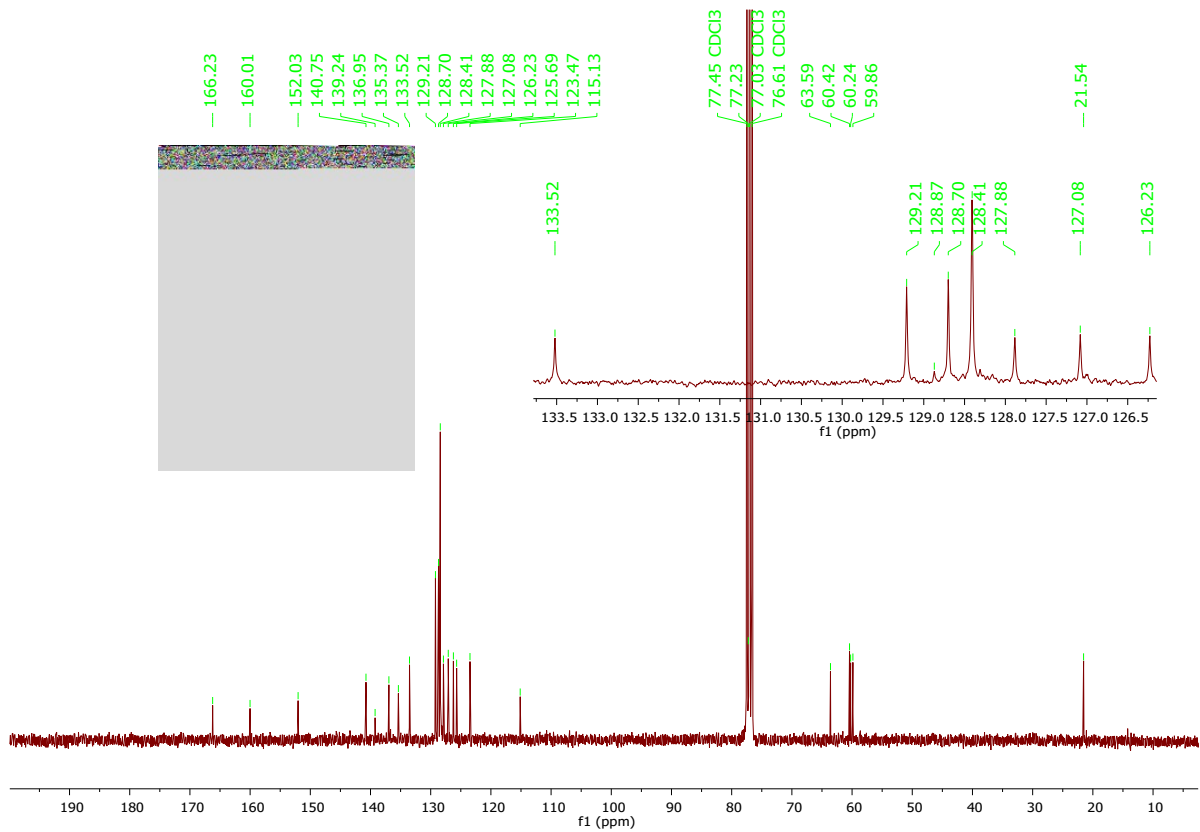

<sup>13</sup>C NMR spectrum of compound 6b

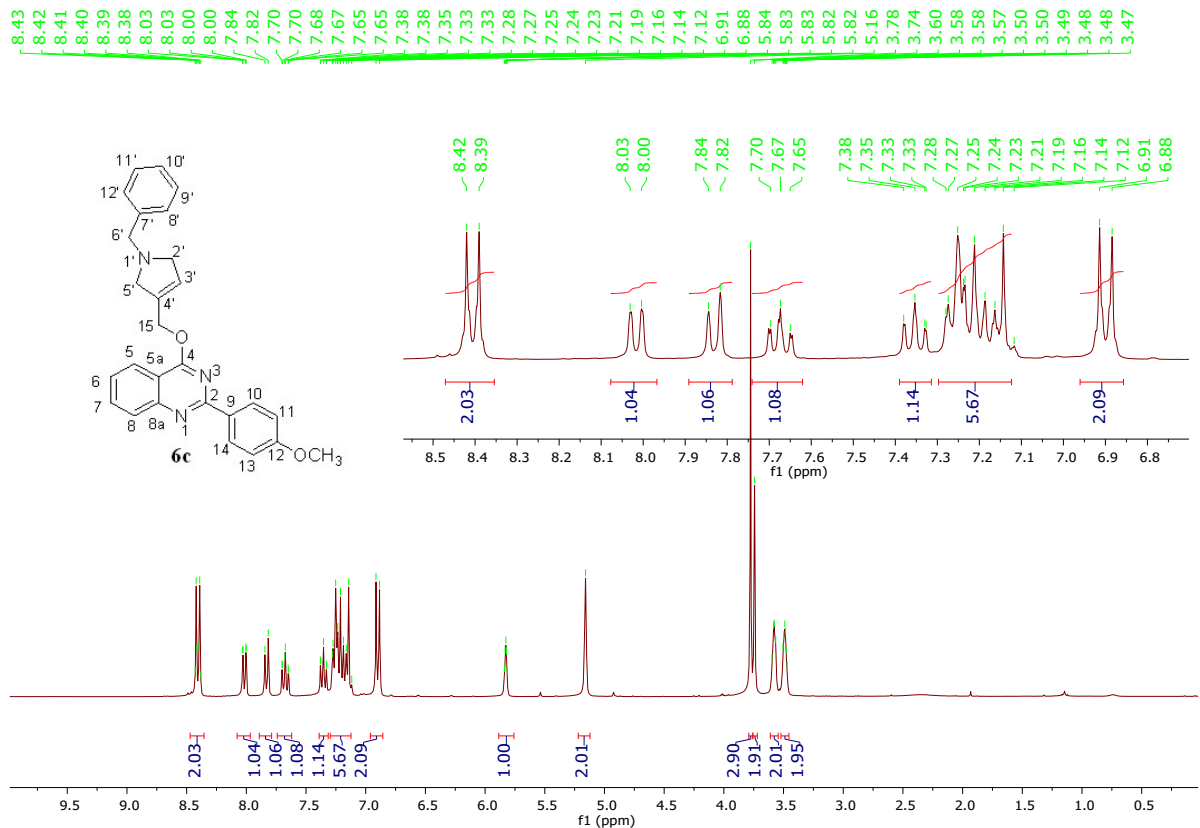

<sup>1</sup>H NMR spectrum of compound 6c

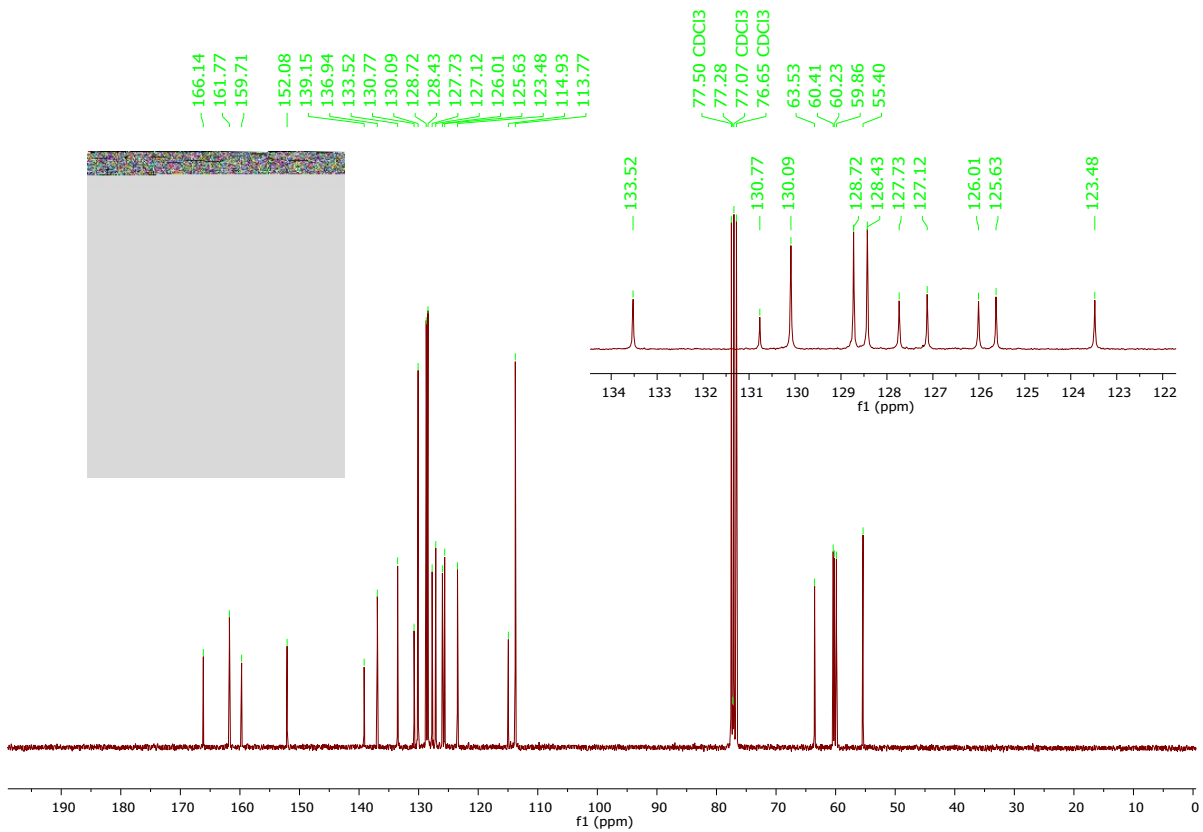

<sup>13</sup>C NMR spectrum of compound 6c

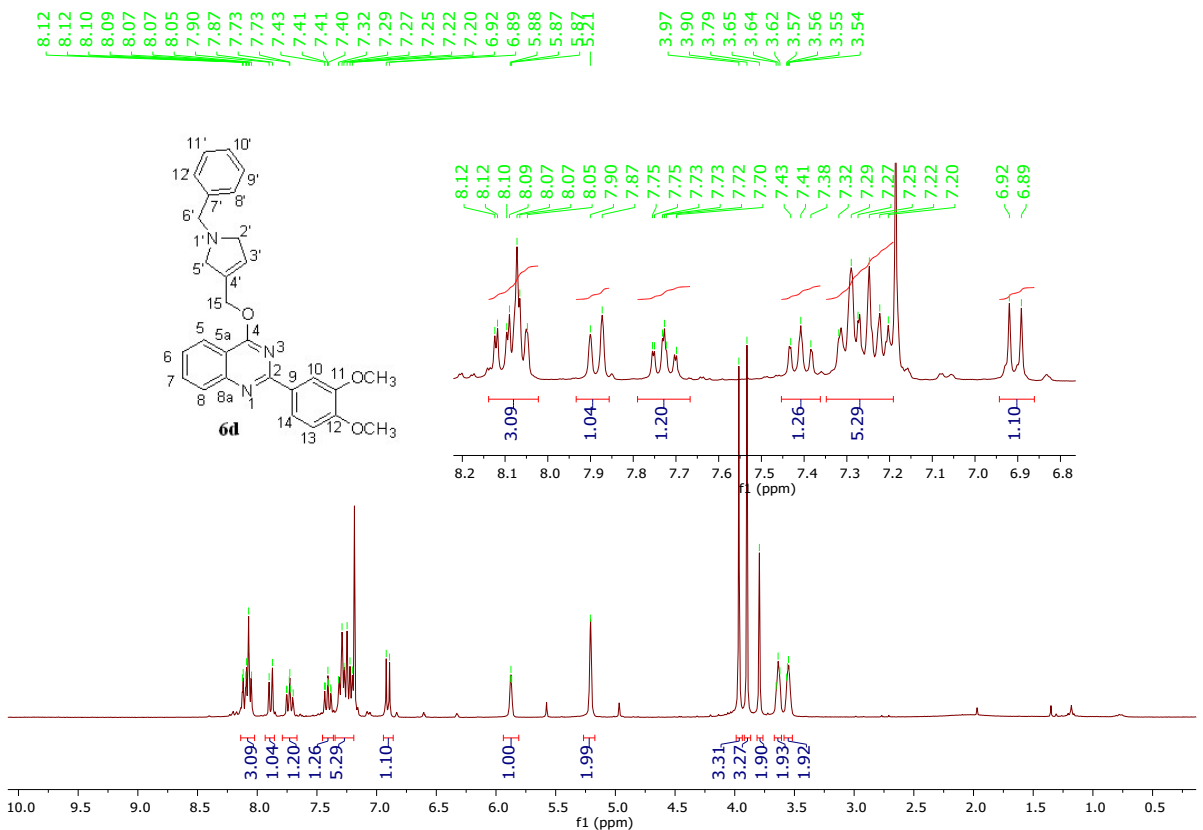

<sup>1</sup>H NMR spectrum of compound 6d

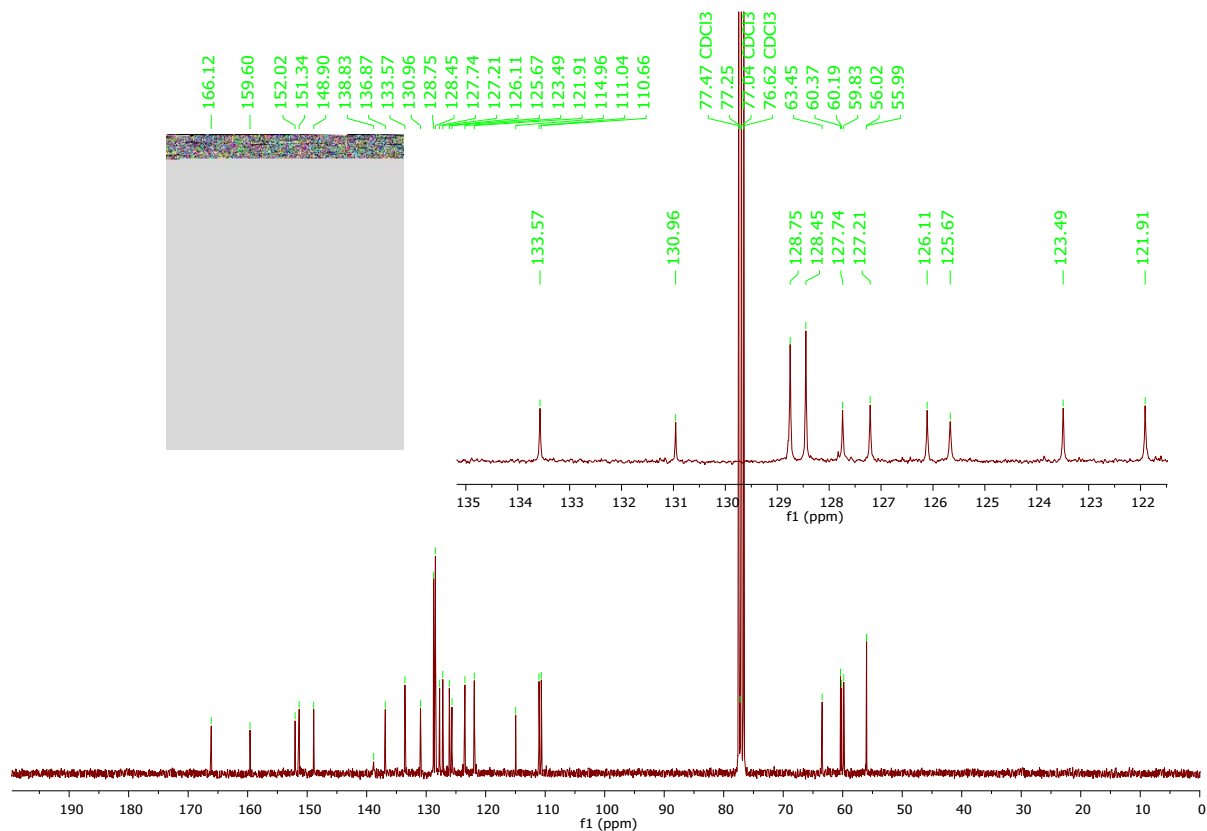

**<sup>13</sup>C NMR spectrum of compound 6d**

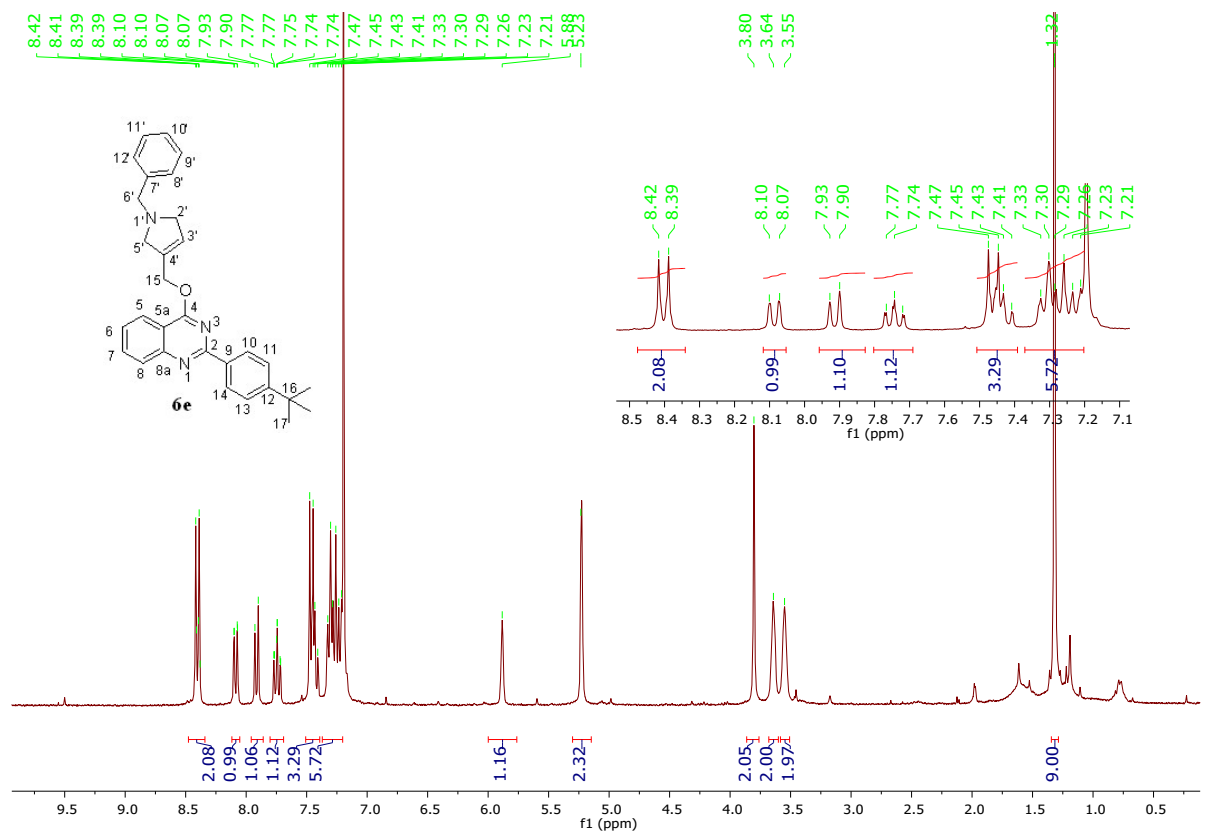

**<sup>1</sup>H NMR spectrum of compound 6e**

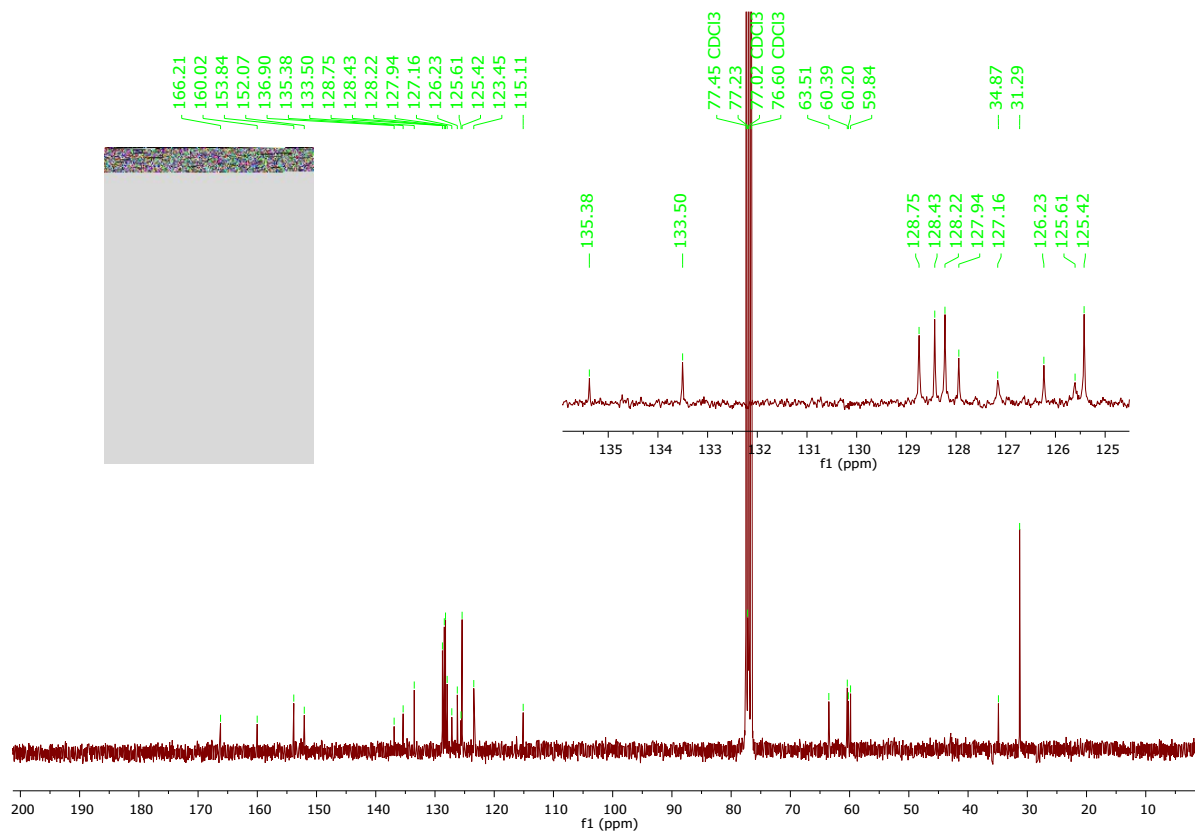

**<sup>13</sup>C NMR spectrum of compound 6e**

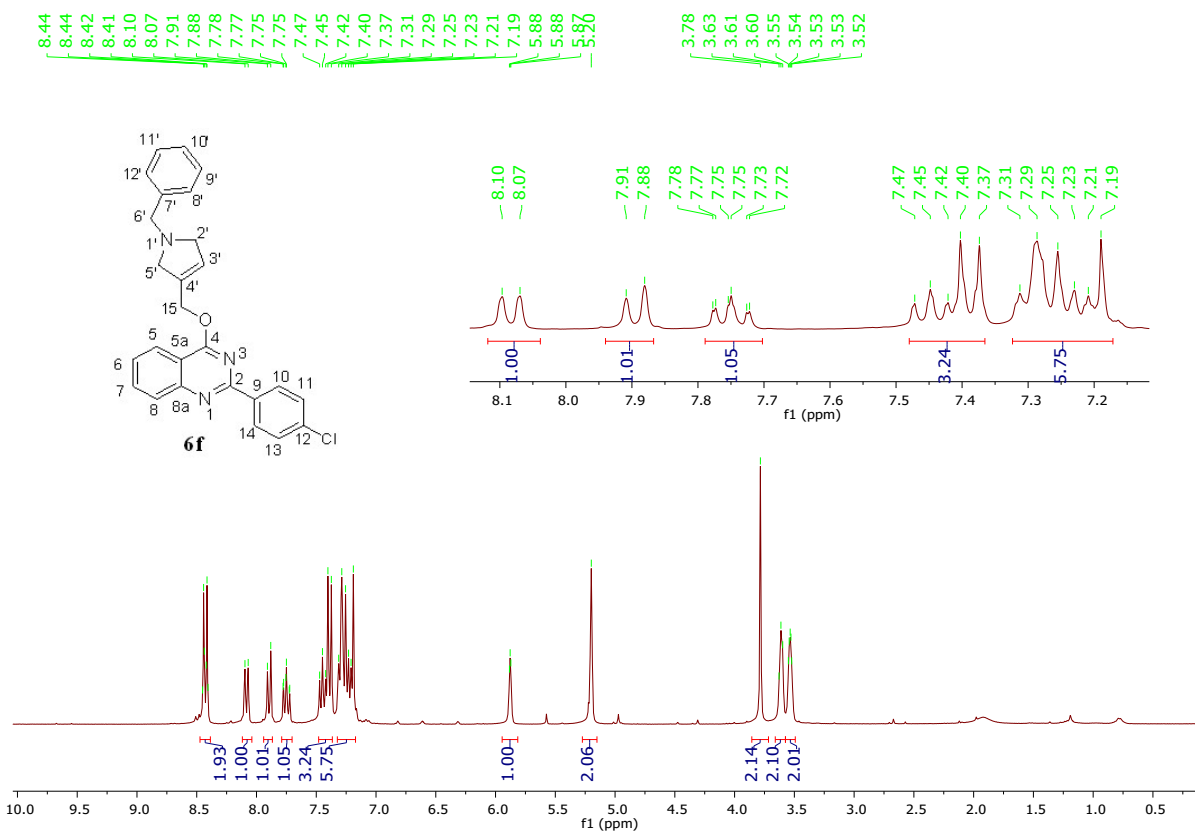

**<sup>1</sup>H NMR spectrum of compound 6f**

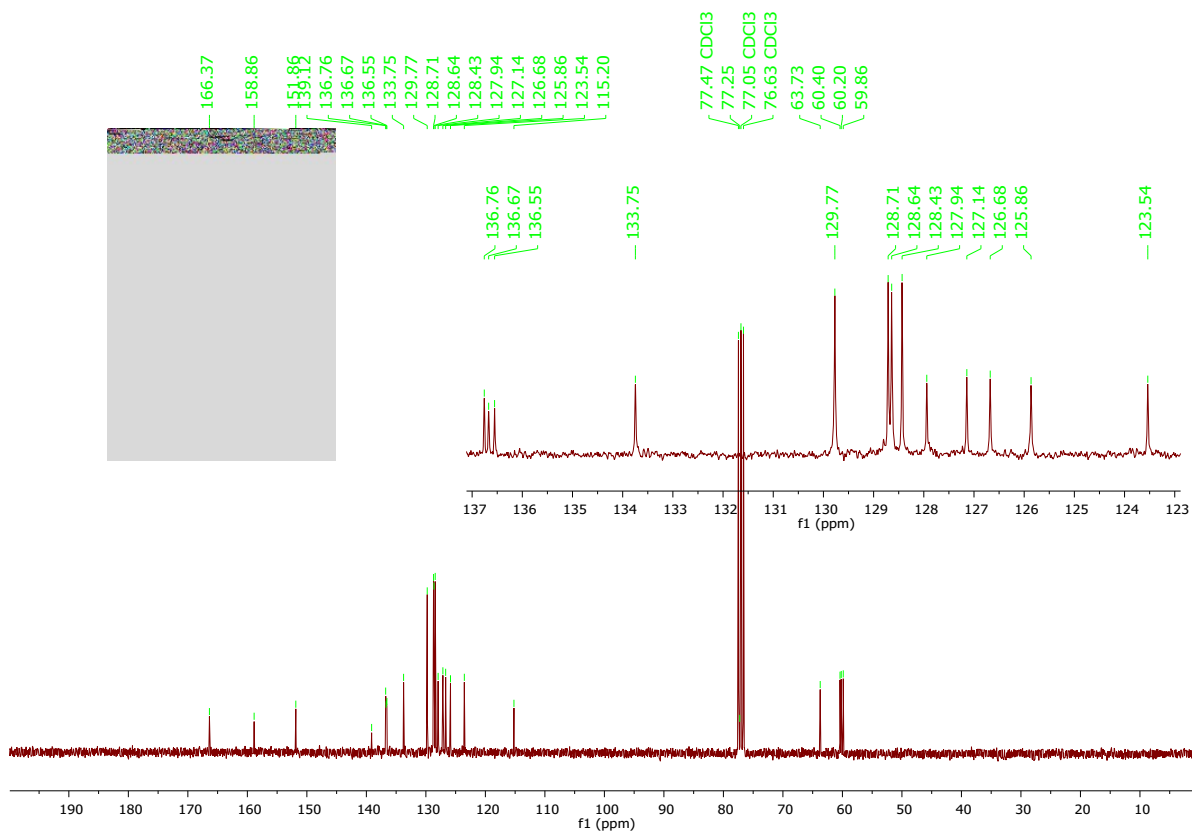

**<sup>13</sup>C NMR spectrum of compound 6f**

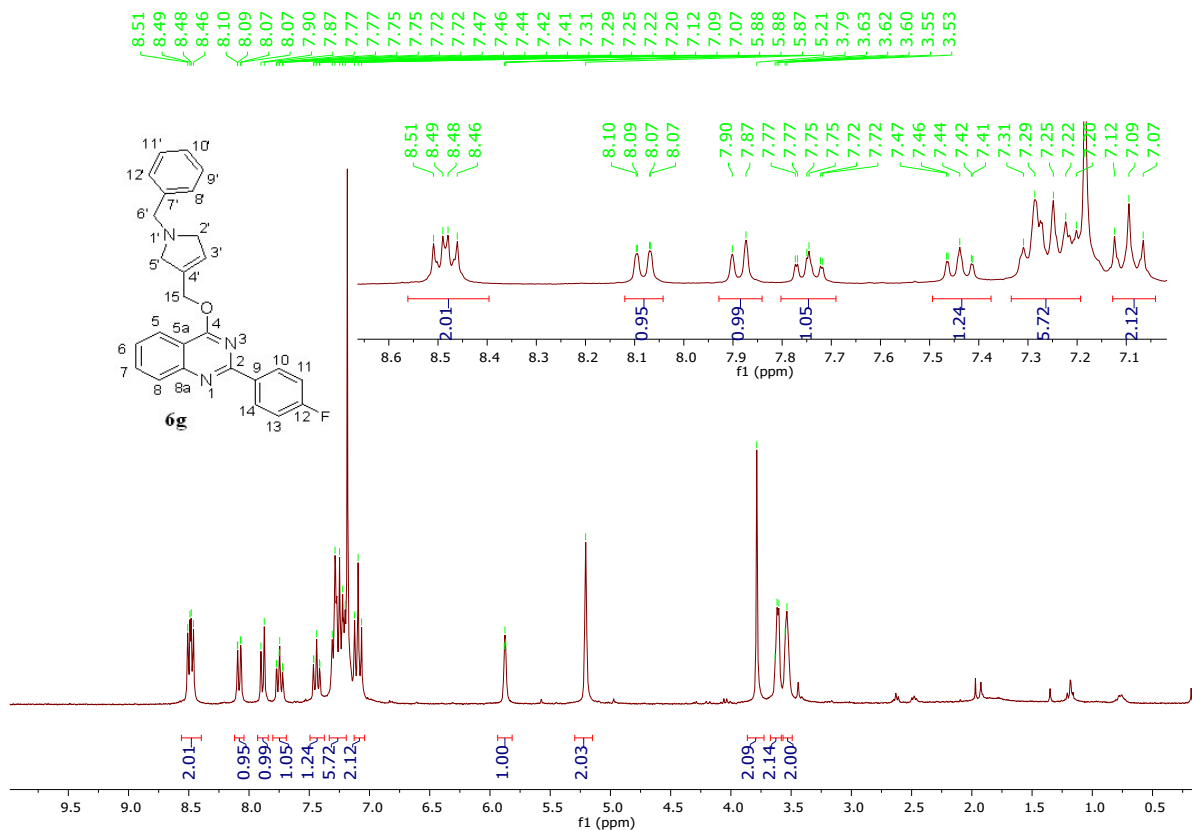

**<sup>1</sup>H NMR spectrum of compound 6g**



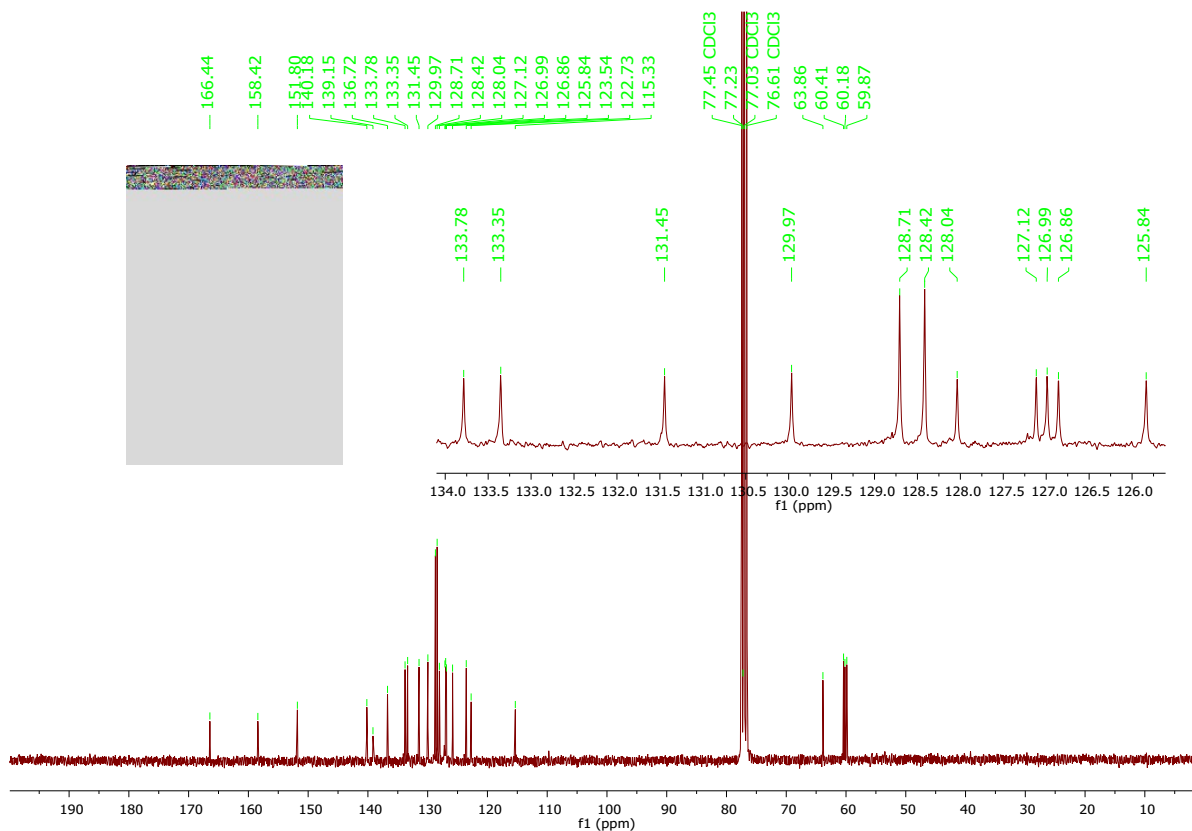

**<sup>13</sup>C NMR spectrum of compound 6h**
